# Supplementary material for: A quinine-squaramide catalyzed enantioselective vinylogous Mannich reaction between benzothiazolimines and γ-butenolides for efficient preparation of chiral N -benzothiazole butyrolactones
Source: Royal Society of Chemistry journal article supplement (doi:10.1039/d4ob01175a), 2024-01-01
Supplement: d4ob01175a1.pdf [file d4ob01175a1.pdf]

# A Quinine-Squaramide Catalyzed Enantioselective Vinylogous Mannich Reaction between Benzothiazolamines and $\gamma$ -Butenolides for Stout Preparation of Chiral N-Benzothiazol Butyrolactones

Jing-Liang Yu<sup>a, b</sup>, Qian-Mao Zhang<sup>a, b</sup>, Guo Cheng<sup>a, b</sup>, Chun-Chun Tang<sup>a, b</sup>, Zhen-Yu Yang<sup>a, b</sup>, Wen-Sheng Li\*<sup>a</sup>, and Li-Xin Wang\*<sup>a</sup>

<sup>a</sup> Key Laboratory of Asymmetric Synthesis and Chirotechnology of Sichuan Province, Chengdu Institute of Organic Chemistry, Chinese Academy of Sciences, Chengdu 610041, China.

E-mail: 792258712@qq.com; wlxioc@cioc.ac.cn.

<sup>b</sup> University of Chinese Academy of Sciences, Beijing 100049, China.

## Table of Contents

|                                                                                           |    |
|-------------------------------------------------------------------------------------------|----|
| 1. General experimental information.....                                                  | 2  |
| 2. General procedure for the syntheses of starting materials.....                         | 3  |
| 3. General procedure for the syntheses of compounds <b>3aa-3qa</b> , <b>3ab-3ai</b> ..... | 3  |
| 4. General procedure for scale-up preparation of <b>3aa</b> .....                         | 3  |
| 5. Characterization data.....                                                             | 4  |
| 6.X-ray diffraction parameters and data for <b>3ac</b> .....                              | 11 |
| 7. HPLC,NMR spectra of products.....                                                      | 13 |

## 1. General experimental information

Chemicals were purchased from commercial suppliers and used without further purification unless otherwise stated. Reactions were monitored by TLC and visualized with ultraviolet light. Flash column chromatography was performed on silica gels (300-400 mesh) eluting with ethyl acetate, dichloromethane and petroleum ether.  $^1\text{H}$  NMR and  $^{13}\text{C}$  NMR spectra were recorded in  $\text{CDCl}_3$  on a Bruker Avance instrument (400 MHz for  $^1\text{H}$  NMR, 101 MHz for  $^{13}\text{C}$  NMR).  $^1\text{H}$  NMR chemical shifts are reported in ppm relative to tetramethylsilane (TMS) with the solvent resonance employed as the internal standard ( $\text{CDCl}_3$  at 7.26 ppm), chemical shift, multiplicity (s = singlet, d = doublet, t = triplet, m = multiplet), coupling constants (Hz) and integration.  $^{13}\text{C}$  NMR chemical shifts are reported in ppm from tetramethylsilane (TMS) with the solvent resonance as the internal standard ( $\text{CDCl}_3$  at 77.1 ppm). High-resolution mass spectra (HRMS) analyses were obtained with the Thermo Scientific LTQ Orbitrap XL mass spectrometer and 1290 Infinity LC/6460 QQQMS. Enantiomeric excess was determined by HPLC analysis on chiralpak AD-H, IC, Optical rotations were measured on a Perkin-Elmer 241 Polarimeter. Melting points were recorded on a Buchi Melting Point B-545.

## 2. General procedure for the syntheses of starting materials.

Benzothiazolimines **1a-q** were prepared according to known procedures <sup>[1]</sup>. Various 3-methyl-5-arylfuran-2(3H)-ones **2a-i** were prepared as reported methods <sup>[2,3]</sup>.

### Reference

- [1]. Q.-J. Ni, X.-X. Song, J.-W. Xiong, G. Raabe, and D. Enders. *Chem. Commun.*, 2015, 51, 1263.  
[2]. S. Žari, M. Kudrjashova, T. Pehk, M. Lopp and T. Kanger, *Org. Lett.*, 2014, 16, 1740.  
[3]. D. J. Jones, and V. C. Gibson, *Heterocycles*, 2006, 68, 1128.

## 3. General procedure for the syntheses of compounds 3aa-3qa, 3ab-3ai.

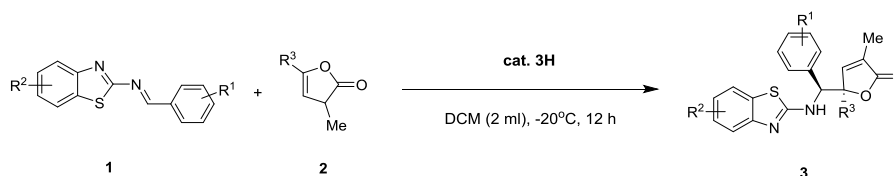

In a vial equipped with a magnetic stirring bar, compound **2** (0.24 mmol, 1.2 equiv), catalyst **3H** (10 mol%) were dissolved in CH<sub>2</sub>Cl<sub>2</sub> (2 mL), and the mixture was stirred at -20 °C for 10 min. Compound **1** (0.20 mmol, 1.0 equiv) was then added to the reaction vial. After completion of the reaction as indicated by TLC (PE/Ea= 3/1), the solvent was evaporated and the crude product was directly purified by flash column chromatography using petroleum ether/ethyl acetate [V (PE/Ea= 10/1 to 3/1)] as eluent.

## 4. General procedure for scale-up preparation of 3aa

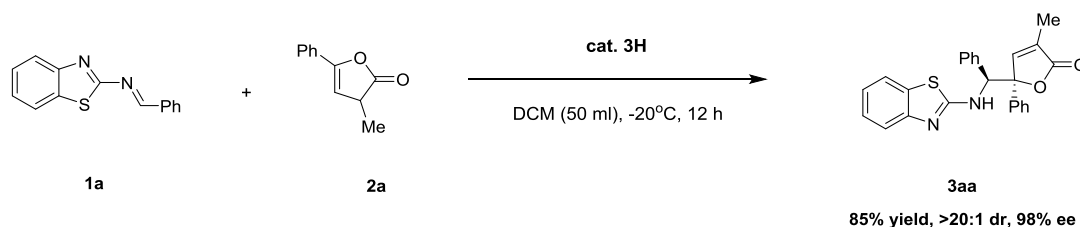

In a vial equipped with a magnetic stirring bar, compound **2a** (1.05g, 6.05 mmol, 1.2 equiv) and catalyst **3H** (10 mol%) were dissolved in CH<sub>2</sub>Cl<sub>2</sub> (50 mL, 0.1 M). The mixture was stirred at -20 °C for 10 min. Compound **1a** (1.20g, 5.04 mmol, 1.0 equiv) was added to the reaction vial. After completion of the reaction as indicated by TLC ((PE/Ea= 3/1), the solvent was evaporated

and the crude product was directly purified by flash column chromatography using petroleum ether/ethyl acetate [ V(PE/EA= 10/1 to 3/1] as eluent. The product **3aa** (1.76 g, 85% yield, >20:1 dr, 98% ee) was obtained as white solid.

## 5. Characterization data

### (S)-5-((S)-(benzo[d]thiazol-2-ylamino)(phenyl)methyl)-3-methyl-5-phenylfuran-2(5H)-one (**3aa**)

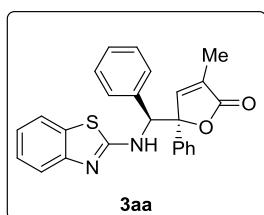

white solid, 71.7 mg, 87% yield; m.p.:150.3-151.1°C, >20:1 dr, 98% ee,  $[\alpha]_D^{20} = +72.7$  (c. 1.00, CHCl<sub>3</sub>); The ee value was determined by HPLC (Chiralpak IC, n-hexane/isopropanol = 85/15, flow rate 1.0 mL/min,  $\lambda = 254$  nm,  $t_{\text{major}} = 6.395$  min,  $t_{\text{minor}} = 5.473$  min); <sup>1</sup>H NMR (400 MHz, CDCl<sub>3</sub>)  $\delta$  7.50 (dd,  $J = 8.0, 3.2$  Hz, 4H), 7.39 (t,  $J = 7.6$  Hz, 2H), 7.37–7.32 (m, 6H), 7.31–7.21 (m, 3H), 7.07 (d,  $J = 7.6$  Hz, 1H), 6.21 (brs, 1H), 5.53 (s, 1H), 1.69 (s, 3H). <sup>13</sup>C NMR (101 MHz, CDCl<sub>3</sub>)  $\delta$  172.5, 165.7, 151.9, 149.6, 136.7, 135.9, 130.8, 129.7, 129.0, 128.7, 128.6, 128.5, 128.1, 125.9, 125.5, 125.1, 121.9, 120.9, 120.7, 119.4, 89.9, 65.3, 10.3. HRMS (ESI) m/z calcd for C<sub>25</sub>H<sub>20</sub>N<sub>2</sub>O<sub>2</sub>SNa<sup>+</sup> [M+Na]<sup>+</sup> 435.1138, found 435.1135.

### (S)-5-((S)-(benzo[d]thiazol-2-ylamino)(4-fluorophenyl)methyl)-3-methyl-5-phenylfuran-2(5H)-one (**3ba**)

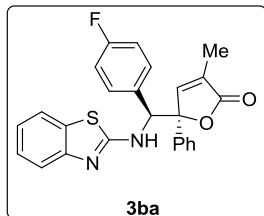

white solid, 76.5 mg, 89% yield; m.p.:122.5-123.0°C, >20:1 dr, 99% ee,  $[\alpha]_D^{20} = +64.5$  (c. 1.00, CHCl<sub>3</sub>); The ee value was determined by HPLC (Chiralpak IC, n-hexane/isopropanol = 85/15, flow rate 1.0 mL/min,  $\lambda = 254$  nm,  $t_{\text{major}} = 6.838$  min,  $t_{\text{minor}} = 5.993$  min); <sup>1</sup>H NMR (400 MHz, CDCl<sub>3</sub>)  $\delta$  7.50–7.43 (m, 4H), 7.37 (t,  $J = 7.2$  Hz, 2H), 7.34–7.26 (m, 3H), 7.24 (t,  $J = 7.2$  Hz, 1H), 7.18 (s, 1H), 7.06–6.98 (m, , 3H), 6.01 (s, 1H), 5.51 (s, 1H), 1.69 (s, 3H). <sup>13</sup>C NMR (101 MHz, CDCl<sub>3</sub>)  $\delta$  172.4, 165.3, 162.7(d,  $J = 249.5$  Hz), 151.9, 149.6, 136.5, 131.9, 130.8, 129.8 (d,  $J = 8.1$  Hz), 129.7, 129.1, 128.8 126.0, 125.4, 122.1, 120.8, 119.5, 115.5(d,  $J = 21.6$  Hz), 89.7, 64.4, 10.4. <sup>19</sup>F NMR (376 MHz, CDCl<sub>3</sub>)  $\delta$  -112.73. HRMS (ESI) m/z calcd for C<sub>25</sub>H<sub>19</sub>FN<sub>2</sub>O<sub>2</sub>SNa<sup>+</sup> [M+Na]<sup>+</sup> 453.1043, found 453.1040.

### (S)-5-((S)-(benzo[d]thiazol-2-ylamino)(4-chlorophenyl)methyl)-3-methyl-5-phenylfuran-2(5H)-one (**3ca**)

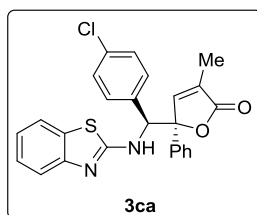

white solid, 77.6 mg, 87% yield; m.p.:132.6-133.4°C, >20:1 dr, 99% ee,  $[\alpha]_D^{20} = +71.2$  (c. 1.00, CHCl<sub>3</sub>); The ee value was determined by HPLC (Chiralpak IC, n-hexane/isopropanol = 85/15, flow rate 1.0 mL/min,  $\lambda = 254$  nm,  $t_{\text{major}} = 5.620$  min,  $t_{\text{minor}} = 5.093$  min); <sup>1</sup>H NMR (400 MHz, CDCl<sub>3</sub>)  $\delta$  7.55–7.49 (m, 2H), 7.46–7.40 (m, 2H), 7.39–7.25 (m, 8H), 7.17 (d,  $J = 1.7$  Hz, 1H), 7.08 (td,  $J = 7.6, 1.2$  Hz, 1H), 6.02 (d,  $J = 8.8$  Hz, 1H), 5.53 (d,  $J = 7.6$  Hz, 1H), 1.69 (d,  $J = 1.5$  Hz, 3H). <sup>13</sup>C NMR (101 MHz, CDCl<sub>3</sub>)  $\delta$  172.2, 165.4, 149.2, 135.7, 135.4, 134.8, 129.9, 129.1, 128.7, 128.6, 127.9, 126.9, 126.0, 122.1, 120.8, 119.5, 89.5, 64.9, 10.3. HRMS (ESI) m/z calcd for C<sub>25</sub>H<sub>19</sub>ClN<sub>2</sub>O<sub>2</sub>SNa<sup>+</sup> [M+Na]<sup>+</sup> 469.0748,

471.0718 , found 469.0744, 471.0710.

**(S)-5-((S)-(benzo[d]thiazol-2-ylamino)(4-bromophenyl)methyl)-3-methyl-5-phenylfuran-2(5H)-one (3da)**

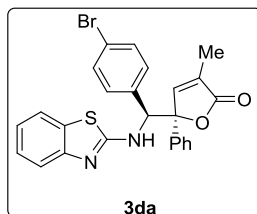

white solid, 81.3 mg, 83% yield; m.p.:123.8-124.6°C, >20:1 dr, 99% ee,  $[\alpha]_D^{20} = +52.2$  (c. 1.00, CHCl<sub>3</sub>); The ee value was determined by HPLC (Chiralpak IC, n-hexane/isopropanol = 95/5, flow rate 1.0 mL/min,  $\lambda = 254$  nm,  $t_{\text{major}} = 8.995$  min,  $t_{\text{minor}} = 7.383$  min); <sup>1</sup>H NMR (400 MHz, CDCl<sub>3</sub>)  $\delta$  7.47 – 7.42 (m, 6H), 7.36 (d,  $J = 7.6$  Hz, 2H), 7.34 – 7.29 (m, 1H), 7.24 (td,  $J = 7.6, 1.2$  Hz, 1H), 7.21 – 7.16 (m, 3H), 7.05 (td,  $J = 7.6, 1.2$  Hz, 1H), 6.03 (s, 1H), 5.51 (s, 1H), 1.71 (d,  $J = 1.6$  Hz, 3H). <sup>13</sup>C NMR (101 MHz, CDCl<sub>3</sub>)  $\delta$  172.3, 165.2, 151.9, 149.5, 136.4, 135.2, 131.6, 130.8, 129.9, 129.7, 129.1, 128.9, 126.0, 125.4, 122.6, 122.1, 120.8, 119.5, 89.5, 64.5, 10.4. HRMS (ESI)  $m/z$  calcd for C<sub>25</sub>H<sub>19</sub>BrN<sub>2</sub>O<sub>2</sub>SNa<sup>+</sup> [M+Na]<sup>+</sup> 513.0243 , 515.0222, found 513.0242, 515.0219

**(S)-5-((S)-(benzo[d]thiazol-2-ylamino)(p-tolyl)methyl)-3-methyl-5-phenylfuran-2(5H)-one (3ea)**

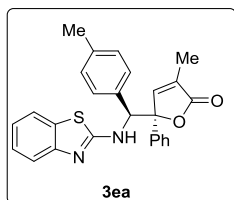

white solid, 74.1 mg, 87% yield; m.p.:151.5-152.2°C, >20:1 dr, 97% ee,  $[\alpha]_D^{20} = +34.6$  (c. 1.00, CHCl<sub>3</sub>); The ee value was determined by HPLC (Chiralpak IC, n-hexane/isopropanol = 85/15, flow rate 1.0 mL/min,  $\lambda = 254$  nm,  $t_{\text{major}} = 5.647$  min,  $t_{\text{minor}} = 4.907$  min); <sup>1</sup>H NMR (400 MHz, CDCl<sub>3</sub>)  $\delta$  7.52 – 7.45 (m, 4H), 7.43 – 7.36 (m, 2H), 7.36 – 7.31 (m, 1H), 7.29 – 7.23 (m, 1H), 7.23 – 7.16 (m, 3H), 7.14-7.12 (m, 2H), 7.10 – 7.01 (m, 1H), 6.12 – 5.96 (m, 1H), 5.45 (d,  $J = 6.8$  Hz, 1H), 2.33 (s, 3H), 1.70 (s, 3H). <sup>13</sup>C NMR (101 MHz, CDCl<sub>3</sub>)  $\delta$  172.6, 165.7, 152.0, 149.7, 138.4, 136.8, 132.8, 130.8, 129.6, 129.2, 128.9, 128.7, 127.9, 125.9, 125.4, 121.9, 120.7, 119.4, 89.9, 65.1, 21.2, 10.4. HRMS (ESI)  $m/z$  calcd for C<sub>26</sub>H<sub>22</sub>N<sub>2</sub>O<sub>2</sub>SNa<sup>+</sup> [M+Na]<sup>+</sup> 449.1294, found 449.1293.

**(S)-5-((S)-(benzo[d]thiazol-2-ylamino)(4-methoxyphenyl)methyl)-3-methyl-5-phenylfuran-2(5H)-one (3fa)**

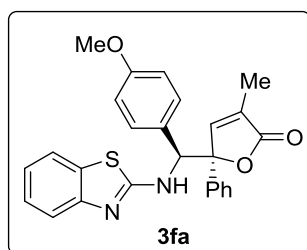

white solid, 70.7 mg, 80% yield; m.p.:173.2-174.5°C, >20:1 dr, 98% ee,  $[\alpha]_D^{20} = +17.5$  (c. 1.00, CHCl<sub>3</sub>); The ee value was determined by HPLC (Chiralpak AD-H, n-hexane/isopropanol = 90/10, flow rate 1.0 mL/min,  $\lambda = 254$  nm,  $t_{\text{major}} = 15.558$  min,  $t_{\text{minor}} = 13.403$  min); <sup>1</sup>H NMR (400 MHz, CDCl<sub>3</sub>)  $\delta$  7.53 – 7.43 (m, 4H), 7.42 – 7.30 (m, 3H), 7.29 – 7.18 (m, 4H), 7.10 – 7.02 (m, 1H), 6.91 – 6.80 (m, 2H), 5.39 (s, 1H), 3.80 (s, 3H), 1.74 (s, 3H). <sup>13</sup>C NMR (101 MHz, CDCl<sub>3</sub>)  $\delta$  172.5, 166.1, 159.7, 151.6, 149.4, 136.8, 130.5, 129.9, 129.3, 128.9, 128.7, 127.7, 125.9, 125.5, 121.9, 120.8, 119.2, 113.8, 90.0, 65.1, 55.3, 10.5. HRMS (ESI)  $m/z$  calcd for C<sub>26</sub>H<sub>22</sub>N<sub>2</sub>O<sub>3</sub>SNa<sup>+</sup> [M+Na]<sup>+</sup> 465.1243, found 465.1242

**(S)-5-((S)-(benzo[d]thiazol-2-ylamino)(4-(trifluoromethyl)phenyl)methyl)-3-methyl-5-phenylfuran-2(5H)-one (3ga)**

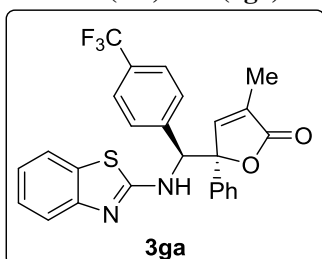

white solid, 78.7 mg, 82% yield; m.p.:140.5-141.3°C, >20:1 dr, 97%

ee,  $[\alpha]_D^{20} = +23.8$  (c. 1.00,  $\text{CHCl}_3$ ); The ee value was determined by HPLC (Chiralpak AD-H, n-hexane/isopropanol = 80/20, flow rate 1.0 mL/min,  $\lambda = 254$  nm,  $t_{\text{major}} = 18.473$  min,  $t_{\text{minor}} = 8.505$  min);  $^1\text{H}$  NMR (400 MHz,  $\text{CDCl}_3$ )  $\delta$  7.58 (d,  $J = 8.0$  Hz, 2H), 7.50 – 7.44 (m, 6H), 7.41 – 7.31 (m, 3H), 7.26 – 7.18 (m, 2H), 7.05 (td,  $J = 7.6, 1.2$  Hz, 1H), 6.09 (brs, 1H), 5.66 (s, 1H), 1.67 (d,  $J = 1.6$  Hz, 3H).  $^{13}\text{C}$  NMR (101 MHz,  $\text{CDCl}_3$ )  $\delta$  172.2, 165.0, 151.8, 149.4, 140.4, 136.3, 130.9, 130.7 (t,  $J = 32.9$  Hz), 130.0, 129.1, 129.0 (t,  $J = 16.6$  Hz), 128.5, 126.0, 125.4 (d,  $J = 7.5$  Hz), 125.3, 122.2, 120.8, 119.5, 89.5, 64.5, 10.4.  $^{19}\text{F}$  NMR (376 MHz,  $\text{CDCl}_3$ )  $\delta$  -61.34. HRMS (ESI)  $m/z$  calcd for  $\text{C}_{26}\text{H}_{19}\text{F}_3\text{N}_2\text{O}_2\text{SNa}^+ [\text{M}+\text{Na}]^+$  503.1012, found 503.1010.

**(S)-5-((S)-(benzo[d]thiazol-2-ylamino)(o-tolyl)methyl)-3-methyl-5-phenylfuran-2(5H)-one (3ha)**

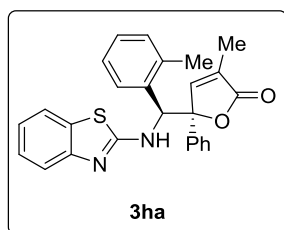

white solid, 65.6 mg, 77% yield; m.p.:155.2-156.4°C, >20:1 dr, 84% ee,  $[\alpha]_D^{20} = -37.4$  (c. 1.00,  $\text{CHCl}_3$ ); The ee value was determined by HPLC (Chiralpak IC, n-hexane/isopropanol = 85/15, flow rate 1.0 mL/min,  $\lambda = 254$  nm,  $t_{\text{major}} = 4.502$  min,  $t_{\text{minor}} = 4.017$  min);  $^1\text{H}$  NMR (400 MHz,  $\text{CDCl}_3$ )  $\delta$  7.50 – 7.40 (m, 4H), 7.39 – 7.30 (m, 3H), 7.25 – 7.20 (m, 3H), 7.18 – 7.15 (m, 3H), 7.06 – 6.98 (m, 1H), 6.04 (brs, 1H), 5.76 (s, 1H), 2.50 (s, 3H), 1.69 (d,  $J = 1.6$  Hz, 3H).  $^{13}\text{C}$  NMR (101 MHz,  $\text{CDCl}_3$ )  $\delta$  172.4, 165.7, 152.1, 148.3, 136.9, 136.3, 134.6, 130.9, 130.6, 130.3, 128.9, 128.7, 128.4, 126.6, 126.5, 125.9, 125.5, 121.9, 120.7, 119.4, 90.1, 60.8, 20.0, 10.4.

. HRMS (ESI)  $m/z$  calcd for  $\text{C}_{26}\text{H}_{22}\text{N}_2\text{O}_2\text{SNa}^+ [\text{M}+\text{Na}]^+$  449.1294, found 449.1293

**(S)-5-((S)-(benzo[d]thiazol-2-ylamino)(m-tolyl)methyl)-3-methyl-5-phenylfuran-2(5H)-one (3ia)**

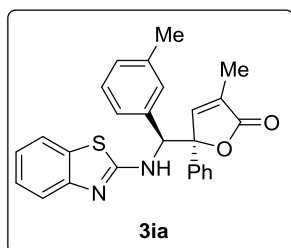

white solid, 74.1 mg, 87% yield; m.p.:170.2-171.8°C, >20:1 dr, 99% ee,  $[\alpha]_D^{20} = +102.2$  (c. 1.00,  $\text{CHCl}_3$ ); The ee value was determined by HPLC (Chiralpak IC, n-hexane/isopropanol = 95/5, flow rate 1.0 mL/min,  $\lambda = 254$  nm,  $t_{\text{major}} = 15.470$  min,  $t_{\text{minor}} = 10.515$  min);  $^1\text{H}$  NMR (400 MHz,  $\text{CDCl}_3$ )  $\delta$  7.53 – 7.45 (m, 4H), 7.41 – 7.33 (m, 2H), 7.31 (d,  $J = 6.8$  Hz, 1H), 7.24 – 7.15 (m, 3H), 7.12 – 6.97 (m, 4H), 6.07 (s, 1H), 5.43 (s, 1H), 2.32 (s, 3H), 1.67 (s, 3H).  $^{13}\text{C}$  NMR (101 MHz,  $\text{CDCl}_3$ )  $\delta$  172.5, 165.8, 152.0, 149.6, 138.2, 136.8, 135.8, 130.8, 129.6, 129.3, 128.9, 128.7, 128.3, 125.9, 125.5, 125.1, 121.9, 120.7, 119.4, 89.9, 65.3, 21.5, 10.4. HRMS (ESI)  $m/z$  calcd for  $\text{C}_{26}\text{H}_{22}\text{N}_2\text{O}_2\text{SNa}^+ [\text{M}+\text{Na}]^+$  449.1294, found 449.1293

**(S)-5-((S)-(benzo[d]thiazol-2-ylamino)(2-chlorophenyl)methyl)-3-methyl-5-phenylfuran-2(5H)-one (3ja)**

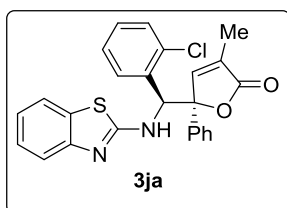

white solid, 73.1 mg, 82% yield; m.p.:141.3-142.4°C, >20:1 dr, 76% ee,  $[\alpha]_D^{20} = +46.4$  (c. 1.00,  $\text{CHCl}_3$ ); The ee value was determined by HPLC (Chiralpak IC, n-hexane/isopropanol = 85/15, flow rate 1.0 mL/min,  $\lambda = 254$  nm,  $t_{\text{major}} = 3.492$  min,  $t_{\text{minor}} = 3.722$  min);  $^1\text{H}$  NMR (400 MHz,  $\text{CDCl}_3$ )  $\delta$  7.81 (dd,  $J = 7.6, 1.6$  Hz, 1H), 7.65 – 7.62 (m, 2H), 7.58 (dd,  $J = 8.0, 1.2$  Hz, 1H), 7.43 – 7.32 (m, 3H), 7.32 – 7.27 (m, 3H), 7.25 – 7.11 (m, 4H), 6.37 (s, 1H), 1.86 (d,  $J = 1.6$  Hz, 3H).  $^{13}\text{C}$  NMR (101 MHz,  $\text{CDCl}_3$ )  $\delta$  173.4, 165.8,

152.0, 150.9, 136.1, 134.4, 134.4, 130.9, 129.8, 129.5, 129.5, 129.2, 128.4, 128.4, 127.1, 126.0, 125.8, 122.1, 120.9, 119.6, 91.1, 59.5, 10.5. HRMS (ESI)  $m/z$  calcd for  $C_{25}H_{19}ClN_2O_2SNa^+$   $[M+Na]^+$  469.0748, 471.0718, found 469.0744, 471.0710

**(S)-5-((S)-(benzo[d]thiazol-2-ylamino)(3-chlorophenyl)methyl)-3-methyl-5-phenylfuran-2(5H)-one (3ka)**

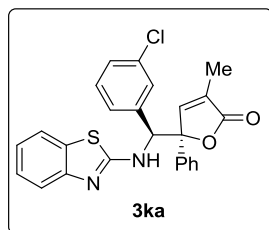

white solid, 77.6 mg, 87% yield; m.p.:135.7-136.5 °C, >20:1 dr, 99% ee,  $[\alpha]_D^{20} = -30.5$  (c. 1.00,  $CHCl_3$ ); The ee value was determined by HPLC (Chiralpak AD-H, n-hexane/isopropanol = 95/5, flow rate 1.0 mL/min,  $\lambda = 254$  nm,  $t_{major} = 23.815$  min,  $t_{minor} = 15.398$  min);  $^1H$  NMR (400 MHz,  $CDCl_3$ )  $\delta$  7.50 (dd,  $J = 13.0, 6.8$  Hz, 4H), 7.41 (t,  $J = 7.6$  Hz, 2H), 7.37 – 7.22 (m, 7H), 7.08 (t,  $J = 7.6$  Hz, 1H), 6.01 (s, 1H), 5.56 (s, 1H), 1.73 (s, 3H).  $^{13}C$  NMR (101 MHz,  $CDCl_3$ )  $\delta$  172.3, 165.1, 151.9, 149.4, 138.3, 136.4, 134.4, 130.8, 129.9, 129.8, 129.1, 128.9, 128.8, 128.4, 126.0, 126.0, 125.4, 122.1, 120.8, 119.5, 89.6, 64.5, 10.4. HRMS (ESI)  $m/z$  calcd for  $C_{25}H_{19}ClN_2O_2SNa^+$   $[M+Na]^+$  469.0748, 471.0718, found 469.0744, 471.0710

**(S)-5-((S)-(benzo[d]thiazol-2-ylamino)(naphthalen-2-yl)methyl)-3-methyl-5-phenylfuran-2(5H)-one (3la)**

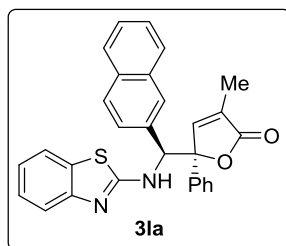

white solid, 81.3 mg, 88% yield; m.p.:183.6-184.5 °C, >20:1 dr, 97% ee,  $[\alpha]_D^{20} = +92.3$  (c. 1.00,  $CHCl_3$ ); The ee value was determined by HPLC (Chiralpak AD-H, n-hexane/isopropanol = 90/10, flow rate 1.0 mL/min,  $\lambda = 254$  nm,  $t_{major} = 28.315$  min,  $t_{minor} = 16.765$  min);  $^1H$  NMR (400 MHz,  $CDCl_3$ )  $\delta$  7.87 – 7.79 (m, 4H), 7.56 – 7.47 (m, 6H), 7.46 – 7.31 (m, 4H), 7.30 (d,  $J = 3.6$  Hz, 1H), 7.25 (t,  $J = 7.6$  Hz, 1H), 7.05 (t,  $J = 7.6$  Hz, 1H), 6.18 (d,  $J = 8.4$  Hz, 1H), 5.68 (d,  $J = 8.0$  Hz, 1H), 1.63 (s, 3H).  $^{13}C$  NMR (101 MHz,  $CDCl_3$ )  $\delta$  172.4, 165.6, 151.9, 149.5, 136.8, 133.4, 133.2, 132.9, 130.8, 129.7, 129.0, 128.8, 128.3, 128.1, 127.7, 127.6, 126.5, 126.5, 125.9, 125.5, 125.3, 121.9, 120.7, 119.4, 90.0, 65.4, 10.4. HRMS (ESI)  $m/z$  calcd for  $C_{29}H_{22}N_2O_2SNa^+$   $[M+Na]^+$  485.1294, found 485.1296.

**(S)-5-((S)-(benzo[d]thiazol-2-ylamino)(furan-2-yl)methyl)-3-methyl-5-phenylfuran-2(5H)-one (3ma)**

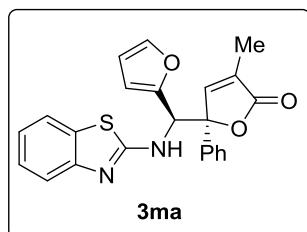

light yellow solid, 68.3 mg, 85% yield; m.p.:122.8-123.9 °C, >20:1 dr, 99% ee,  $[\alpha]_D^{20} = +25.8$  (c. 1.00,  $CHCl_3$ ); The ee value was determined by HPLC (Chiralpak AD-H, n-hexane/isopropanol = 95/5, flow rate 1.0 mL/min,  $\lambda = 254$  nm,  $t_{major} = 20.057$  min,  $t_{minor} = 17.775$  min);  $^1H$  NMR (400 MHz,  $CDCl_3$ )  $\delta$  7.54 (t,  $J = 7.2$  Hz, 2H), 7.47 (d,  $J = 7.6$  Hz, 2H), 7.39 – 7.34 (m, 4H), 7.32 – 7.24 (m, 2H), 7.10 (t,  $J = 7.6$  Hz, 1H), 6.32 (s, 2H), 5.77 (s, 2H), 1.85 (s, 3H).  $^{13}C$  NMR (101 MHz,  $CDCl_3$ )  $\delta$  172.5, 165.4, 151.9, 149.5, 148.5, 142.5, 136.4, 130.8, 130.0, 128.8, 128.7, 125.9, 125.5, 122.2, 120.8, 119.5, 110.7, 109.5, 89.7, 59.3, 10.5. HRMS (ESI)  $m/z$  calcd for  $C_{23}H_{18}N_2O_3SNa^+$   $[M+Na]^+$  425.0930, found 425.0931.

**(S)-5-((R)-(benzo[d]thiazol-2-ylamino)(thiophen-2-yl)methyl)-3-methyl-5-phenylfuran-2(5H)-one (3mb)**

**-one (3na)**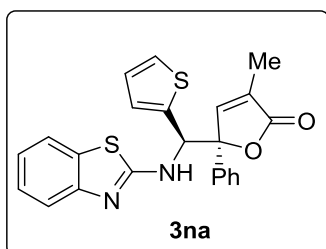

light yellow solid, 72.7 mg, 87% yield; m.p.:128.5-130.1°C, >20:1 dr,  $[\alpha]_D^{20} = +31.9$  (c. 1.00, CHCl<sub>3</sub>); 99% ee, The ee value was determined by HPLC (Chiralpak AD-H, n-hexane/isopropanol = 90/10, flow rate 1.0 mL/min,  $\lambda = 254$  nm,  $t_{\text{major}} = 26.125$  min,  $t_{\text{minor}} = 17.907$  min); <sup>1</sup>H NMR (400 MHz, CDCl<sub>3</sub>)  $\delta$  7.52 (t,  $J = 7.2$  Hz, 4H), 7.38 (t,  $J = 7.6$  Hz, 2H), 7.34 – 7.20 (m, 4H), 7.09 (d,  $J = 6.0$  Hz, 2H), 7.01 – 6.85 (m, 1H), 6.03 (brs, 1H), 5.79 (s, 1H), 1.79 (s, 3H). <sup>13</sup>C NMR (101 MHz, CDCl<sub>3</sub>)  $\delta$  172.7, 165.3, 151.9, 149.3, 139.1, 136.6, 130.9, 130.0, 128.9, 128.8, 127.3, 126.8, 125.9, 125.8, 125.5, 122.1, 120.8, 119.5, 89.9, 60.7, 10.5. HRMS (ESI) m/z calcd for C<sub>23</sub>H<sub>18</sub>N<sub>2</sub>O<sub>2</sub>S<sub>2</sub>Na<sup>+</sup> [M+Na]<sup>+</sup> 441.0702, found 441.0702.

**(S)-5-((S)-((6-chlorobenzo[d]thiazol-2-yl)amino)(phenyl)methyl)-3-methyl-5-phenylfuran-2(5H)-one (3oa)**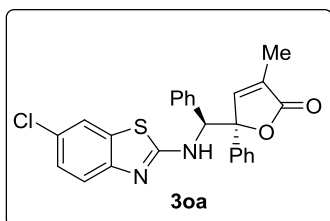

white solid, 76.7 mg, 86% yield; m.p.:175.4-176.8 °C, 7:1 dr, 99% ee,  $[\alpha]_D^{20} = +37.4$  (c. 1.00, CHCl<sub>3</sub>); The ee value was determined by HPLC (Chiralpak AD-H, n-hexane/isopropanol = 95/5, flow rate 1.0 mL/min,  $\lambda = 254$  nm,  $t_{\text{major}} = 23.312$  min,  $t_{\text{minor}} = 12.643$  min); <sup>1</sup>H NMR (400 MHz, CDCl<sub>3</sub>)  $\delta$  7.52 – 7.38 (m, 4H), 7.37 – 7.25 (m, 8H), 7.22 – 7.12 (d,  $J = 7.3$  Hz, 2H), 6.20 (brs, 1H), 5.52 (s, 1H), 1.65 (s, 3H). <sup>13</sup>C NMR (101 MHz, CDCl<sub>3</sub>)  $\delta$  172.5, 165.8, 150.6, 149.5, 136.7, 135.8, 132.0, 129.7, 129.0, 128.8, 128.7, 128.5, 128.0, 127.0, 126.3, 125.4, 120.4, 120.0, 89.9, 65.2, 10.3. HRMS (ESI) m/z calcd for C<sub>25</sub>H<sub>19</sub>ClN<sub>2</sub>O<sub>2</sub>SNa<sup>+</sup> [M+Na]<sup>+</sup> 469.0748, 471.0718, found 469.0744, 471.0710

**(S)-5-((S)-((6-methoxybenzo[d]thiazol-2-yl)amino)(phenyl)methyl)-3-methyl-5-phenylfuran-2(5H)-one (3pa)**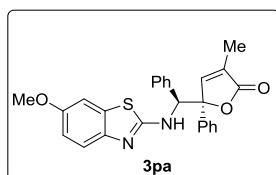

white solid, 70.7 mg, 80% yield; m.p.:168.8-170.1°C, >20:1 dr, 98% ee,  $[\alpha]_D^{20} = +61.3$  (c. 1.00, CHCl<sub>3</sub>); The ee value was determined by HPLC (Chiralpak IC, n-hexane/isopropanol = 85/15, flow rate 1.0 mL/min,  $\lambda = 254$  nm,  $t_{\text{major}} = 5.715$  min,  $t_{\text{minor}} = 5.982$  min); <sup>1</sup>H NMR (400 MHz, CDCl<sub>3</sub>)  $\delta$  7.46 (dd,  $J = 7.6, 1.6$  Hz, 2H), 7.35 (q,  $J = 8.8, 7.6$  Hz, 4H), 7.31 – 7.28 (m, 4H), 7.19 (d,  $J = 1.6$  Hz, 1H), 7.01 (d,  $J = 2.4$  Hz, 1H), 6.83 (dd,  $J = 8.8, 2.4$  Hz, 1H), 5.89 (s, 1H), 5.45 (d,  $J = 3.6$  Hz, 1H), 3.76 (s, 3H), 1.66 (d,  $J = 1.6$  Hz, 3H). <sup>13</sup>C NMR (101 MHz, CDCl<sub>3</sub>)  $\delta$  172.5, 163.9, 155.4, 149.7, 146.2, 136.8, 136.1, 131.8, 129.6, 128.9, 128.7, 128.5, 128.4, 128.0, 125.5, 119.7, 113.6, 105.2, 89.9, 65.2, 55.9, 10.3. HRMS (ESI) m/z calcd for C<sub>26</sub>H<sub>22</sub>N<sub>2</sub>O<sub>3</sub>SNa<sup>+</sup> [M+Na]<sup>+</sup> 465.1243, found 465.1242.

**(S)-3-methyl-5-((S)-((4-methylbenzo[d]thiazol-2-yl)amino)(phenyl)methyl)-5-phenylfuran-2(5H)-one (3qa)**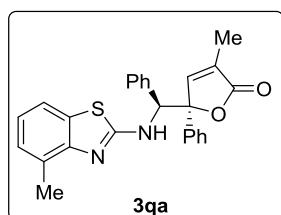

white solid, 68.2 mg, 80% yield; m.p.:164.7-165.4°C, >20:1 dr, 14% ee,  $[\alpha]_D^{20} = -24.8$  (c. 1.00, CHCl<sub>3</sub>); The ee value was determined by HPLC (Chiralpak IC, n-hexane/isopropanol = 85/15, flow rate 1.0 mL/min,  $\lambda = 254$  nm,  $t_{\text{major}} = 3.657$  min,  $t_{\text{minor}} = 3.982$  min); <sup>1</sup>H NMR (400 MHz, CDCl<sub>3</sub>)  $\delta$  7.58 (d,  $J = 1.6$  Hz, 1H), 7.43 (d,  $J = 7.6$  Hz, 1H), 7.32 –



7.30 (m, 4H), 7.29 – 7.19 (m, 6H), 7.17 (d,  $J = 7.6$  Hz, 1H), 7.06 (d,  $J = 7.6$  Hz, 1H), 5.80 (dd,  $J = 12.0, 8.4$  Hz, 1H), 5.68 (dd,  $J = 8.4, 2.8$  Hz, 1H), 2.69 (s, 3H), 1.85 (d,  $J = 1.6$  Hz, 3H).  $^{13}\text{C}$  NMR (101 MHz,  $\text{CDCl}_3$ )  $\delta$  173.5, 164.9, 150.9, 137.1, 136.0, 130.6, 129.2, 128.8, 128.7, 128.6, 128.2, 128.2, 126.7, 125.4, 122.0, 118.4, 91.3, 64.9, 18.5, 10.6. HRMS (ESI)  $m/z$  calcd for  $\text{C}_{26}\text{H}_{22}\text{N}_2\text{O}_2\text{SNa}^+ [\text{M}+\text{Na}]^+$  449.1294, found 449.1293.

**(S)-5-((S)-(benzo[d]thiazol-2-ylamino)(phenyl)methyl)-3-methyl-5-(p-tolyl)furan-2(5H)-one (3ab)**

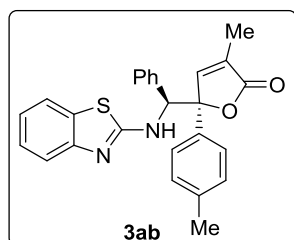

white solid, 77.5 mg, 91% yield; m.p.:158.3-159.2°C, >20:1 dr, 99% ee,  $[\alpha]_{\text{D}}^{20} = +72.6$  (c. 1.00,  $\text{CHCl}_3$ ); The ee value was determined by HPLC (Chiralpak IC, n-hexane/isopropanol = 85/15, flow rate 1.0 mL/min,  $\lambda = 254$  nm,  $t_{\text{major}} = 4.290$  min,  $t_{\text{minor}} = 3.882$  min);  $^1\text{H}$  NMR (400 MHz,  $\text{CDCl}_3$ )  $\delta$  7.50 (dd,  $J = 8.0, 2.0$  Hz, 2H), 7.38 (d,  $J = 8.0$  Hz, 2H), 7.34–7.30 (m, 5H), 7.29 – 7.23 (m, 1H), 7.24 – 7.17 (m, 3H), 7.09 – 7.03 (m, 1H), 5.48 (s, 1H), 2.34 (s, 3H), 1.68 (d,  $J = 1.6$  Hz, 3H).  $^{13}\text{C}$  NMR (101 MHz,  $\text{CDCl}_3$ )  $\delta$  172.6, 165.8, 151.9, 149.8, 138.7, 136.0, 133.7, 130.8, 129.7, 129.4, 128.5, 128.4, 128.1, 125.9, 125.4, 121.9, 120.7, 119.3, 89.8, 65.3, 21.1, 10.3. HRMS (ESI)  $m/z$  calcd for  $\text{C}_{26}\text{H}_{22}\text{N}_2\text{O}_2\text{SNa}^+ [\text{M}+\text{Na}]^+$  449.1294, found 449.1293

**(S)-5-((S)-(benzo[d]thiazol-2-ylamino)(phenyl)methyl)-5-(4-chlorophenyl)-3-methylfuran-2(5H)-one (3ac)**

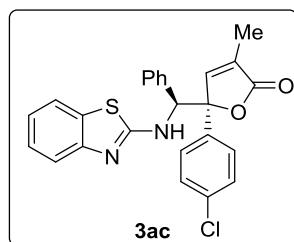

white solid, 76.7.3 mg, 90% yield; m.p.:152.6-153.9 °C, >20:1 dr, 99% ee,  $[\alpha]_{\text{D}}^{20} = +57.3$  (c. 1.00,  $\text{CHCl}_3$ ); The ee value was determined by HPLC (Chiralpak IC, n-hexane/isopropanol = 85/15, flow rate 1.0 mL/min,  $\lambda = 254$  nm,  $t_{\text{major}} = 4.300$  min,  $t_{\text{minor}} = 3.902$  min);  $^1\text{H}$  NMR (400 MHz,  $\text{CDCl}_3$ )  $\delta$  7.52 – 7.48 (m, 4H), 7.37 (d,  $J = 8.0$  Hz, 2H), 7.34 – 7.25 (m, 6H), 7.17 (d,  $J = 2.0$  Hz, 1H), 7.07 (t,  $J = 7.6$  Hz, 1H), 6.19 (d,  $J = 8.0$  Hz, 1H), 5.53 (d,  $J = 5.2$  Hz, 1H), 1.69 (d,  $J = 1.6$  Hz, 3H).  $^{13}\text{C}$  NMR (101 MHz,  $\text{CDCl}_3$ )  $\delta$  172.3, 165.5, 151.9, 149.2, 136.0, 135.8, 132.0, 130.8, 129.9, 128.7, 128.5, 128.0, 127.2, 125.9, 122.9, 122.0, 120.8, 119.5, 89.6, 64.8, 10.3. HRMS (ESI)  $m/z$  calcd for  $\text{C}_{25}\text{H}_{19}\text{ClN}_2\text{O}_2\text{SNa}^+ [\text{M}+\text{Na}]^+$  469.0748, 471.0718, found 469.0744, 471.0710

**(S)-5-((S)-(benzo[d]thiazol-2-ylamino)(phenyl)methyl)-5-(4-bromophenyl)-3-methylfuran-2(5H)-one (3ad)**

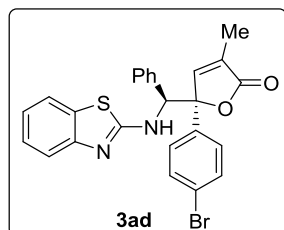

white solid, 85.3 mg, 87% yield; m.p.:142.6-143.3°C, >20:1 dr, 99% ee,  $[\alpha]_{\text{D}}^{20} = +40.5$  (c. 1.00,  $\text{CHCl}_3$ ); The ee value was determined by HPLC (Chiralpak IC, n-hexane/isopropanol = 85/15, flow rate 1.0 mL/min,  $\lambda = 254$  nm,  $t_{\text{major}} = 8.798$  min,  $t_{\text{minor}} = 7.190$  min);  $^1\text{H}$  NMR (400 MHz,  $\text{CDCl}_3$ )  $\delta$  7.55 (d,  $J = 2.0$  Hz, 1H), 7.46 (dd,  $J = 7.2, 2.0$  Hz, 2H), 7.37 (d,  $J = 2.8$  Hz, 1H), 7.36 (d,  $J = 2.8$  Hz, 1H), 7.32 – 7.27 (m, 8H), 7.17 (d,  $J = 1.6$  Hz, 1H), 6.21 (brs, 1H), 5.49 (s, 1H), 1.64 (s, 3H).  $^{13}\text{C}$  NMR (101 MHz,  $\text{CDCl}_3$ )  $\delta$  172.5, 165.9, 150.9, 149.4, 136.7, 135.7, 132.4, 130.1, 129.7, 129.1, 129.0, 128.8, 128.7, 128.5, 128.1, 128.0, 125.4, 125.1, 123.2, 120.4, 114.3, 104.1, 89.8, 65.3, 10.3. HRMS (ESI)  $m/z$  calcd for  $\text{C}_{25}\text{H}_{19}\text{BrN}_2\text{O}_2\text{SNa}^+ [\text{M}+\text{Na}]^+$  513.0243, 515.0222, found 513.0242, 515.0219

**(S)-5-((S)-(benzo[d]thiazol-2-ylamino)(phenyl)methyl)-5-(4-fluorophenyl)-3-methylfuran-2(5H)-one (3ae)**

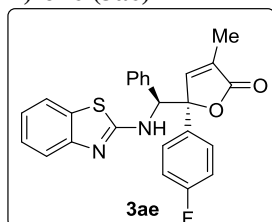

white solid, 73.9 mg, 86% yield; m.p.:135.3-136.7°C, >20:1 dr, 96% ee,  $[\alpha]_D^{20} = +50.3$  (c. 1.00, CHCl<sub>3</sub>); The ee value was determined by HPLC (Chiralpak IC, n-hexane/isopropanol = 95/5, flow rate 1.0 mL/min,  $\lambda = 254$  nm,  $t_{\text{major}} = 11.520$  min,  $t_{\text{minor}} = 9.752$  min); <sup>1</sup>H NMR (400 MHz, CDCl<sub>3</sub>)  $\delta$  7.52 – 7.41 (m, 4H), 7.32 – 7.26 (m, 5H), 7.24– 7.22 (m, 1H), 7.19 (s, 1H), 7.07 –7.01 (m, 3H), 6.19 (brs, 1H), 5.53 (d,  $J = 5.2$  Hz, 1H), 1.68 (s, 3H). <sup>13</sup>C NMR (101 MHz, CDCl<sub>3</sub>)  $\delta$  172.4, 165.6, 162.7(d,  $J = 249.7$  Hz), 151.9, 149.4, 135.9, 132.7, 132.6, 130.8, 129.9, 128.6, 128.5, 128.0, 127.5(d,  $J = 8.3$  Hz), 125.9, 122.0, 120.8, 119.4, 115.9(d,  $J = 20.7$  Hz), 89.6, 65.1, 10.4. <sup>19</sup>F NMR (376 MHz, CDCl<sub>3</sub>)  $\delta$  -112.70. HRMS (ESI) m/z calcd for C<sub>25</sub>H<sub>19</sub>FN<sub>2</sub>O<sub>2</sub>SNa<sup>+</sup> [M+Na]<sup>+</sup> 453.1043, found 453.1040.

**(S)-5-((S)-(benzo[d]thiazol-2-ylamino)(phenyl)methyl)-5-(4-methoxyphenyl)-3-methylfuran-2(5H)-one (3af)**

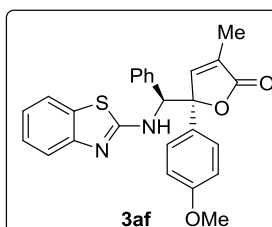

white solid, 77.8 mg, 88% yield; m.p.:157.1-158.4°C, >20:1 dr, 99% ee,  $[\alpha]_D^{20} = +26.3$  (c. 1.00, CHCl<sub>3</sub>); The ee value was determined by HPLC (Chiralpak IC, n-hexane/isopropanol = 85/15, flow rate 1.0 mL/min,  $\lambda = 254$  nm,  $t_{\text{major}} = 6.527$  min,  $t_{\text{minor}} = 6.072$  min); <sup>1</sup>H NMR (400 MHz, CDCl<sub>3</sub>)  $\delta$  7.52 – 7.46 (m, 2H), 7.36 (d,  $J = 8.8$  Hz, 2H), 7.32 – 7.27 (m, 5H), 7.24 (s, 1H), 7.19 (d,  $J = 1.7$  Hz, 1H), 7.04 (td,  $J = 7.6, 1.2$  Hz, 1H), 6.88 (d,  $J = 8.8$  Hz, 2H), 6.11 (d,  $J = 8.4$  Hz, 1H), 5.44 (d,  $J = 6.4$  Hz, 1H), 3.77 (s, 3H), 1.67 (d,  $J = 1.6$  Hz, 3H). <sup>13</sup>C NMR (101 MHz, CDCl<sub>3</sub>)  $\delta$  172.6, 165.7, 159.8, 152.0, 149.8, 136.0, 130.8, 129.4, 128.5, 128.4, 128.1, 126.9, 125.9, 121.9, 120.7, 119.4, 114.3, 89.7, 65.2, 55.3, 10.3. HRMS (ESI) m/z calcd for C<sub>26</sub>H<sub>22</sub>N<sub>2</sub>O<sub>3</sub>SNa<sup>+</sup> [M+Na]<sup>+</sup> 465.1243, found 465.1242.

**(S)-5-((S)-(benzo[d]thiazol-2-ylamino)(phenyl)methyl)-5-(3,4-dimethylphenyl)-3-methylfuran-2(5H)-one (3ag)**

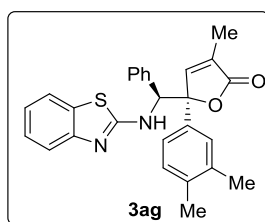

white solid, 72.2 mg, 82% yield; m.p.:163.5-164.8°C, >20:1 dr, 99% ee,  $[\alpha]_D^{20} = +80.2$  (c. 1.00, CHCl<sub>3</sub>); The ee value was determined by HPLC (Chiralpak IC, n-hexane/isopropanol = 85/15, flow rate 1.0 mL/min,  $\lambda = 254$  nm,  $t_{\text{major}} = 5.873$  min,  $t_{\text{minor}} = 4.990$  min); <sup>1</sup>H NMR (400 MHz, CDCl<sub>3</sub>)  $\delta$  7.50 (dd,  $J = 8.0, 1.2$  Hz, 2H), 7.39 –7.35(m, 4H), 7.33 –7.28 (m, 2H) 7.19 –7.14 (m, 2H), 7.07 (d,  $J = 7.2$  Hz, 1H), 6.09 (d,  $J = 8.0$  Hz, 1H), 5.45 (d,  $J = 6.4$  Hz, 1H), 2.27 (s, 3H) 2.24 (s, 3H), 1.66 (d,  $J = 1.6$  Hz, 3H). <sup>13</sup>C NMR (101 MHz, CDCl<sub>3</sub>)  $\delta$  172.7, 165.8, 152.0, 150.0, 137.4, 137.3, 136.0, 134.0, 130.8, 130.2, 129.2, 128.5, 128.4, 128.1, 126.5, 125.9, 122.7, 121.8, 120.7, 119.3, 89.7, 65.3, 20.0, 19.4, 10.3. HRMS (ESI) m/z calcd for C<sub>27</sub>H<sub>24</sub>N<sub>2</sub>O<sub>2</sub>SNa<sup>+</sup> [M+Na]<sup>+</sup> 463.1451, found 463.1450.

**(S)-5-((S)-(benzo[d]thiazol-2-ylamino)(phenyl)methyl)-5-(2,4-dimethylphenyl)-3-methylfuran-2(5H)-one (3ah)**

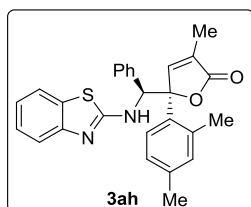

white solid, 70.4 mg, 80% yield m.p.:172.3-174.1°C, >20:1 dr, 94% ee,  $[\alpha]_D^{20} = -52.7$  (c. 1.00, CHCl<sub>3</sub>); The ee value was determined by

HPLC (Chiralpak IC, n-hexane/isopropanol = 85/15, flow rate 1.0 mL/min,  $\lambda = 254$  nm,  $t_{\text{major}} = 5.073$  min,  $t_{\text{minor}} = 4.573$  min);  $^1\text{H}$  NMR (400 MHz,  $\text{CDCl}_3$ )  $\delta$  7.57 – 7.53 (m, 2H), 7.44 – 7.39 (m, 2H), 7.31 – 7.27 (m, 5H), 7.22 (d,  $J = 8.0$  Hz, 1H), 7.09 (s, 1H), 7.00 (s, 2H), 5.61 (s, 1H), 5.08 (s, 1H), 2.33 (s, 3H), 2.17 (s, 3H), 1.67 (s, 3H).  $^{13}\text{C}$  NMR (101 MHz,  $\text{CDCl}_3$ )  $\delta$  178.0, 166.5, 152.4, 150.7, 139.0, 135.6, 135.4, 130.9, 129.8, 129.3, 128.1, 127.6, 127.4, 127.1, 127.1, 125.7, 125.1, 123.7, 121.0, 119.9, 118.3, 106.7, 63.8, 53.9, 20.2, 20.1. HRMS (ESI)  $m/z$  calcd for  $\text{C}_{27}\text{H}_{24}\text{N}_2\text{O}_2\text{SNa}^+ [\text{M}+\text{Na}]^+$  463.1451, found 463.1450.

**(S)-5-((S)-(benzo[d]thiazol-2-ylamino)(phenyl)methyl)-3-methyl-5-(naphthalen-2-yl)furan-2(5H)-one (3ai)**

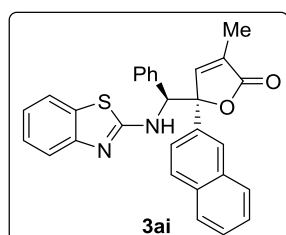

white solid, 81.3 mg, 88% yield; m.p.: 192.4–193.5°C, >20:1 dr, 99% ee,  $[\alpha]_{\text{D}}^{20} = +51.3$  (c. 1.00,  $\text{CHCl}_3$ ); The ee value was determined by HPLC (Chiralpak IC, n-hexane/isopropanol = 95/5, flow rate 1.0 mL/min,  $\lambda = 254$  nm,  $t_{\text{major}} = 13.865$  min,  $t_{\text{minor}} = 11.890$  min);  $^1\text{H}$  NMR (400 MHz,  $\text{CDCl}_3$ )  $\delta$  8.01 (s, 1H), 7.90 – 7.81 (m, 3H), 7.59 – 7.50 (m, 3H), 7.47 (d,  $J = 8.0$  Hz, 2H), 7.39 – 7.31 (m, 6H), 7.26 (s, 1H), 7.04 (t,  $J = 7.6$  Hz, 1H), 6.23 (s, 1H), 5.64 (s, 1H), 1.71 (s, 3H).  $^{13}\text{C}$  NMR (101 MHz,  $\text{CDCl}_3$ )  $\delta$  172.5, 165.7, 149.6, 135.9, 134.0, 133.1, 130.6, 129.8, 128.9, 128.6, 128.5, 128.3, 128.1, 127.7, 126.9, 126.8, 125.9, 124.9, 122.7, 122.0, 120.7, 119.3, 90.0, 65.2, 10.4. HRMS (ESI)  $m/z$  calcd for  $\text{C}_{29}\text{H}_{22}\text{N}_2\text{O}_2\text{SNa}^+ [\text{M}+\text{Na}]^+$  485.1294, found 485.1296.

**6.X-ray diffraction parameters and data for 3ac**

**Table S1:** Important crystal data of compound **3ac**

|                                                |                                                                                              |                         |
|------------------------------------------------|----------------------------------------------------------------------------------------------|-------------------------|
| Empirical formula                              | C <sub>51</sub> H <sub>40</sub> Cl <sub>4</sub> N <sub>4</sub> O <sub>4</sub> S <sub>2</sub> |                         |
| Formula weight                                 | 978.79                                                                                       |                         |
| Temperature/K                                  | 293(2)                                                                                       |                         |
| Crystal system                                 | monoclinic                                                                                   |                         |
| Space group                                    | P21                                                                                          |                         |
| a/Å                                            | 15.8968(6)                                                                                   |                         |
| b/Å                                            | 11.2913(4)                                                                                   |                         |
| c/Å                                            | 16.5092(6)                                                                                   |                         |
| $\alpha / ^\circ$                              | 90                                                                                           |                         |
| $\beta / ^\circ$                               | 109.741(4)                                                                                   |                         |
| $\gamma / ^\circ$                              | 90                                                                                           |                         |
| Volume/ Å <sup>3</sup>                         | 2789.17(19)                                                                                  |                         |
| Z                                              | 2                                                                                            |                         |
| $\rho$ calcg/cm <sup>3</sup>                   | 1.165                                                                                        |                         |
| $\mu$ /mm <sup>-1</sup>                        | 2.97                                                                                         |                         |
| F(000)                                         | 1012                                                                                         |                         |
| Crystal size/mm <sup>3</sup>                   | 0.17 × 0.1 × 0.08                                                                            |                         |
| Radiation                                      | CuK $\alpha$                                                                                 | ( $\lambda = 1.54184$ ) |
| 2 $\Theta$ range for data collection/ $^\circ$ | 9.49 to 140.838                                                                              |                         |

|                                             |                                          |
|---------------------------------------------|------------------------------------------|
| Index ranges                                | -14 ≤ h ≤ 19, -13 ≤ k ≤ 10, -20 ≤ l ≤ 19 |
| Reflections collected                       | 24007                                    |
| Independent reflections                     | 9306 [Rint = 0.0461, Rsigma = 0.0588]    |
| Data/restraints/parameters                  | 9306/67/556                              |
| Goodness-of-fit on F2                       | 1.027                                    |
| Final R indexes [I ≥ 2σ(I)]                 | R1 = 0.0890, wR2 = 0.2295                |
| Final R indexes [all data]                  | R1 = 0.1093, wR2 = 0.2561                |
| Largest diff. peak/hole / e Å <sup>-3</sup> | 0.60/-0.27                               |
| Flack parameter                             | -0.01(2)                                 |

Single crystal of **3ac** was obtained by slow evaporation from PE/DCM (V=4/1) at 25 °C. ORTEP diagram of compound **3ac**, the ellipsoid contour probability levels: 50%

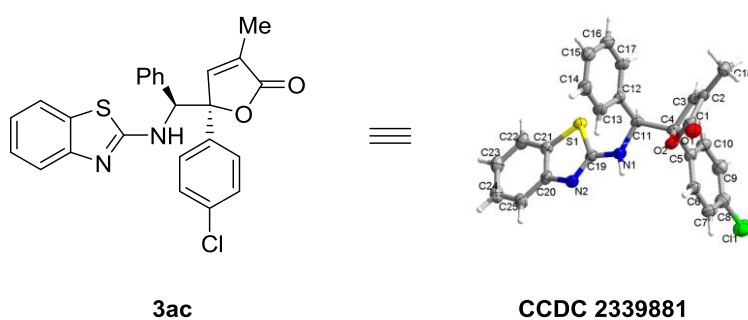

**Figure S1.** ORTEP plot of compound **3ac**

Thermal ellipsoids are drawn at 50% probability level.

## 7. HPLC, NMR spectra of products

### 7.1 NMR spectra

#### 3aa

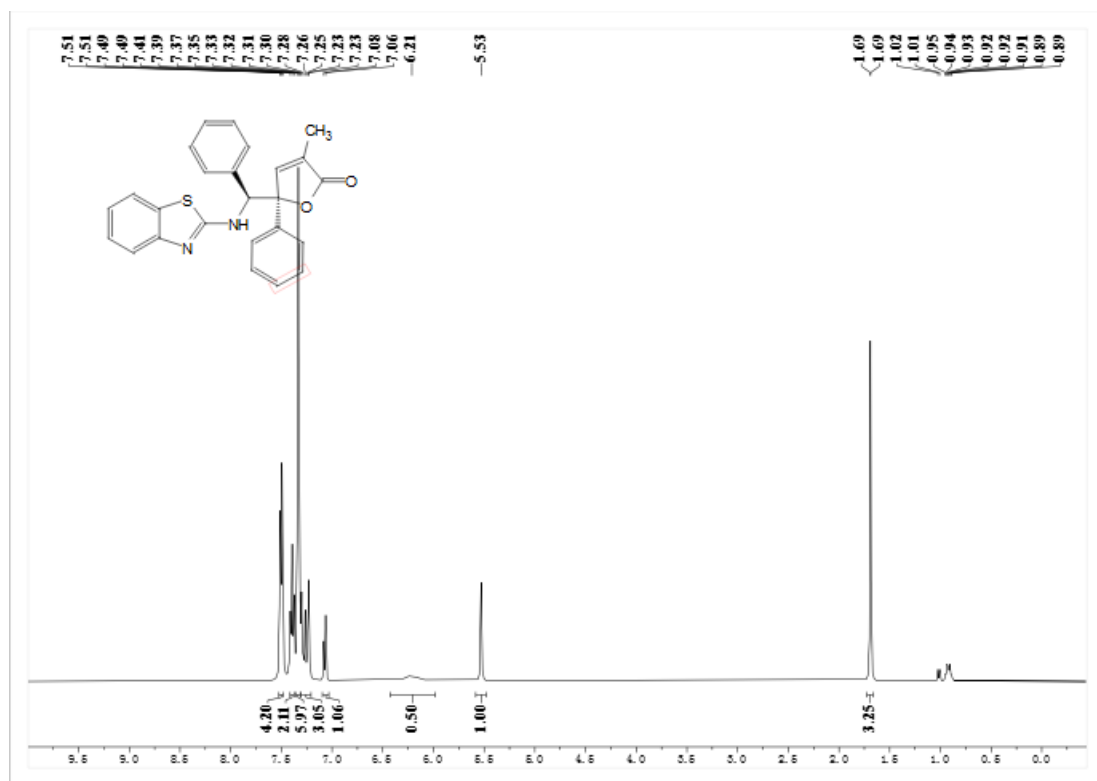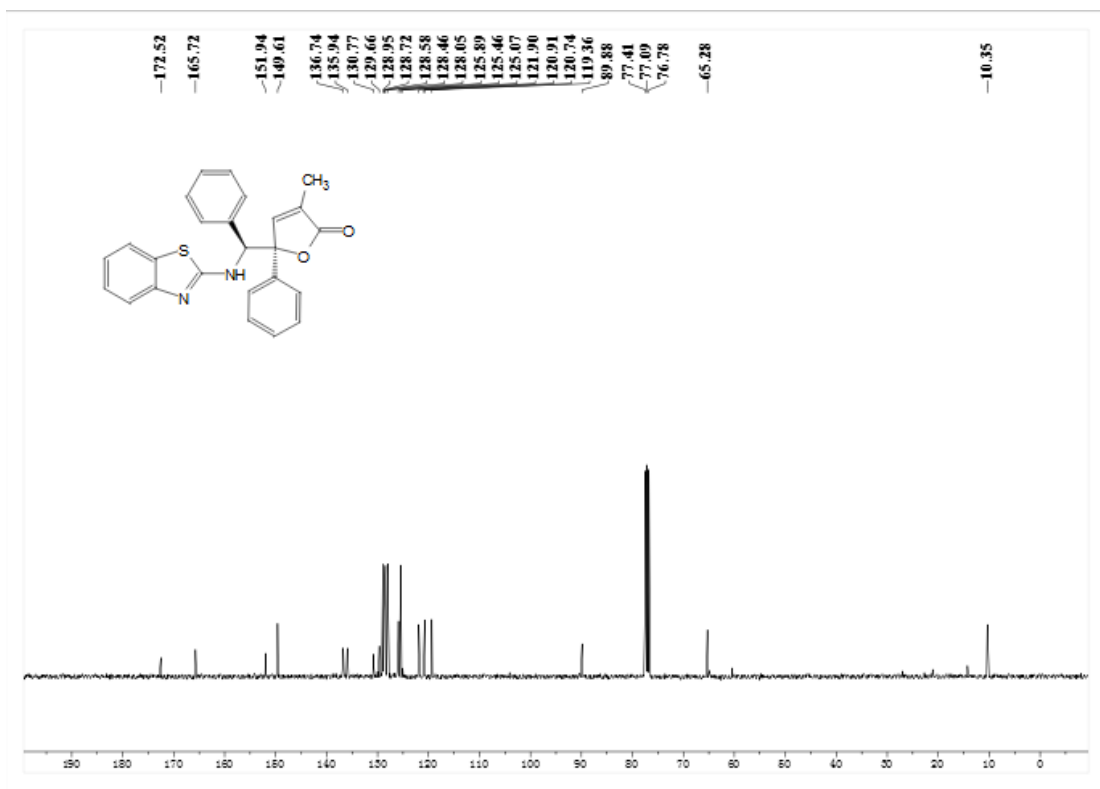

3ba

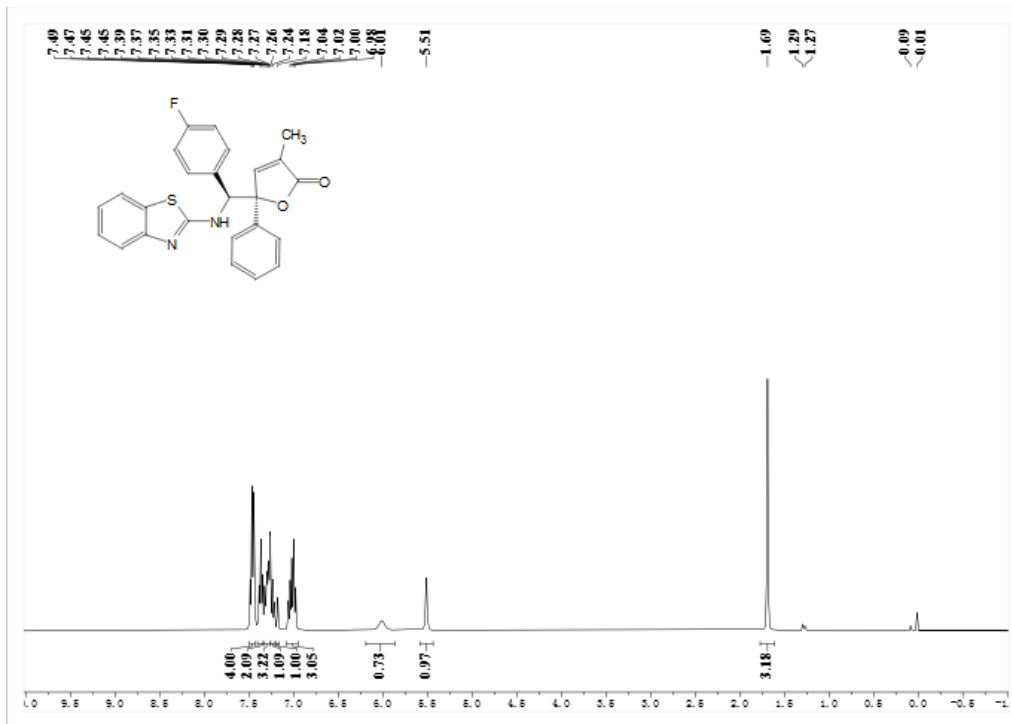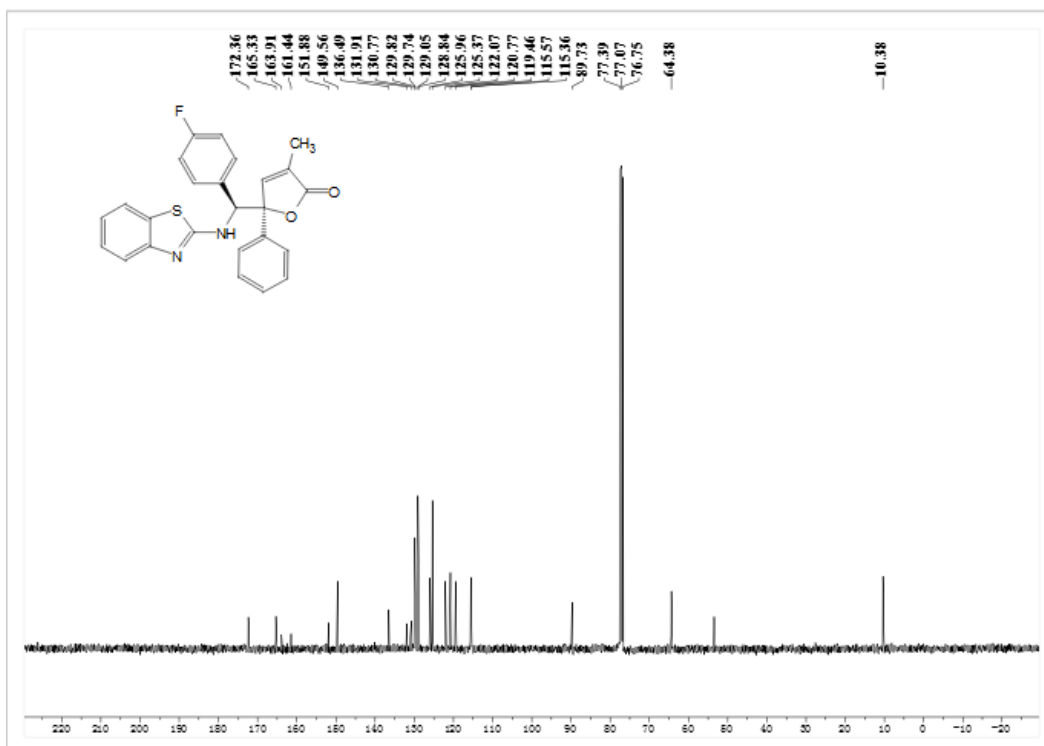

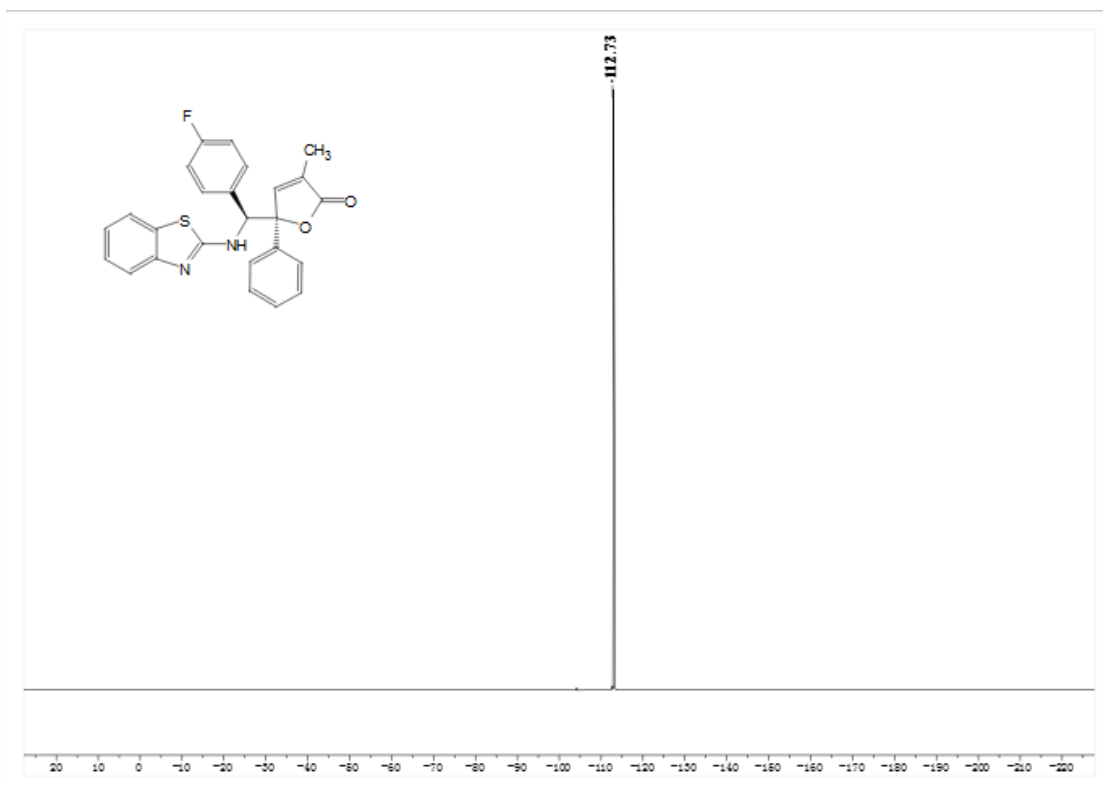

3ca

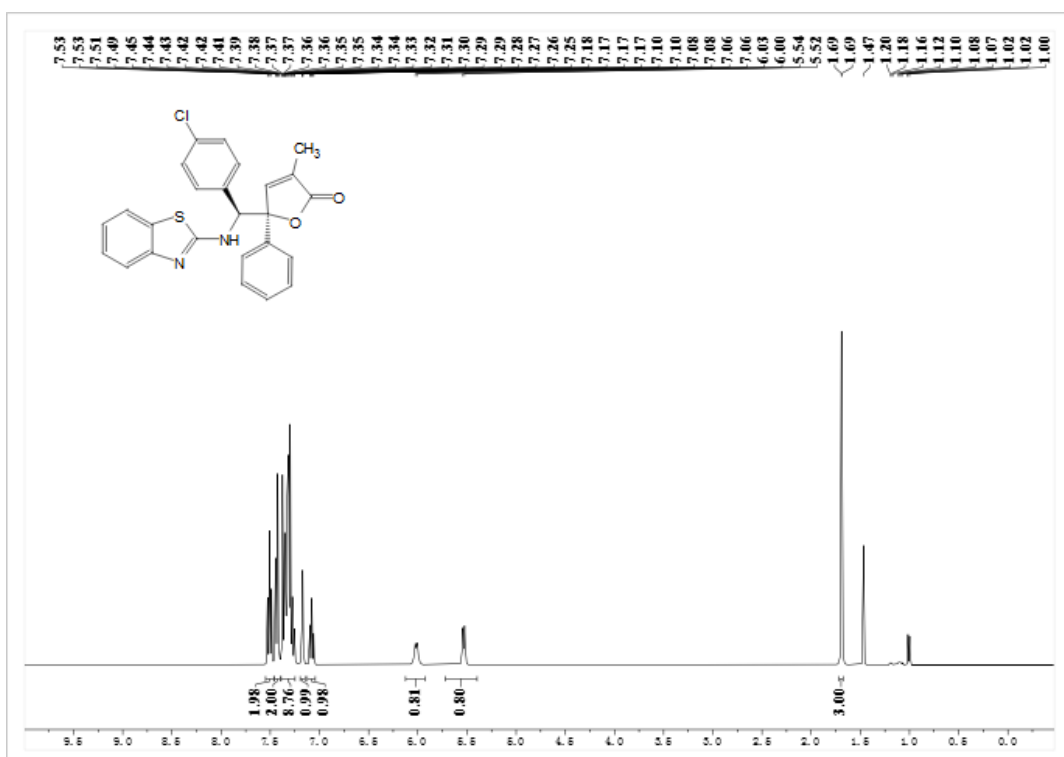

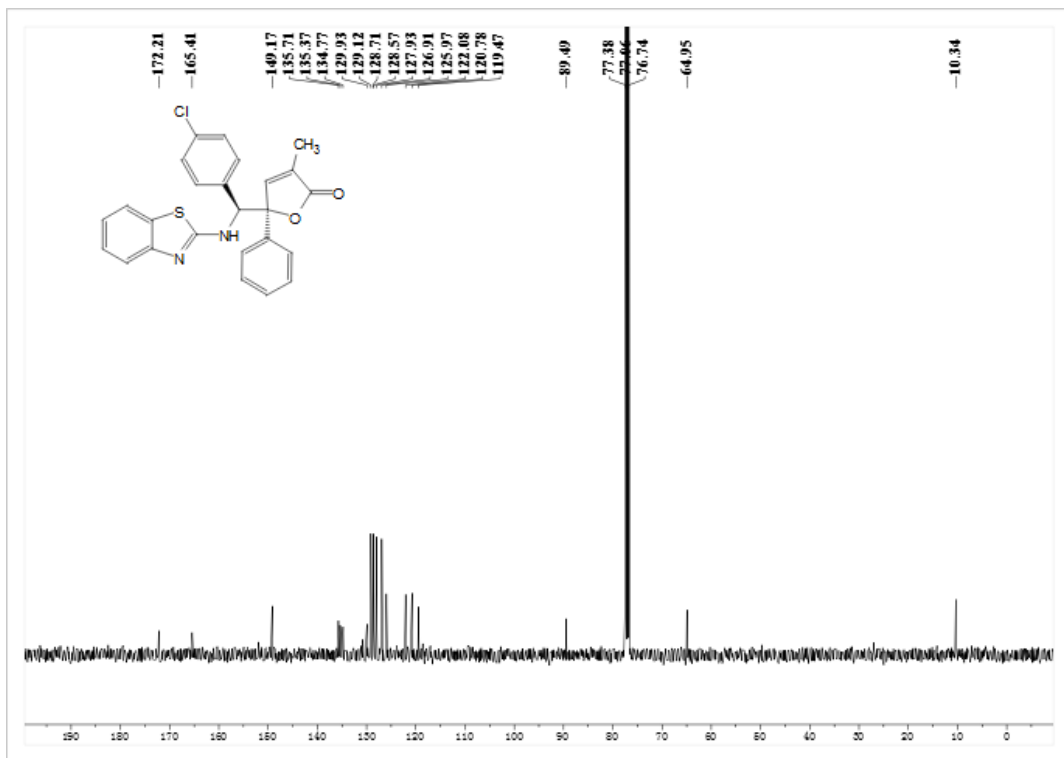

### 3da

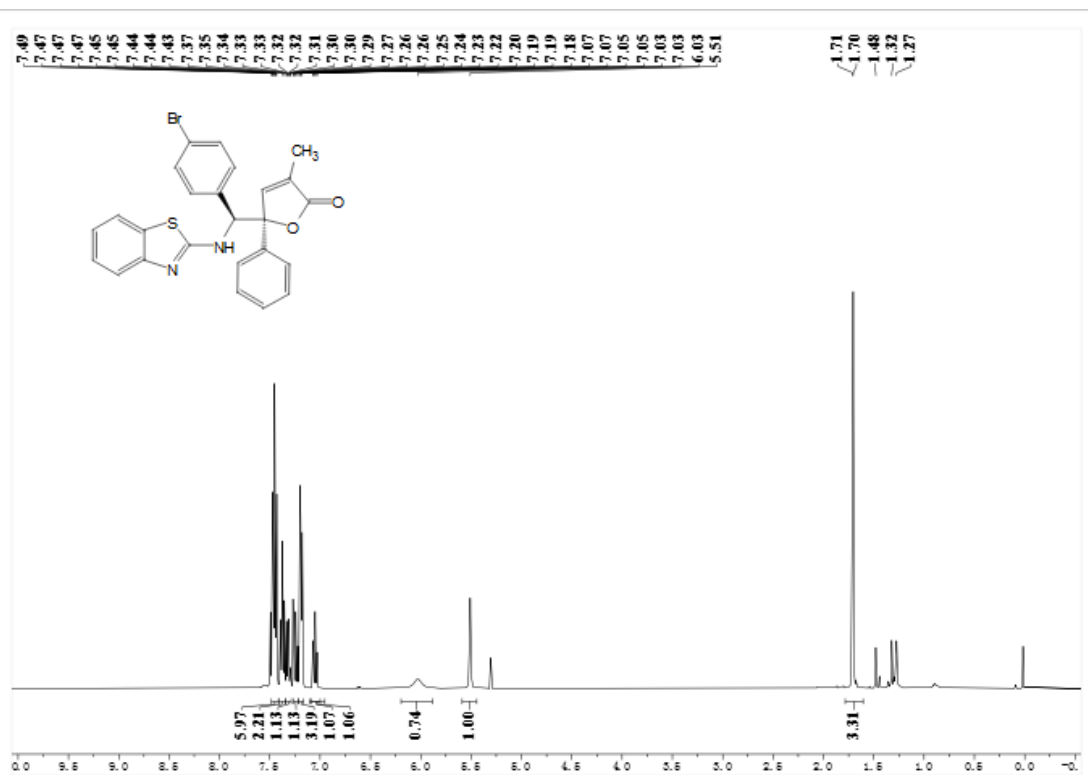



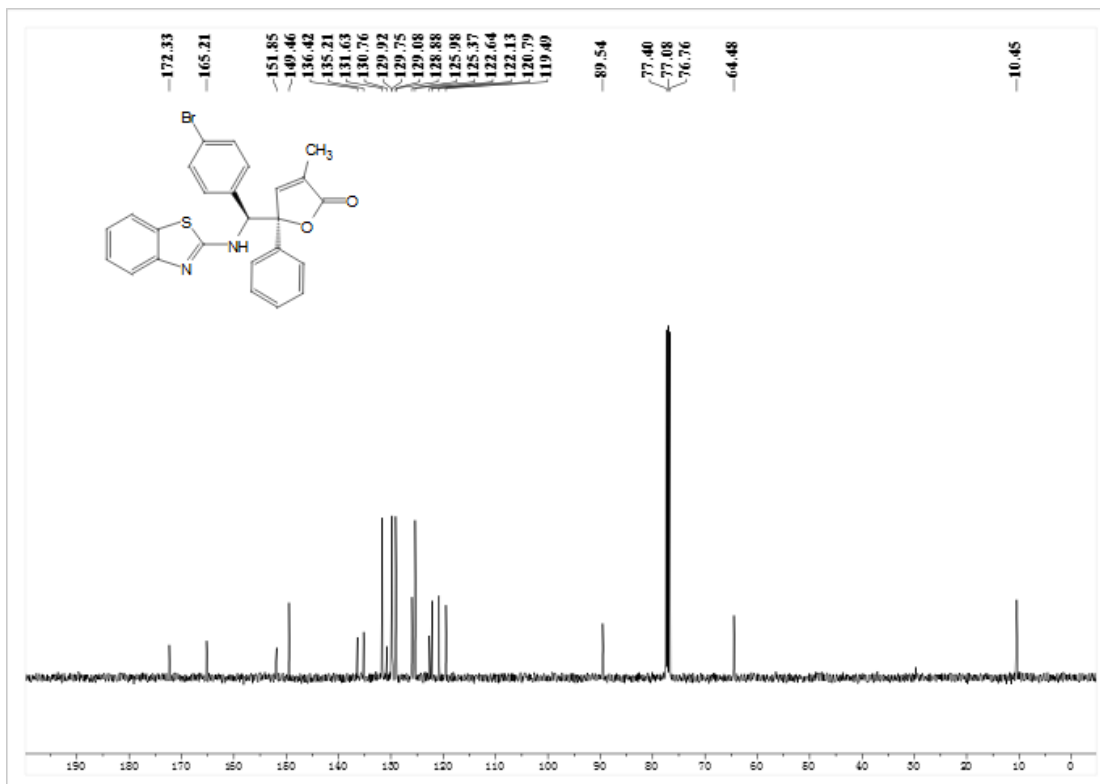

3ea

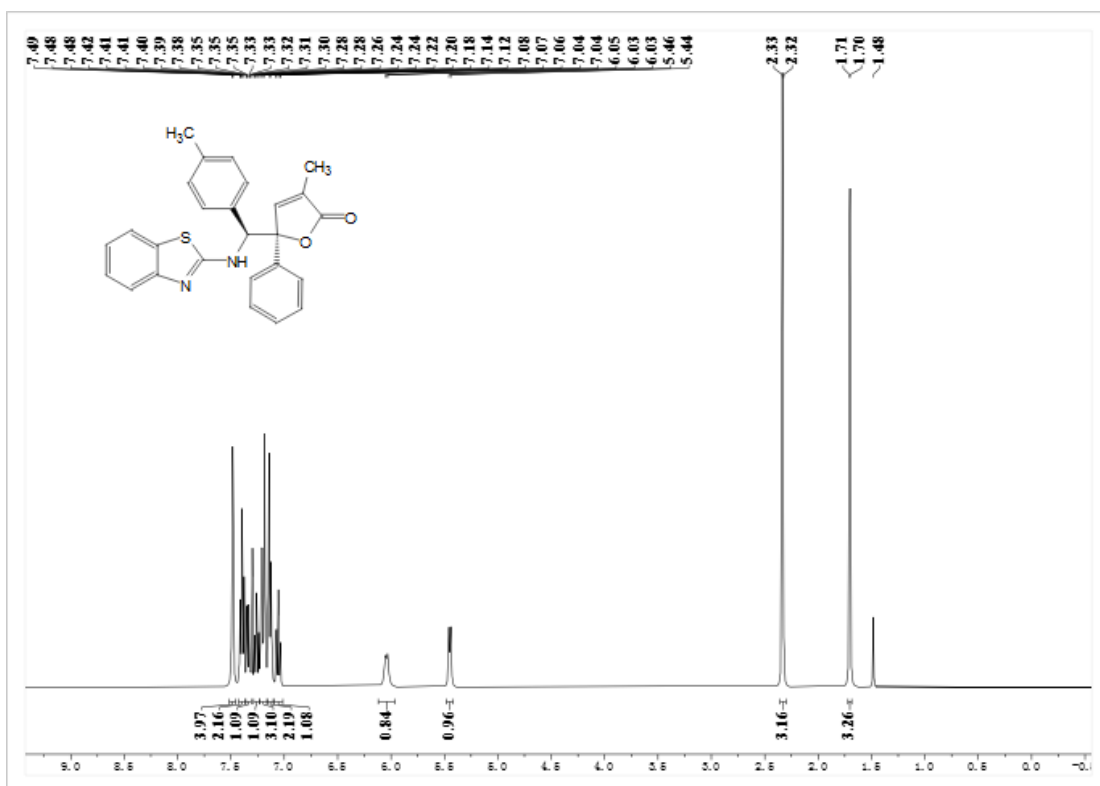

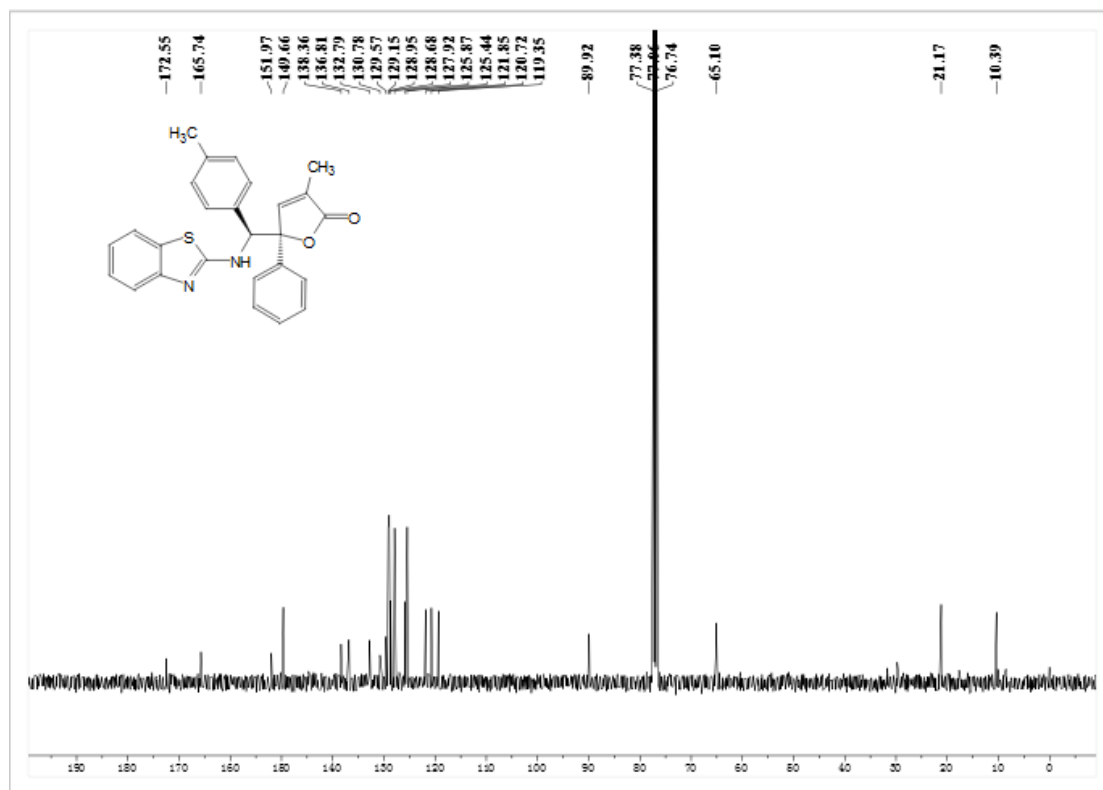

3fa

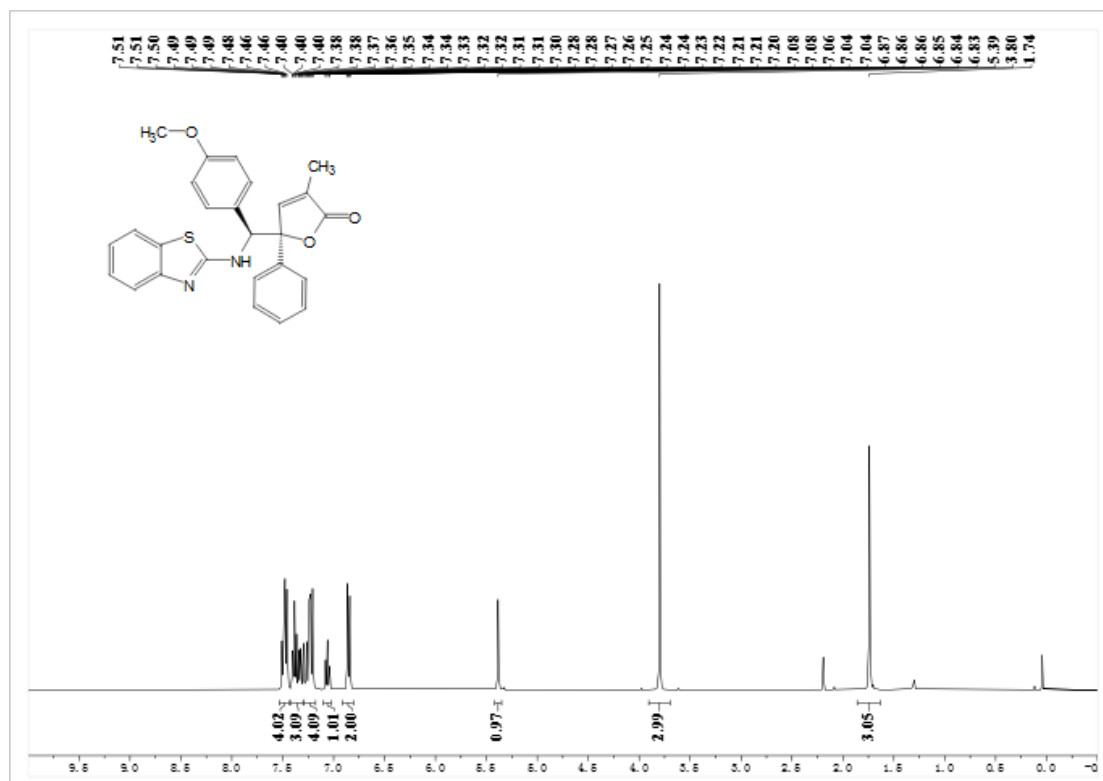

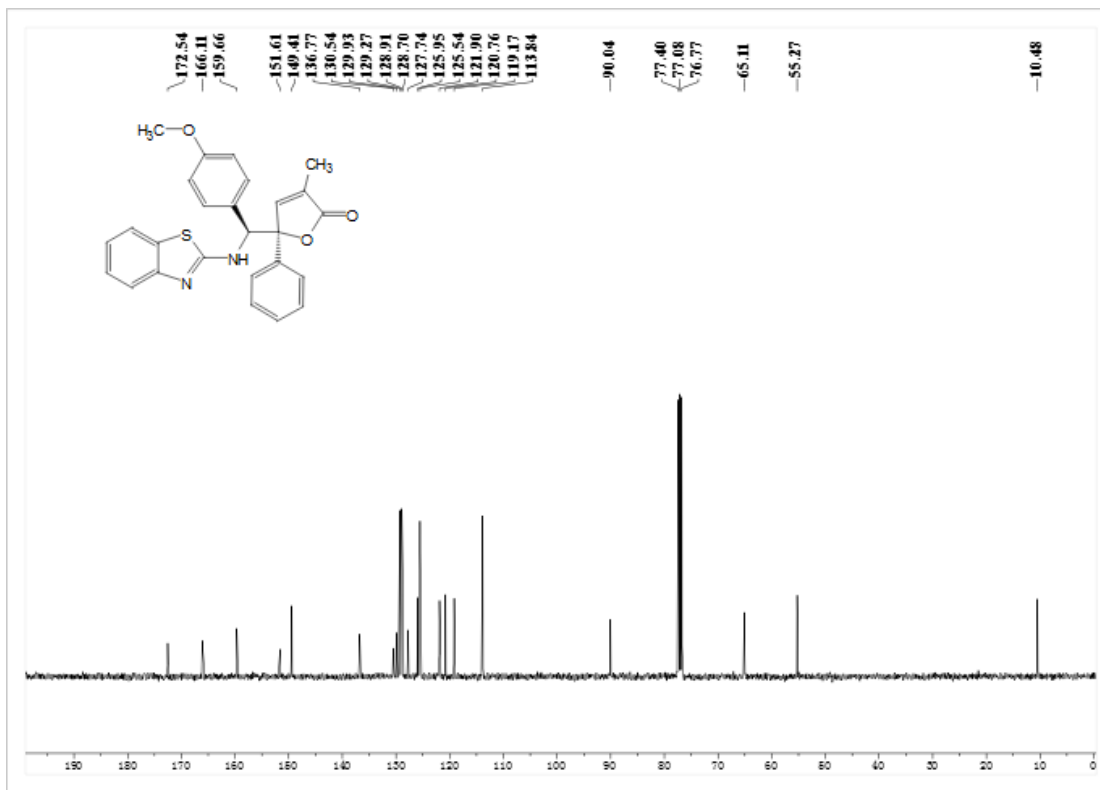

3ga

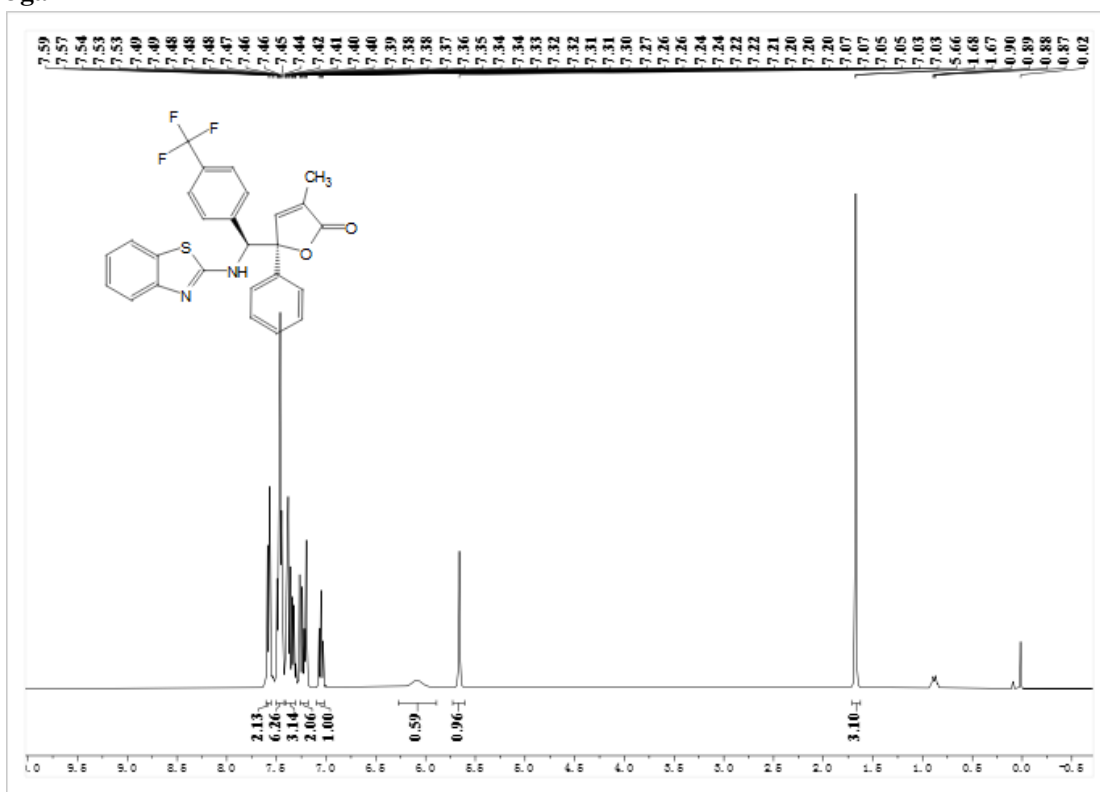

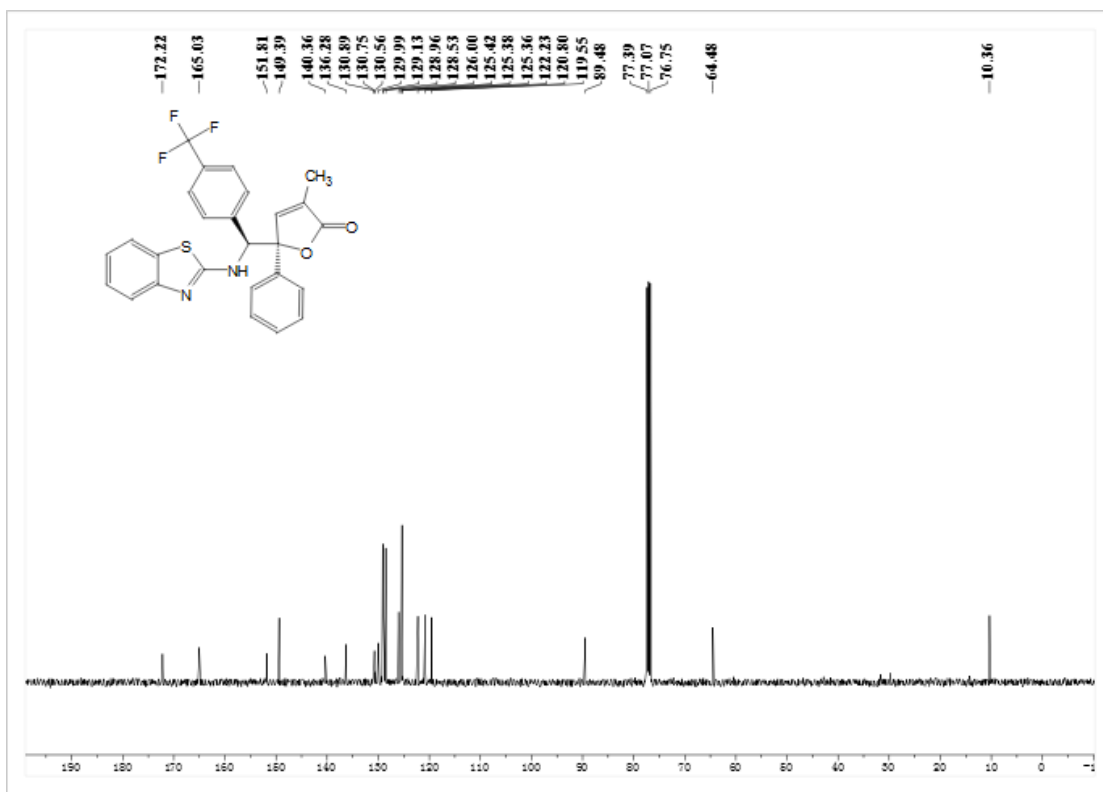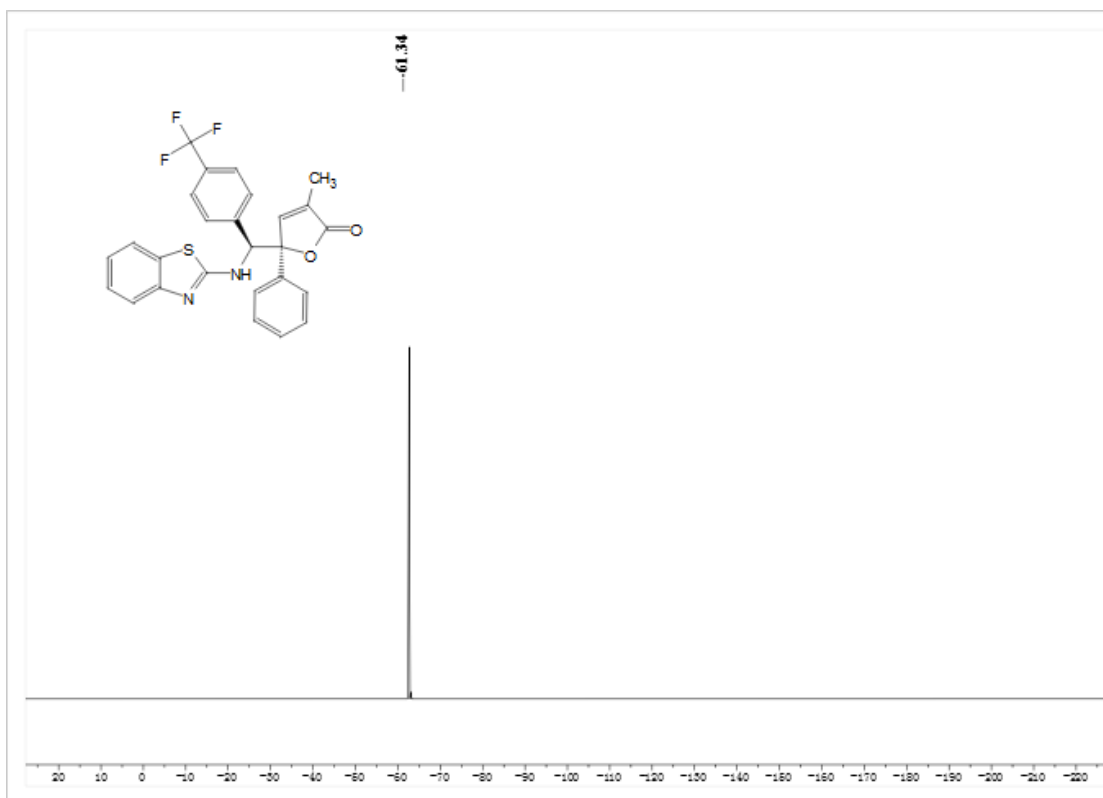

3ha

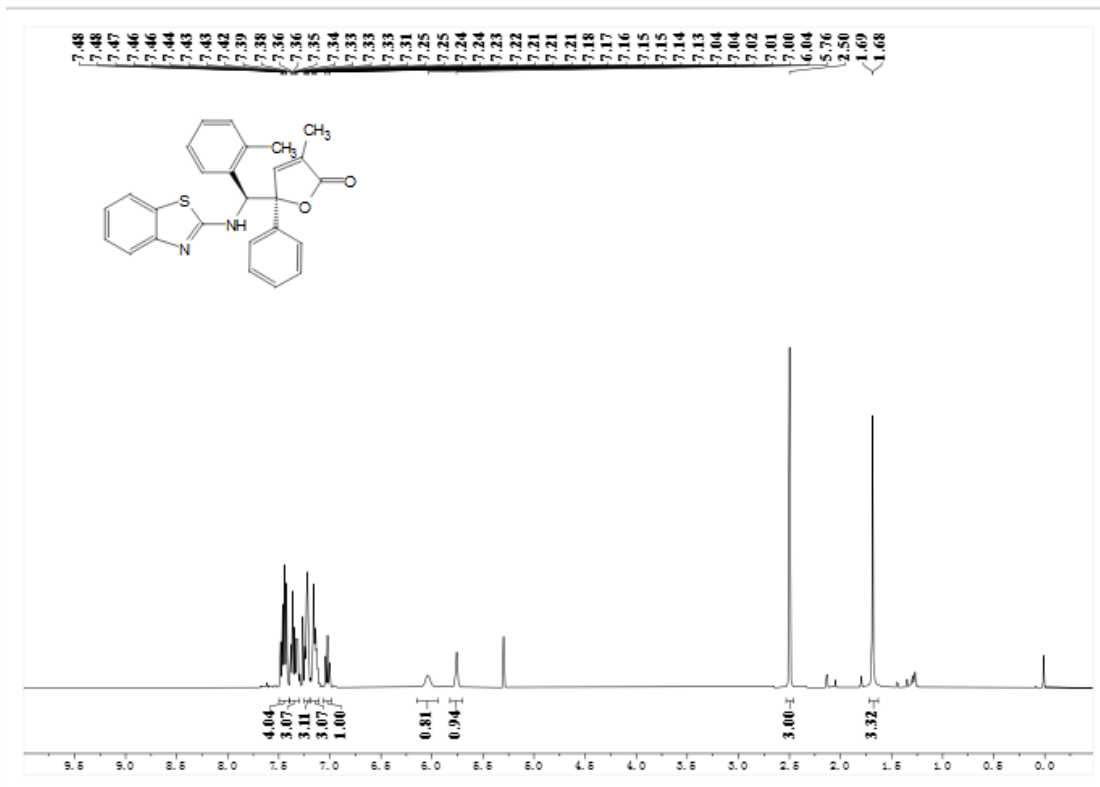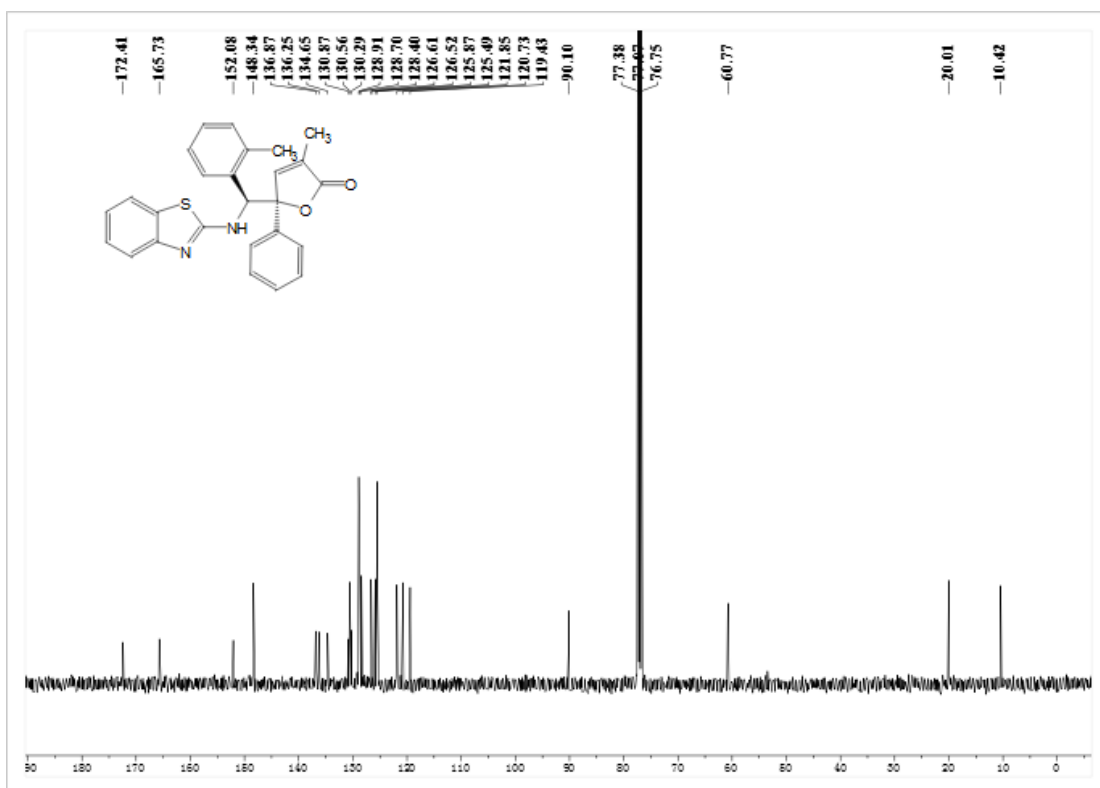

3ia

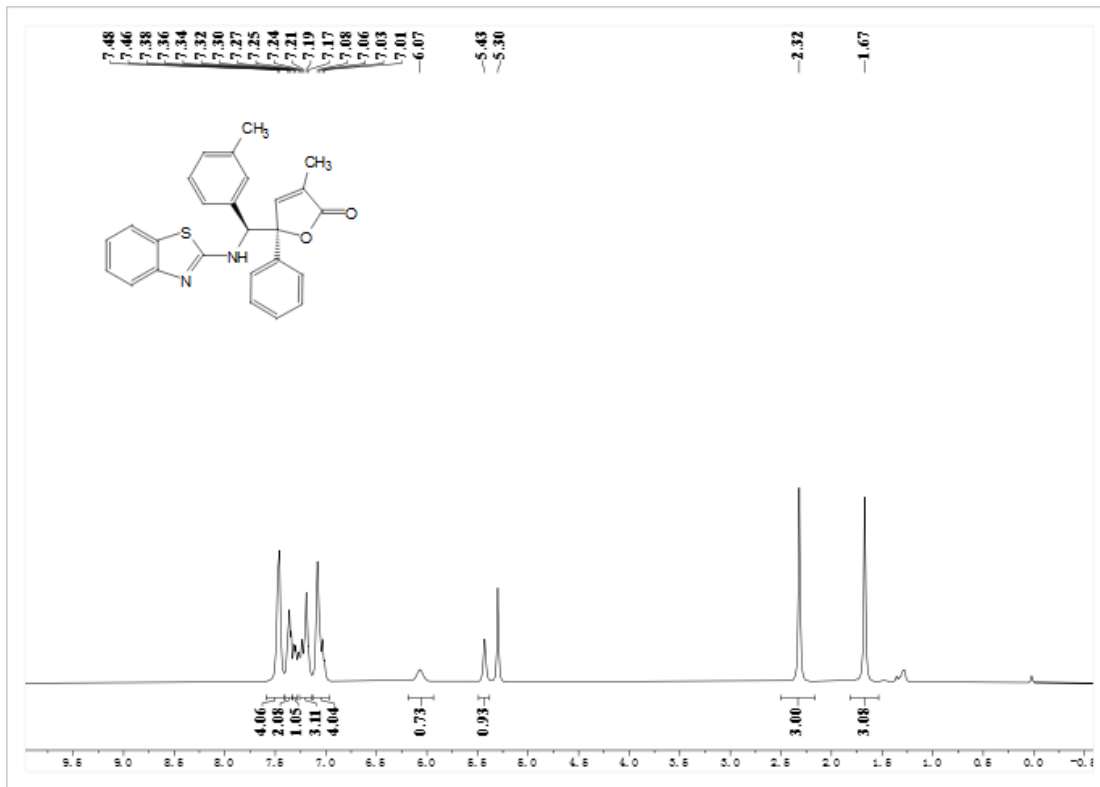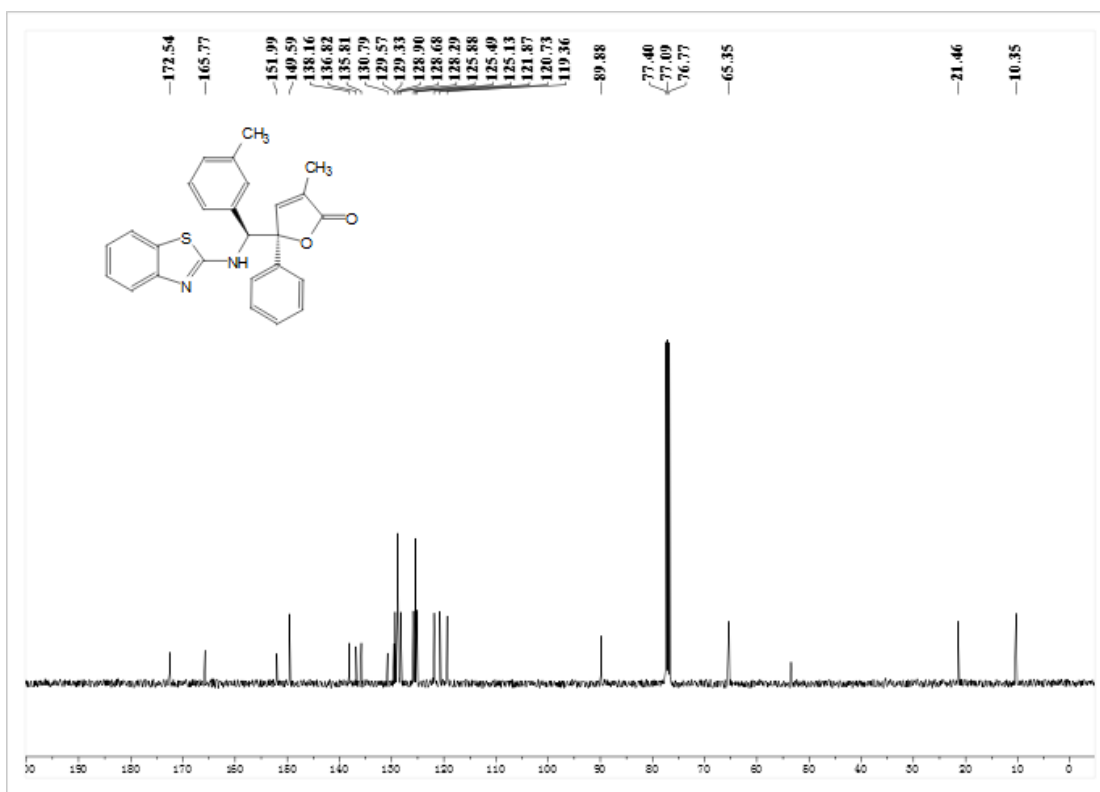

3ja

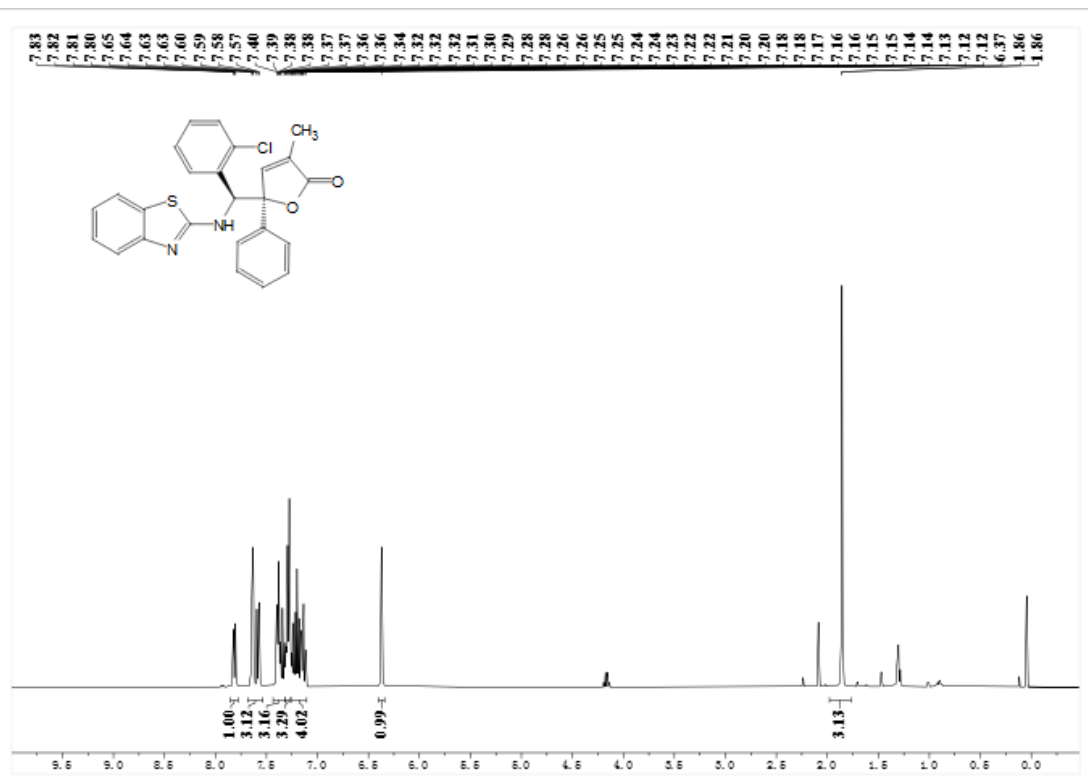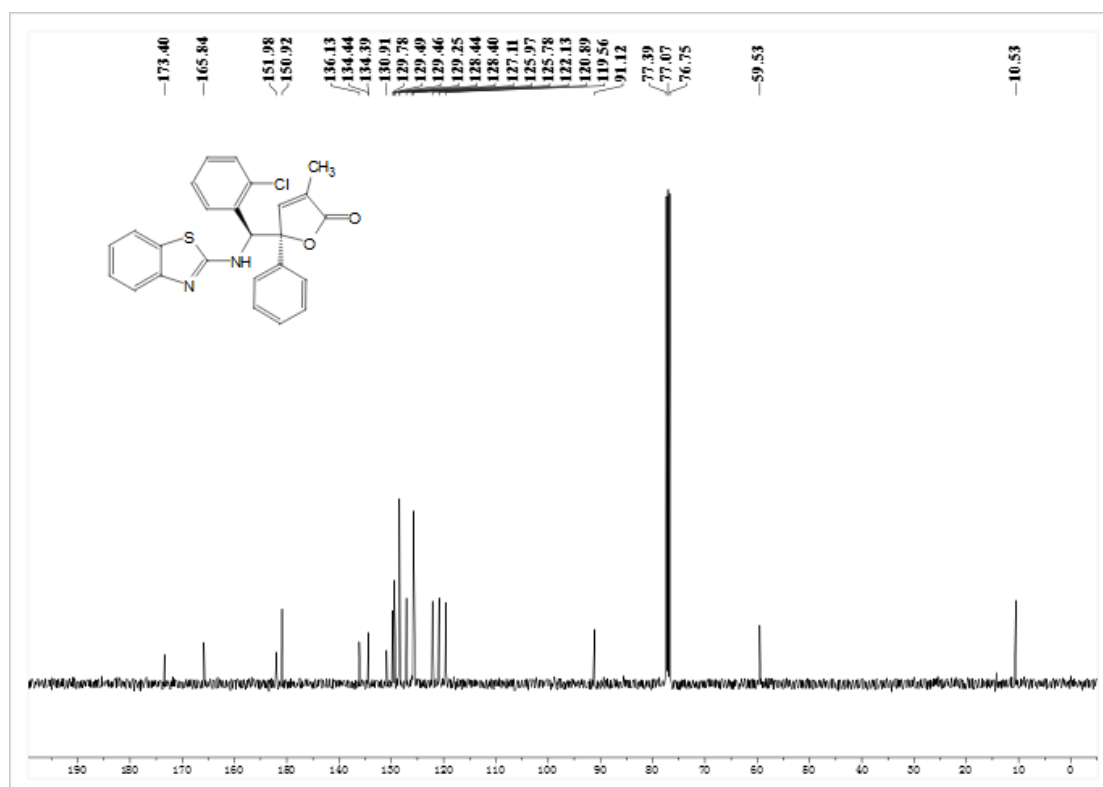

3ka

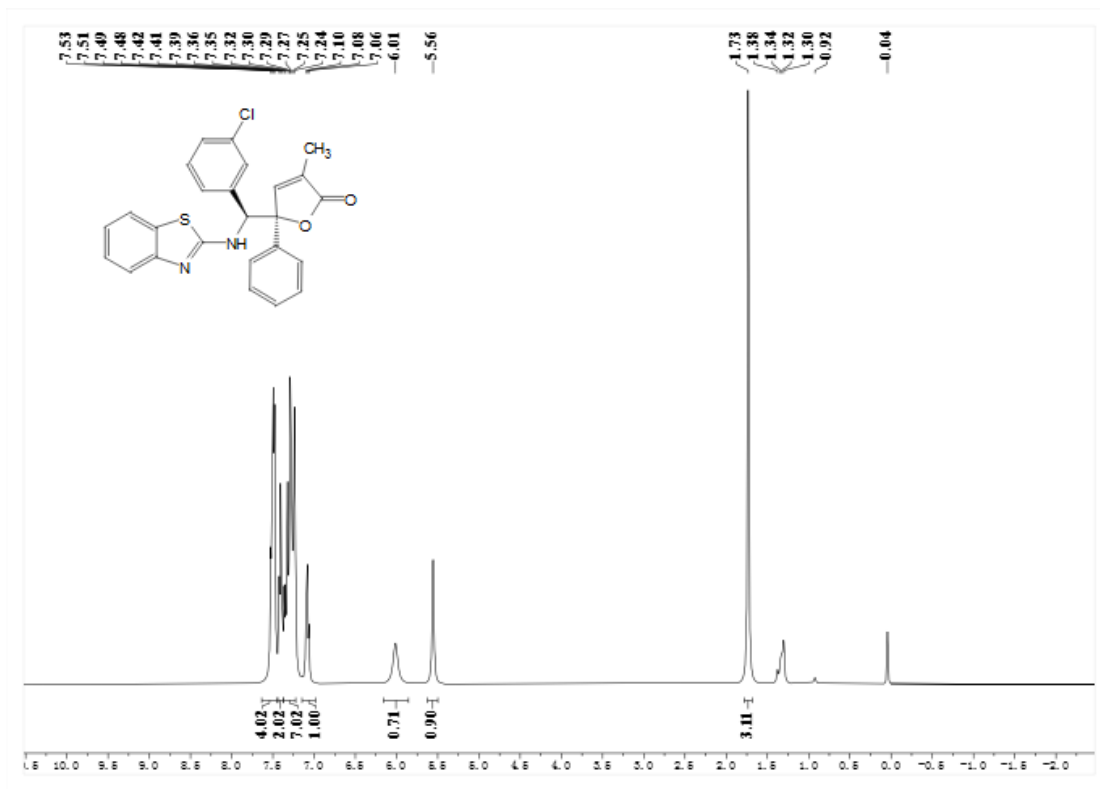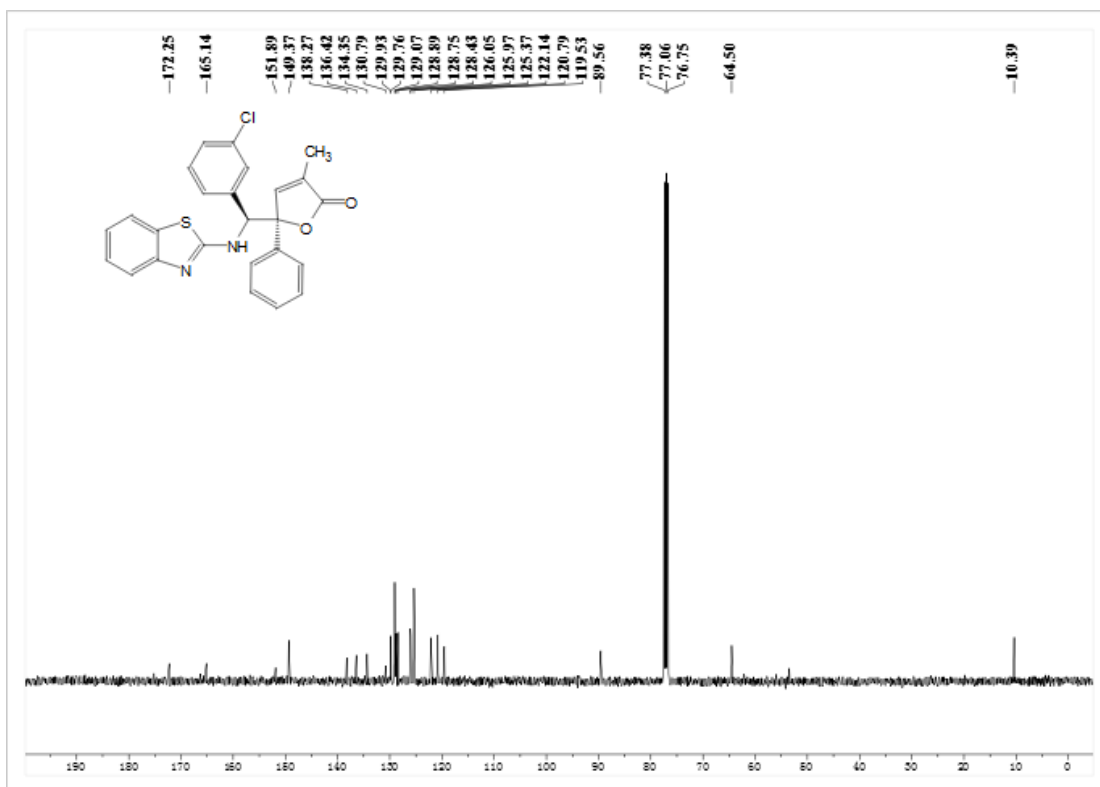



3la

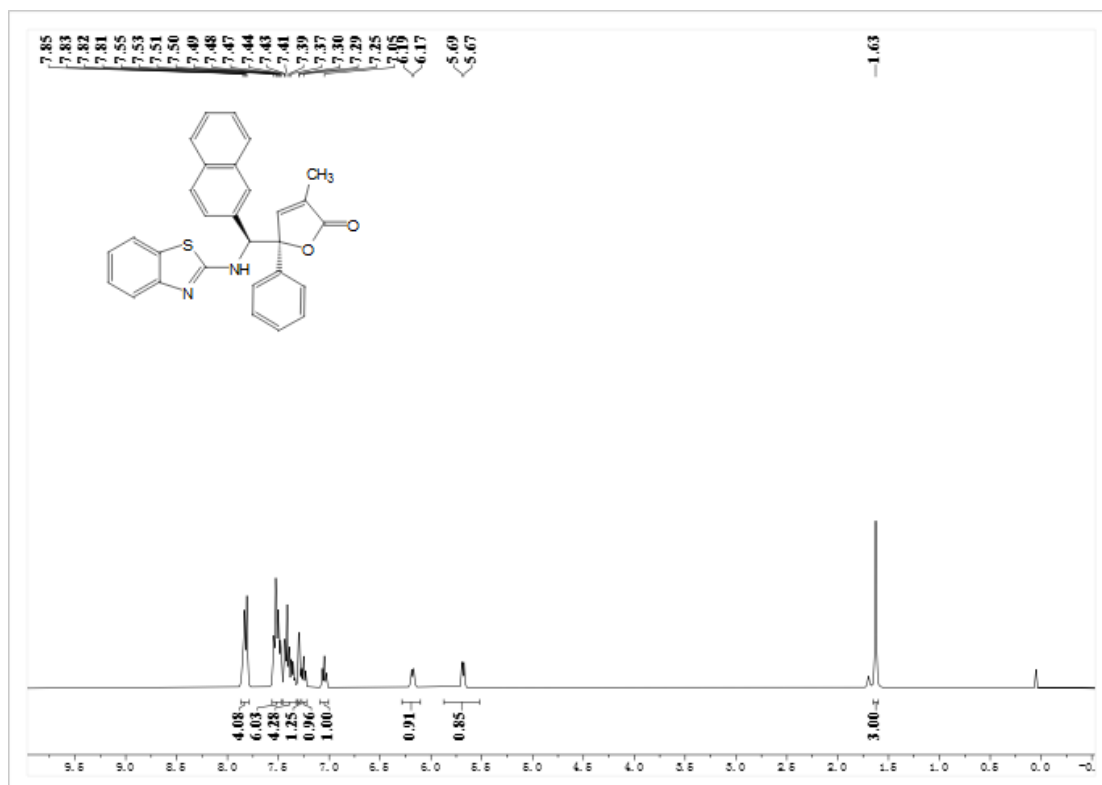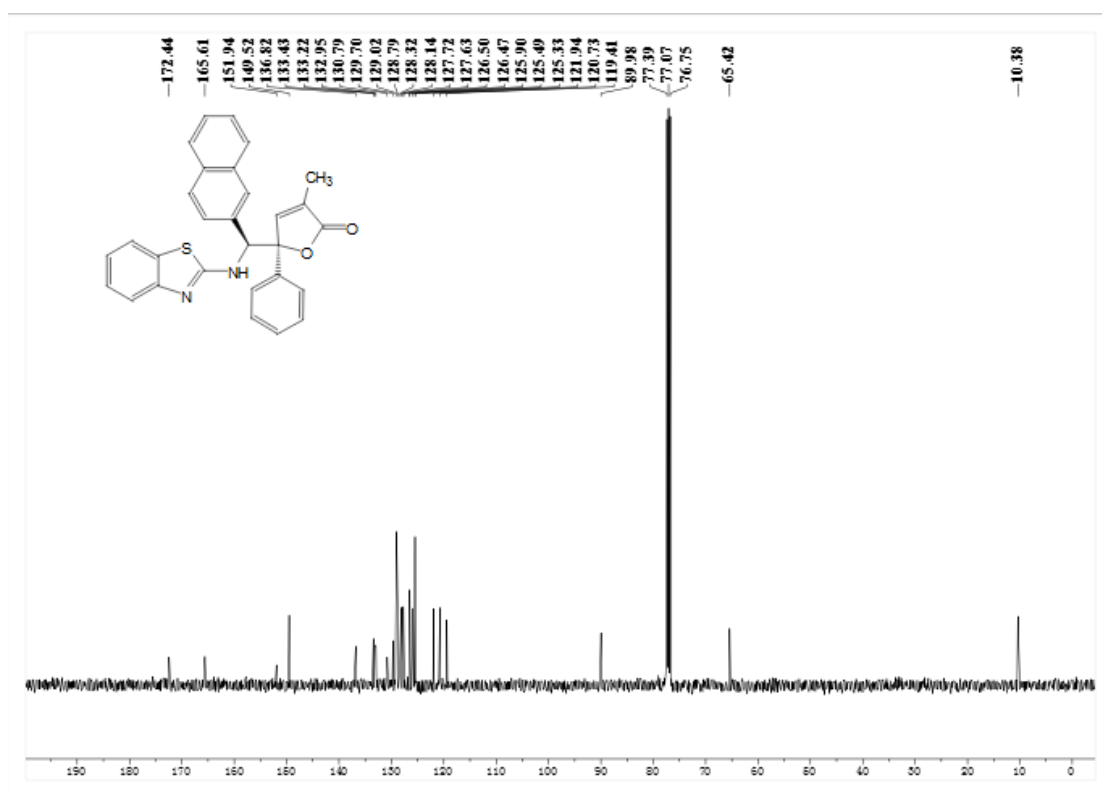

3ma

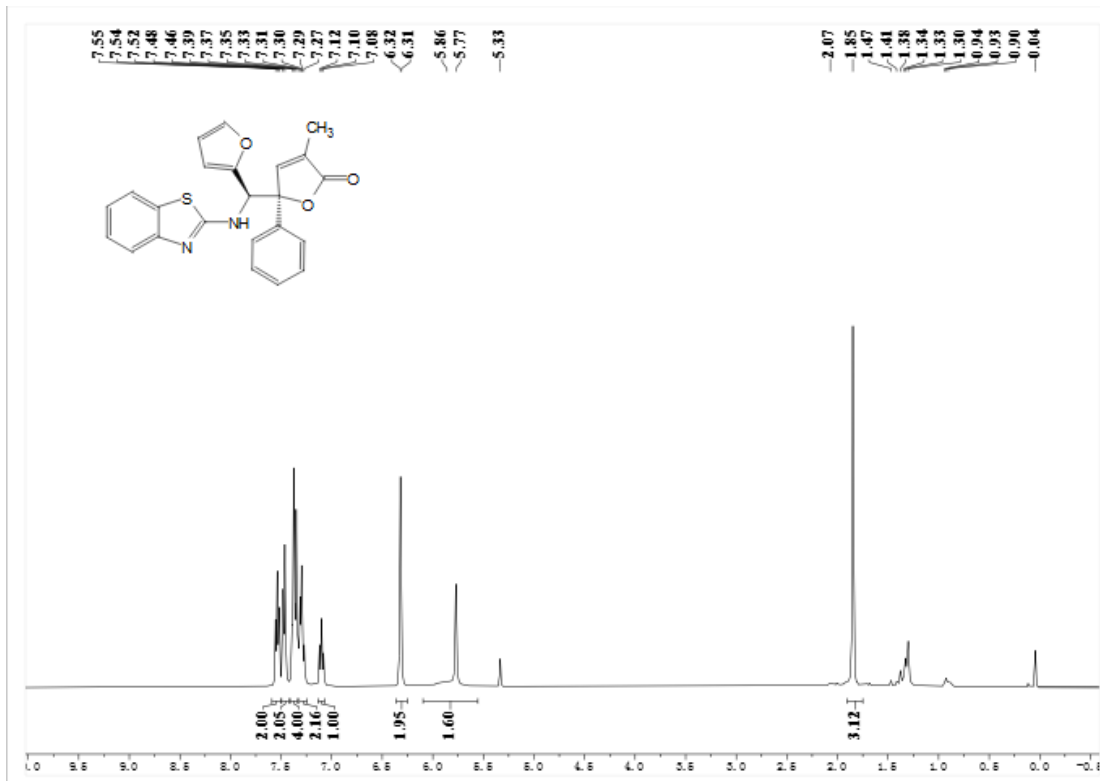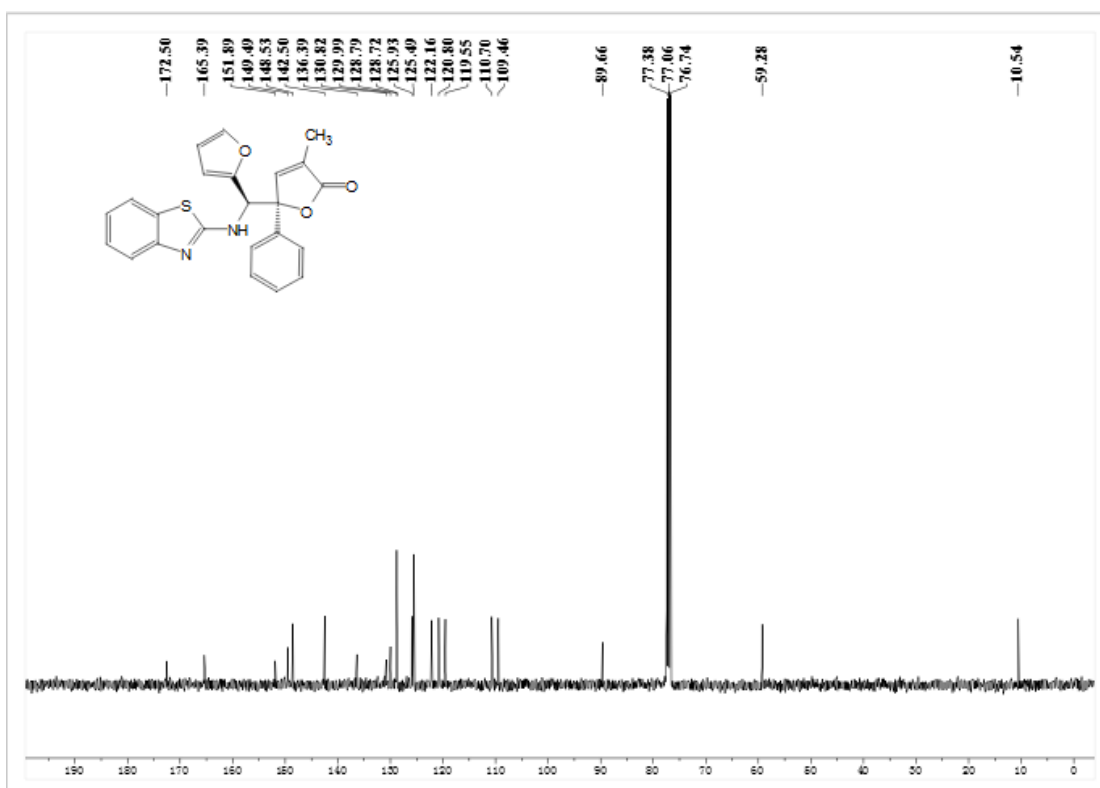

3na

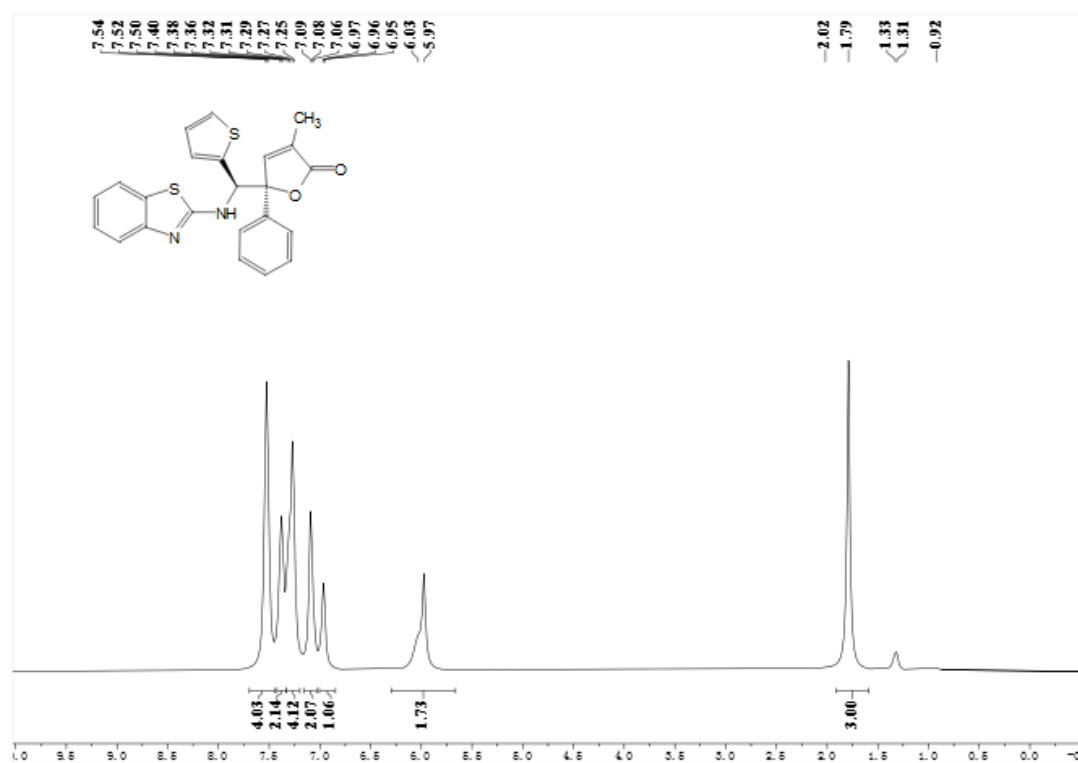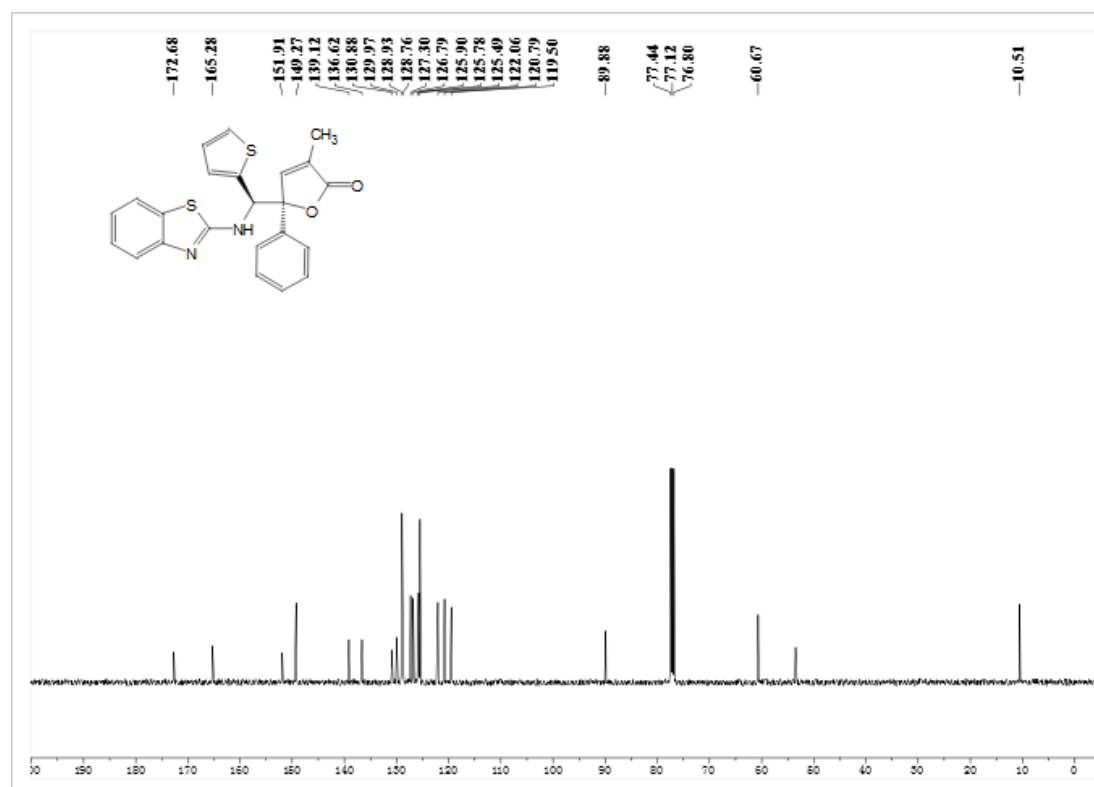

30a

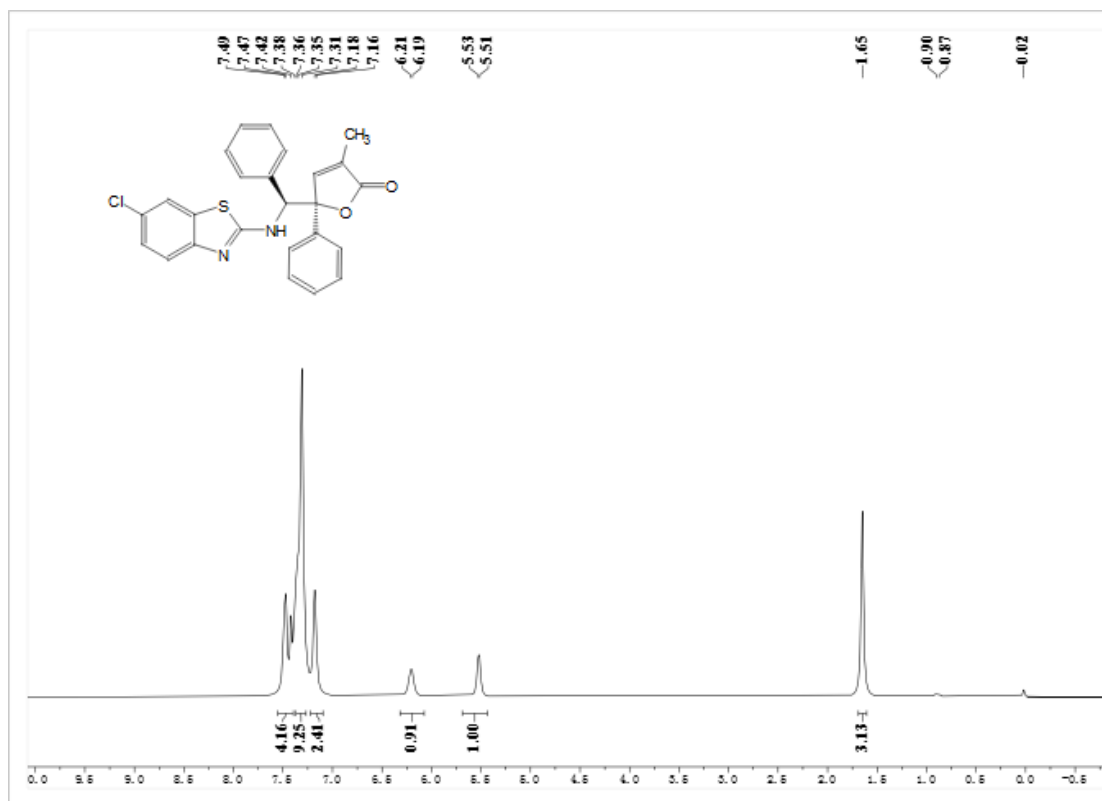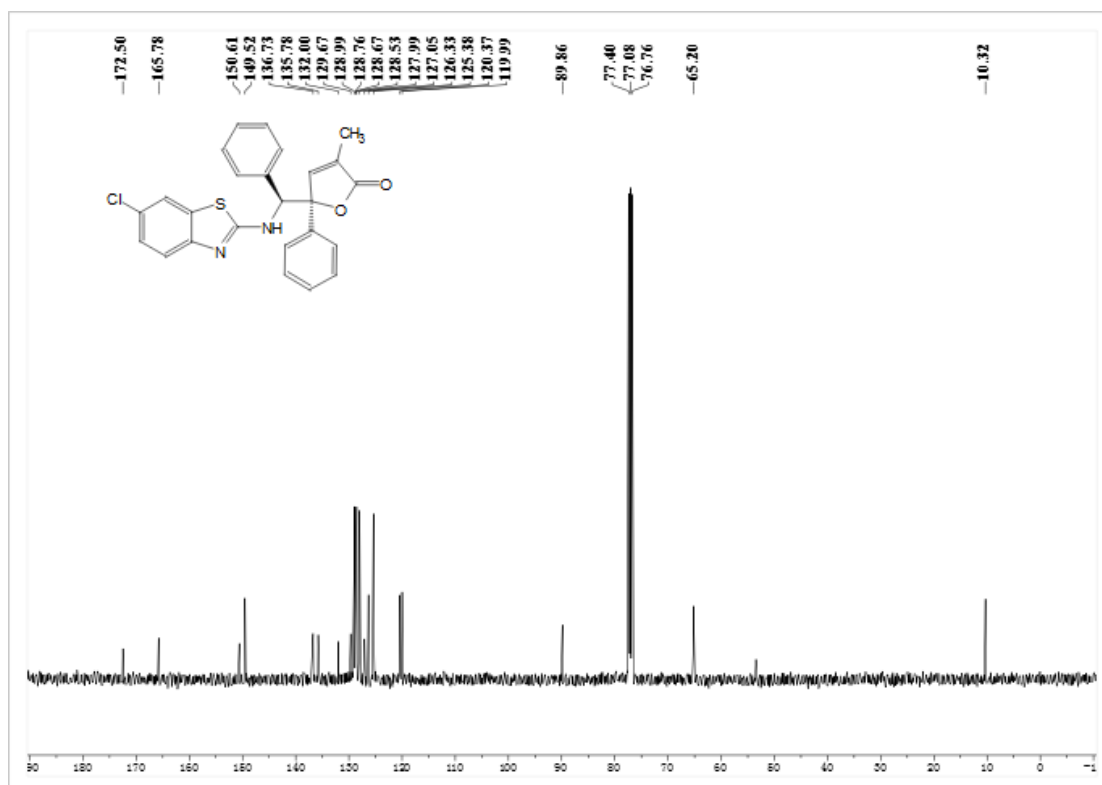

3pa

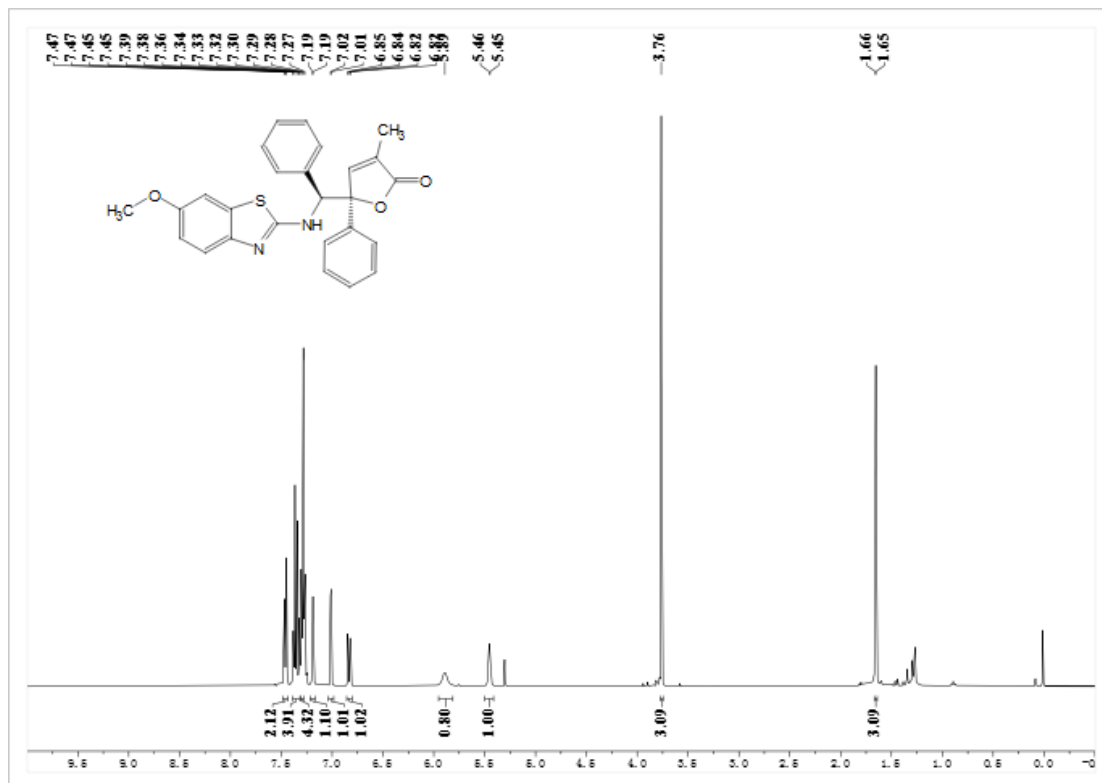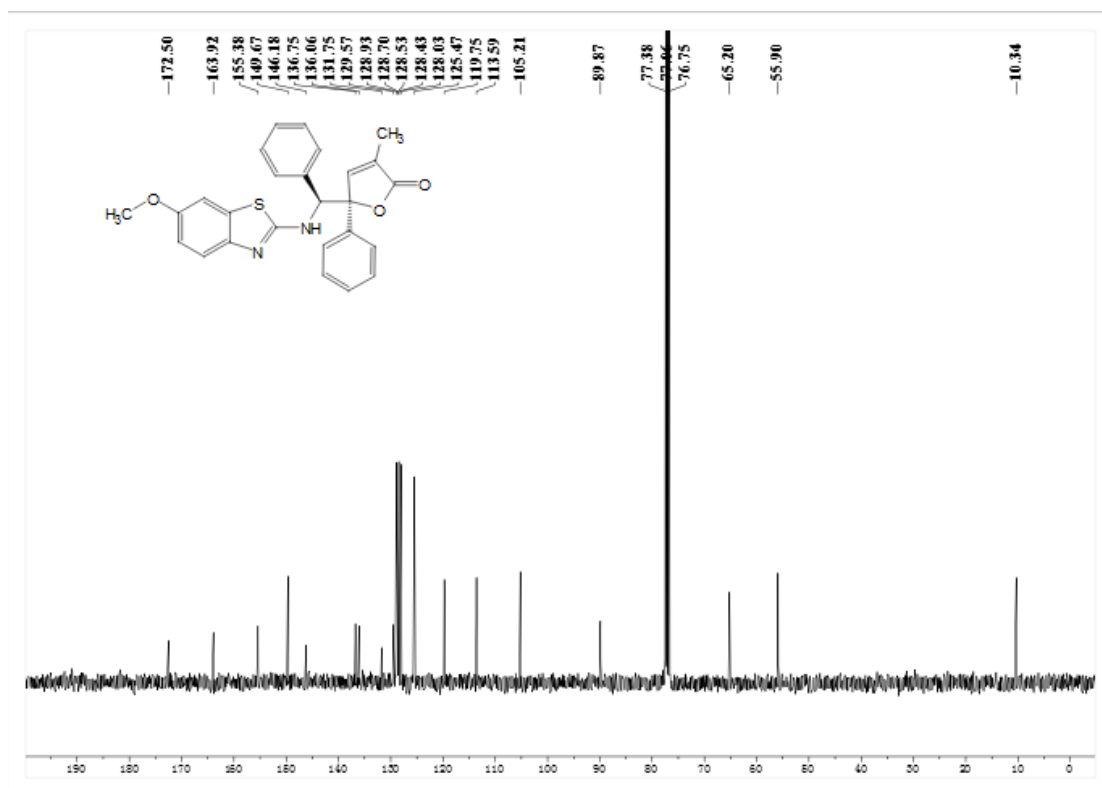

3qa

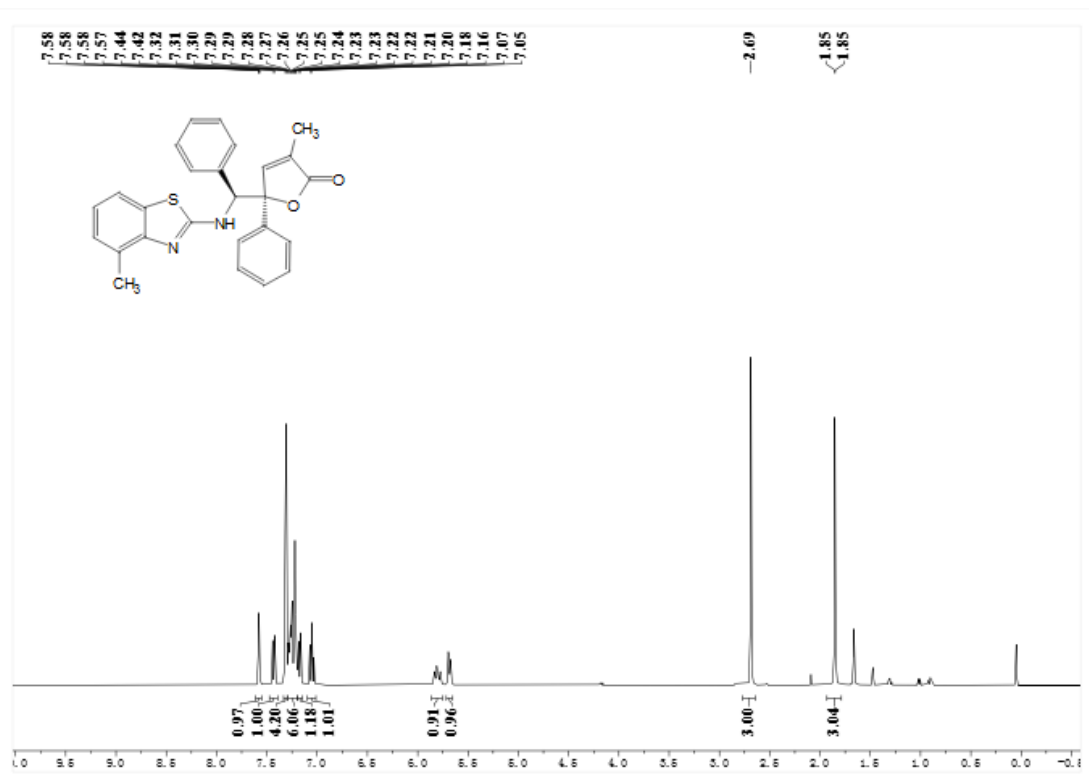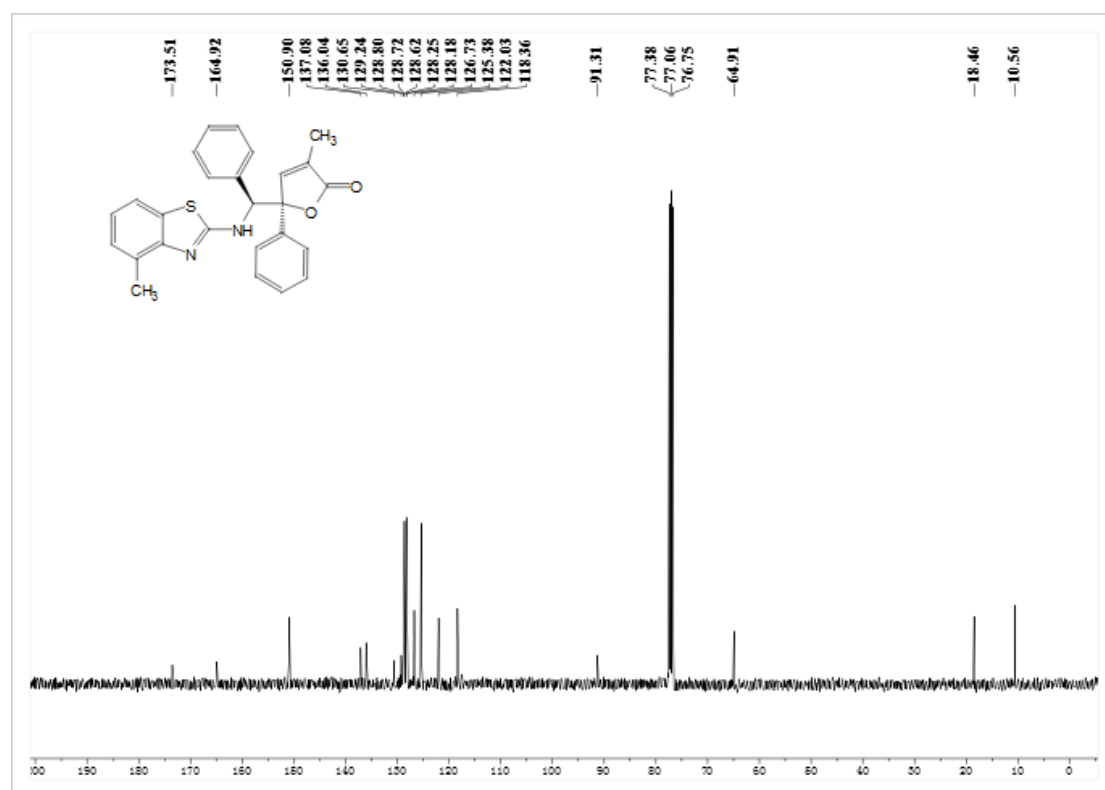

3ab

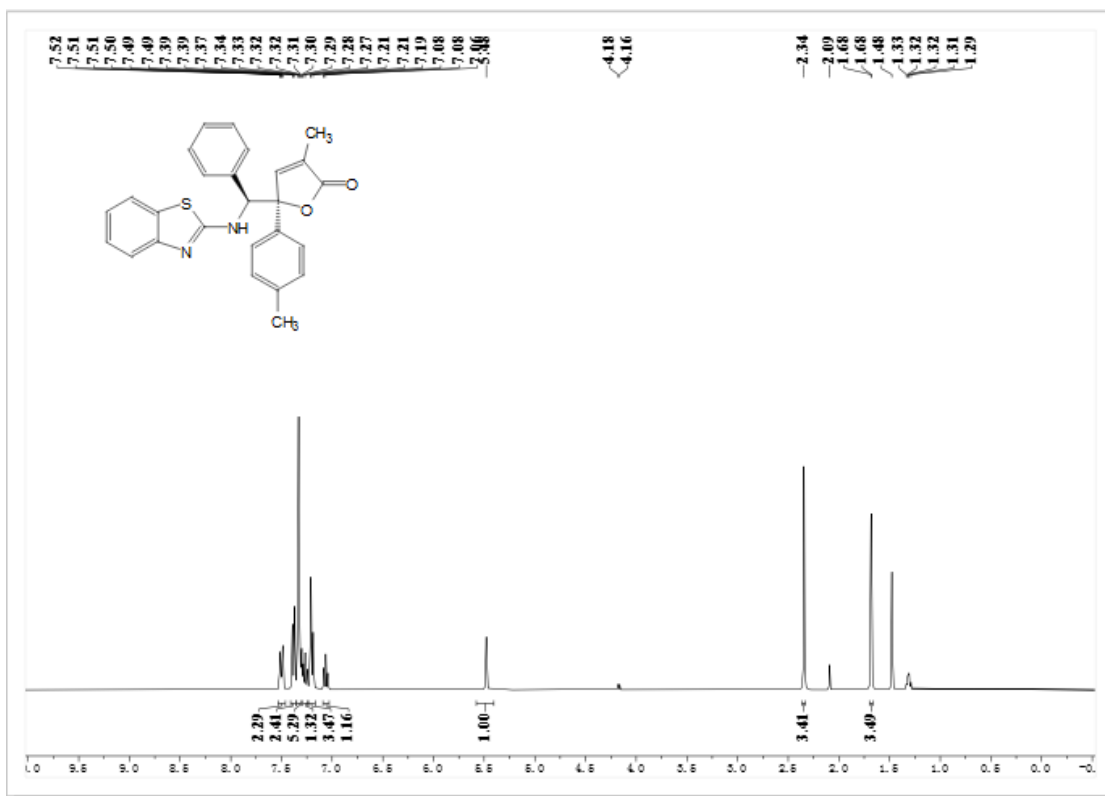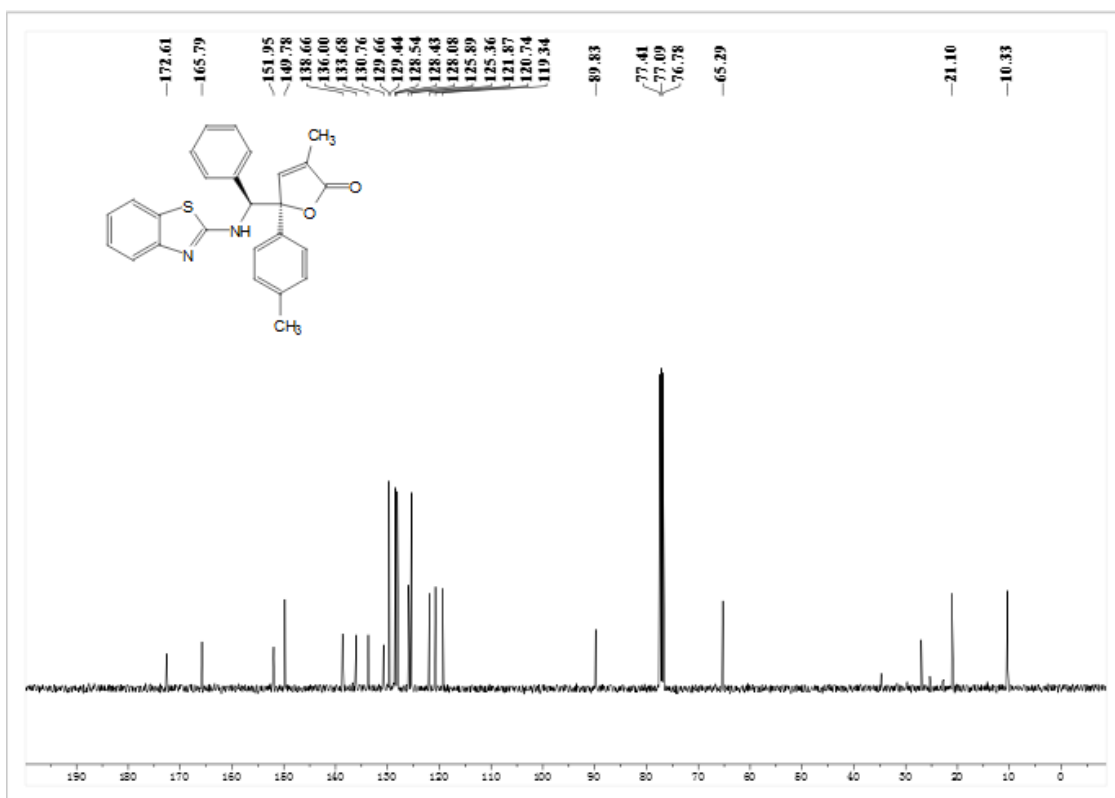

3ac

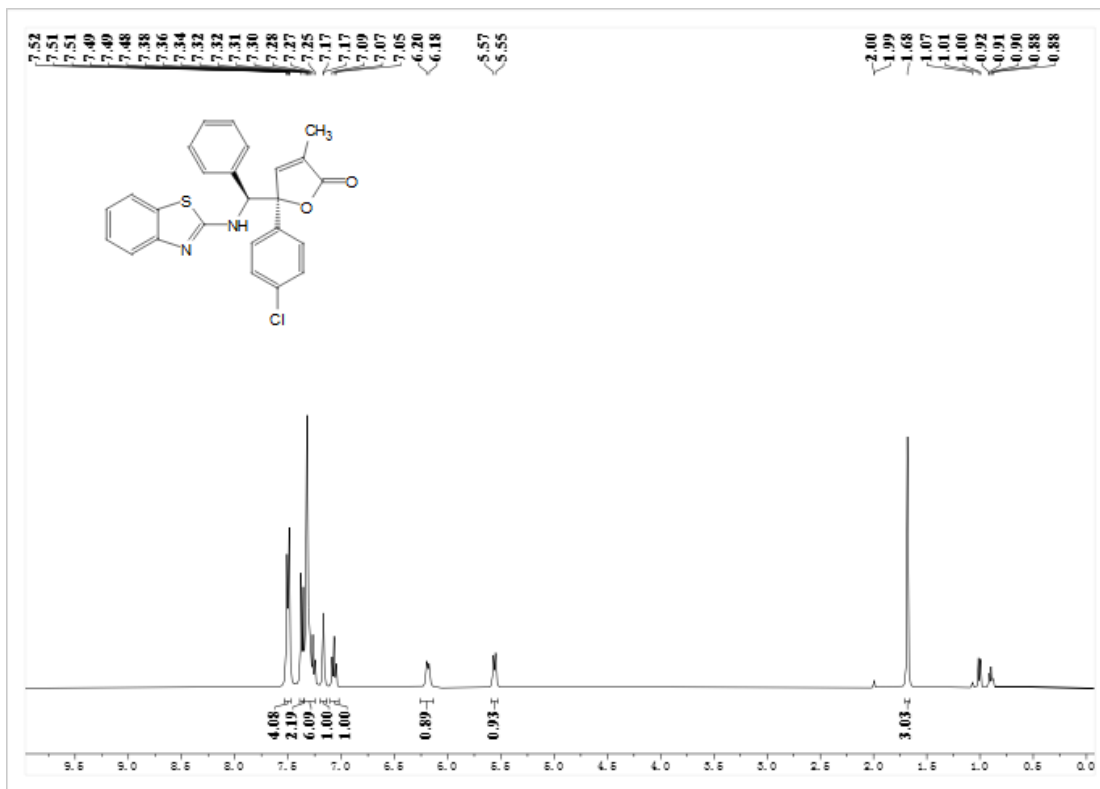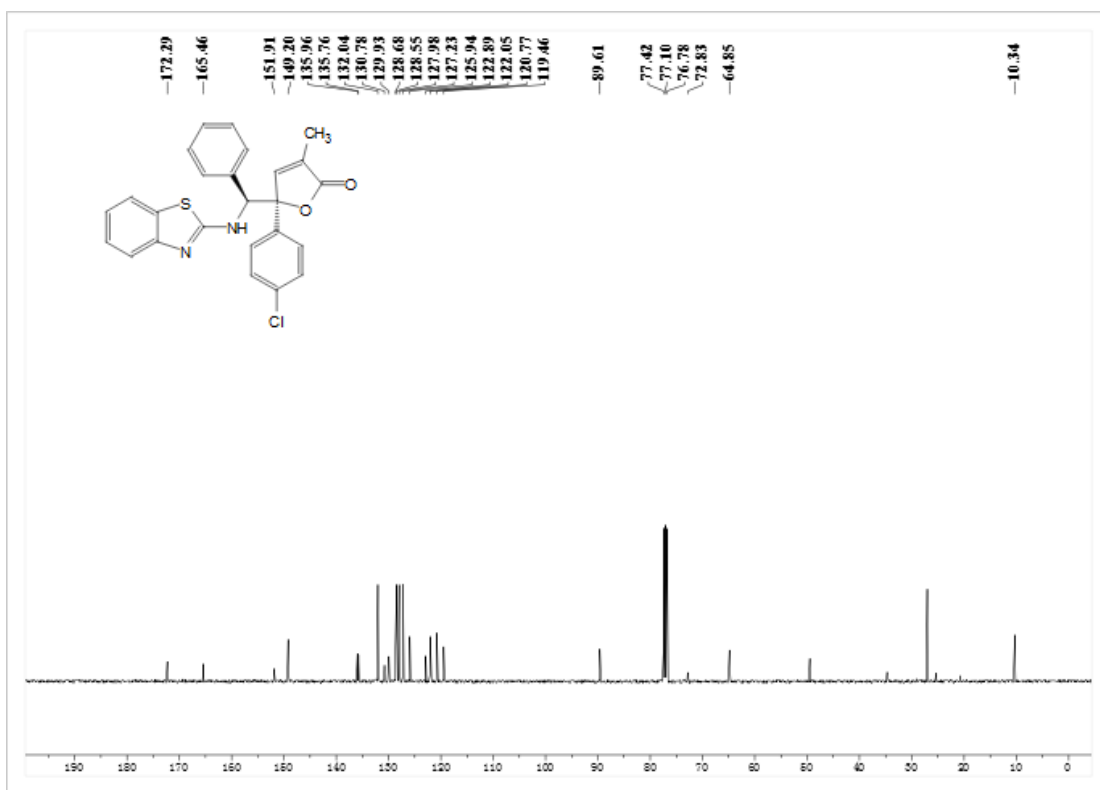



3ad

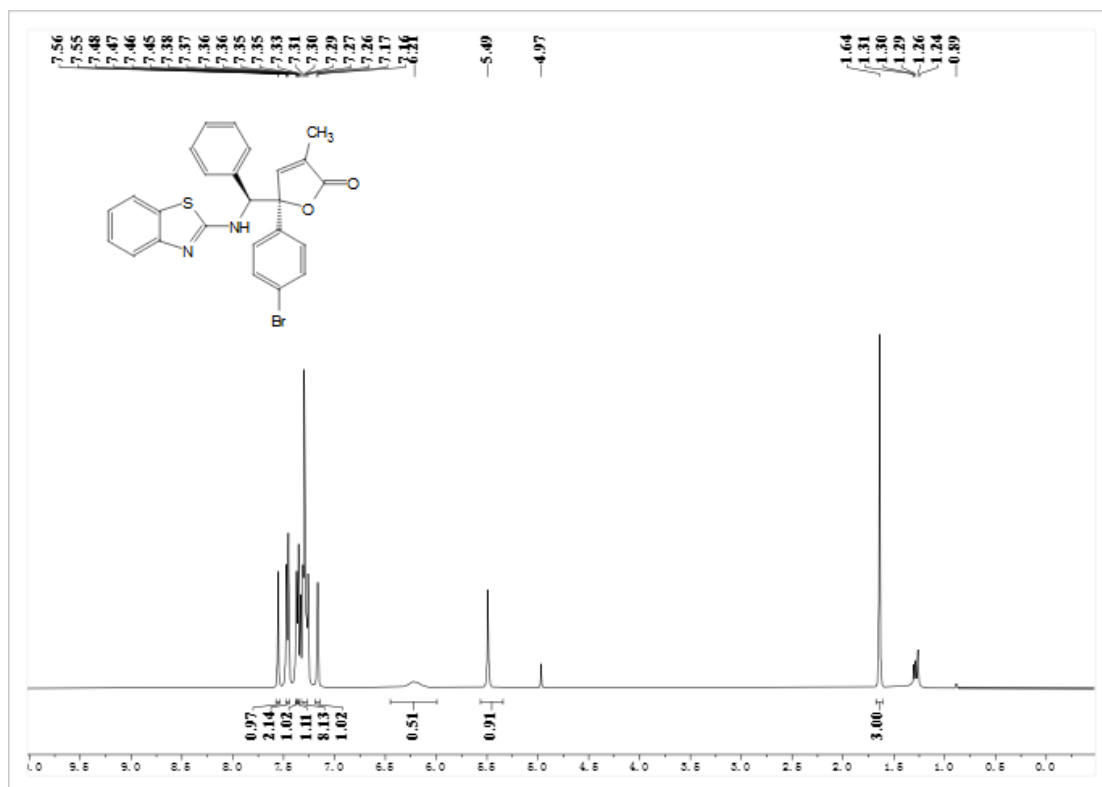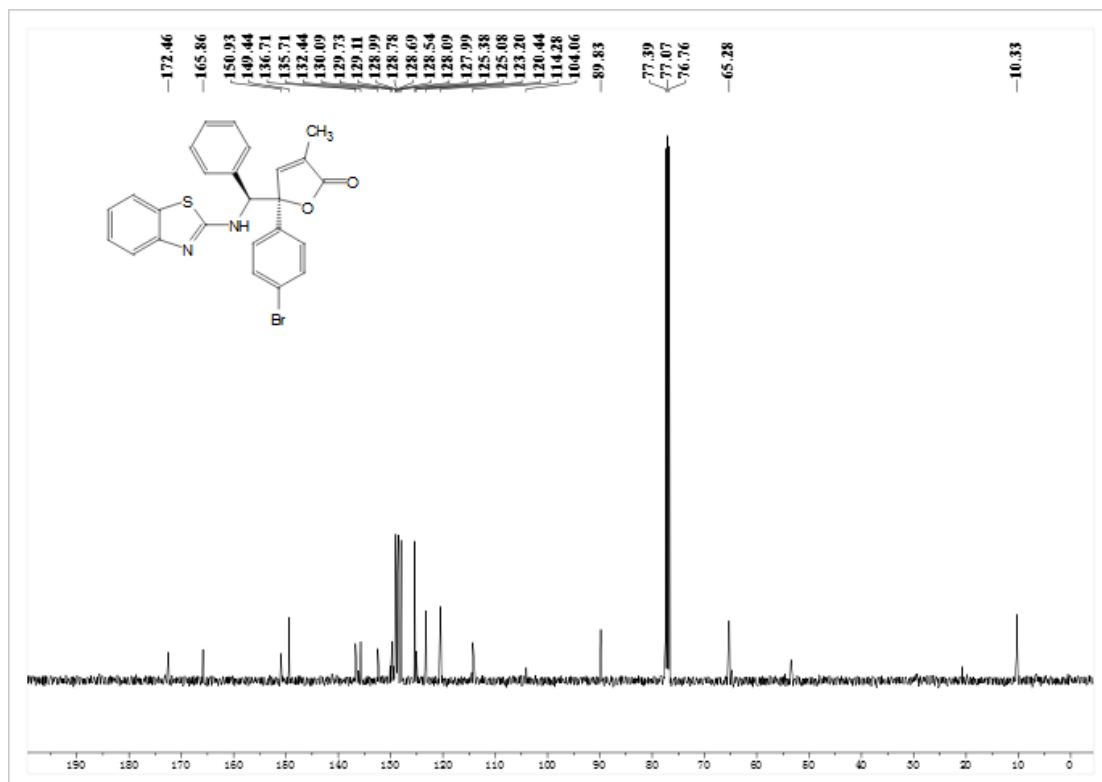

3ae

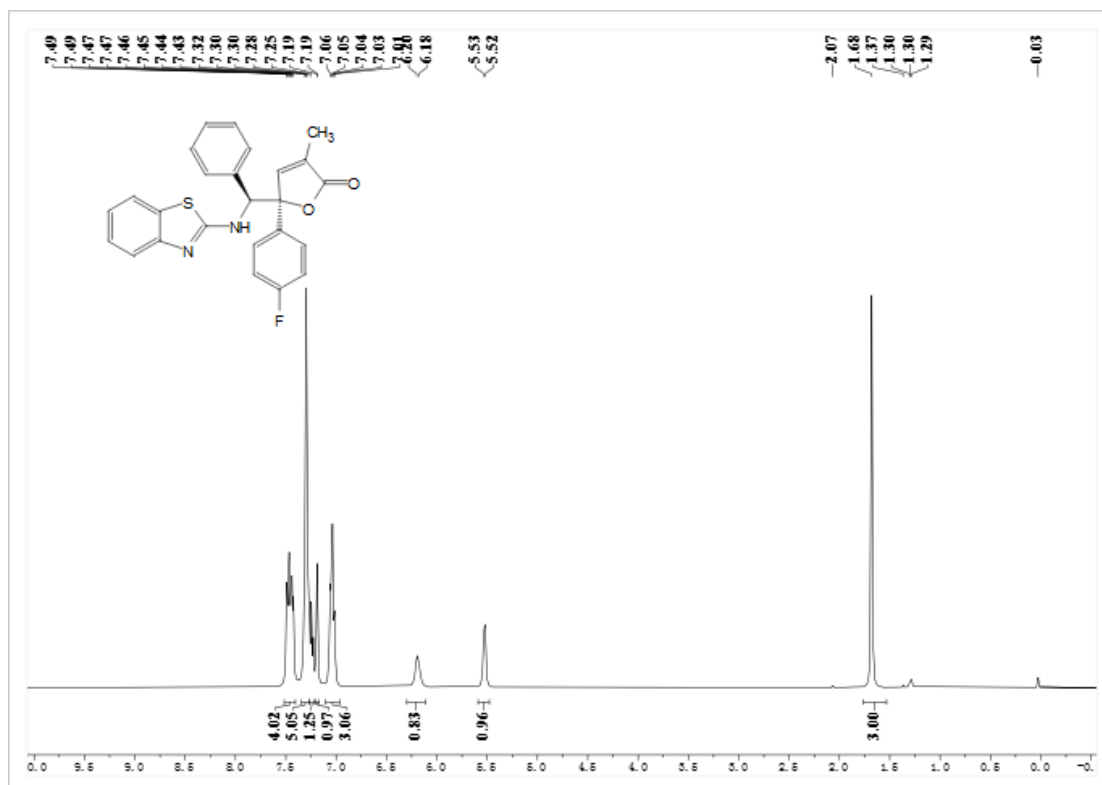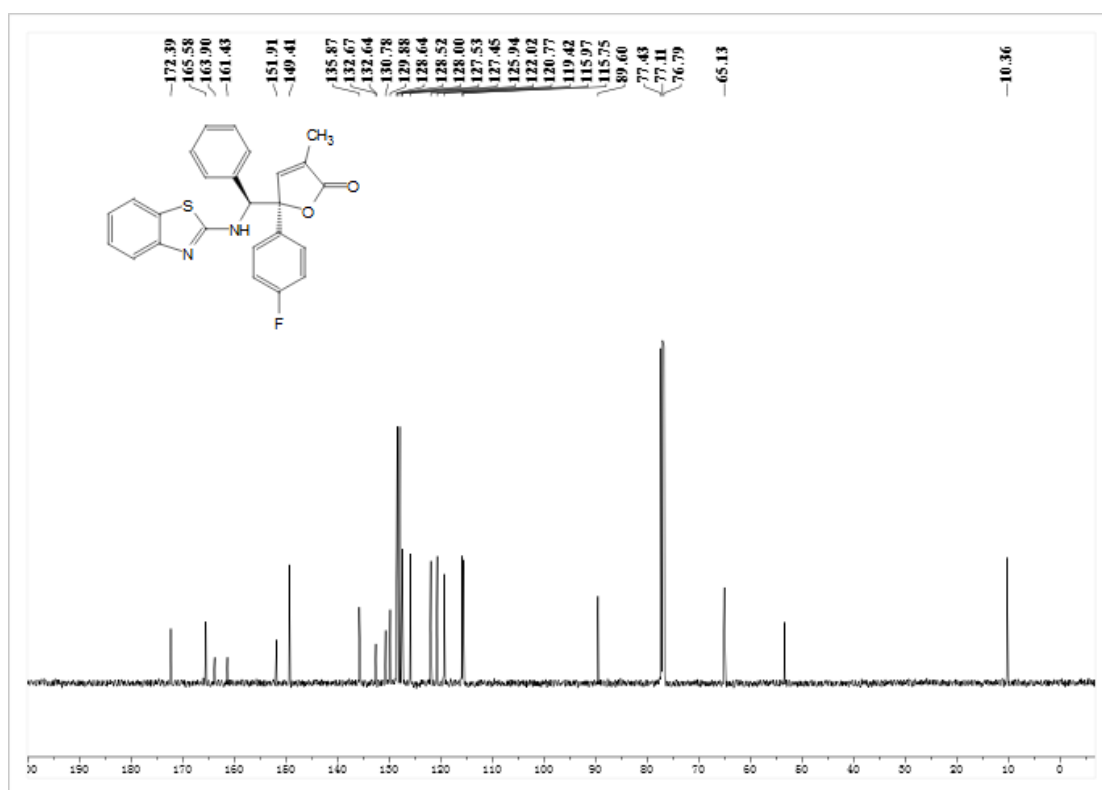

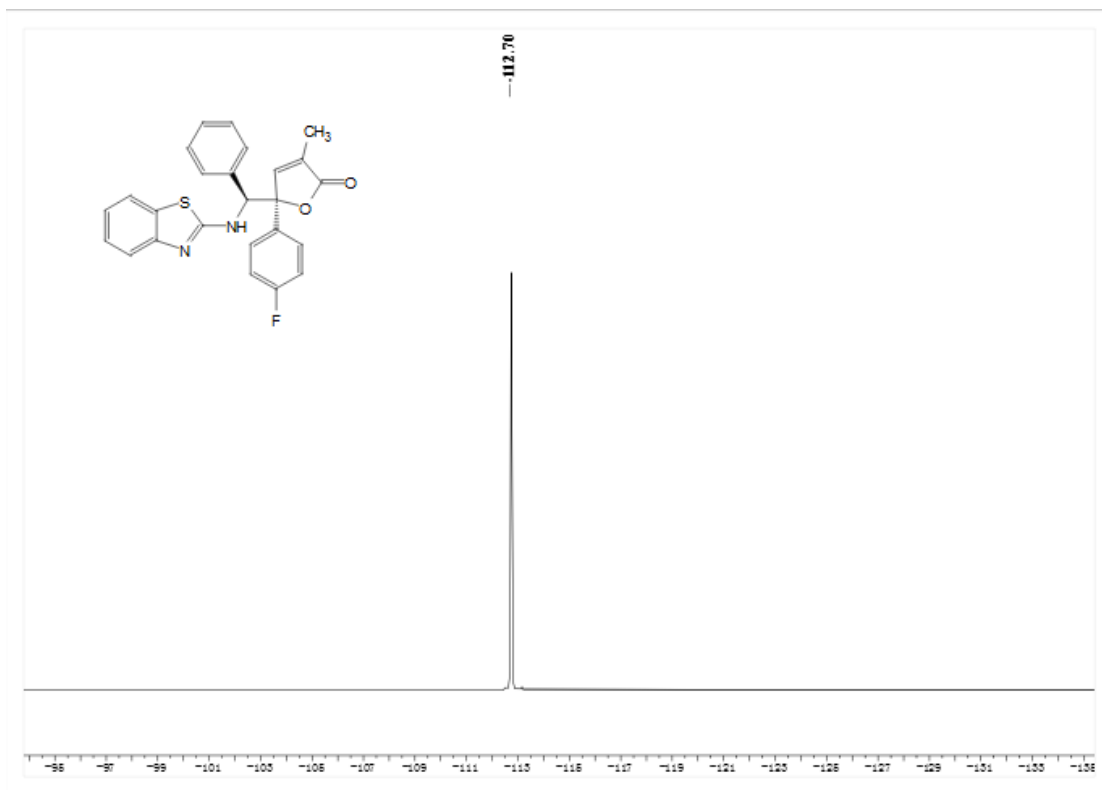

### 3af

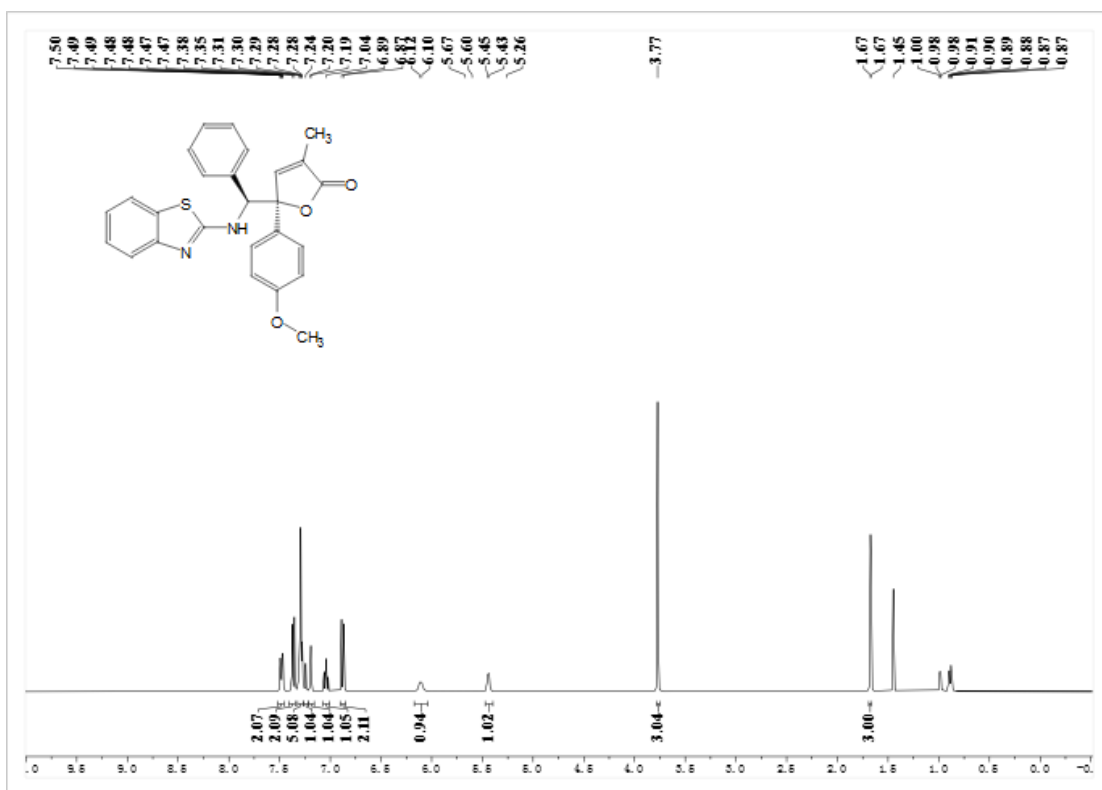

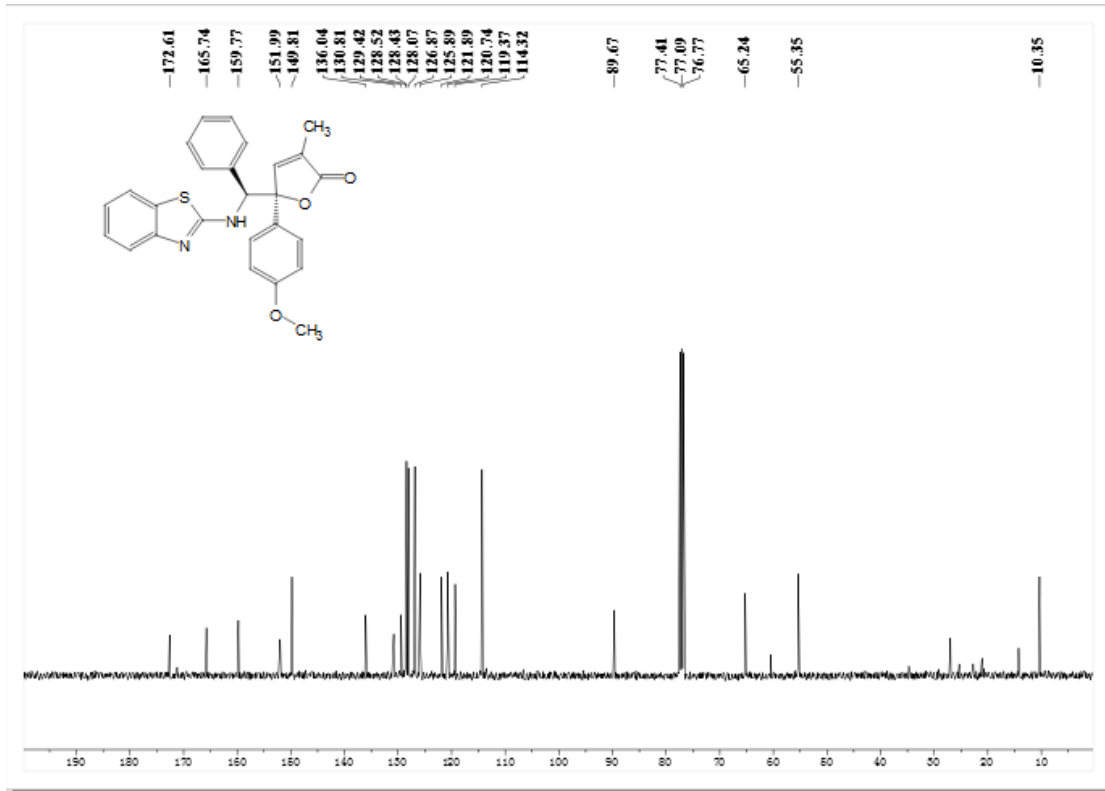

3ag

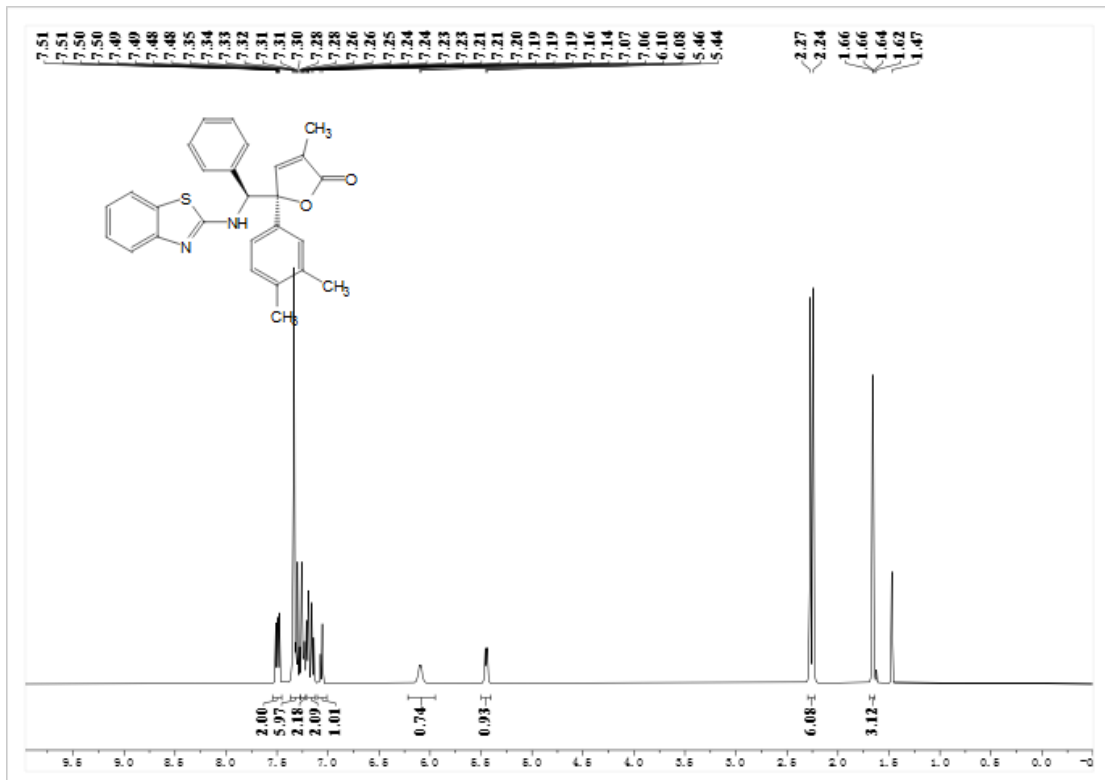

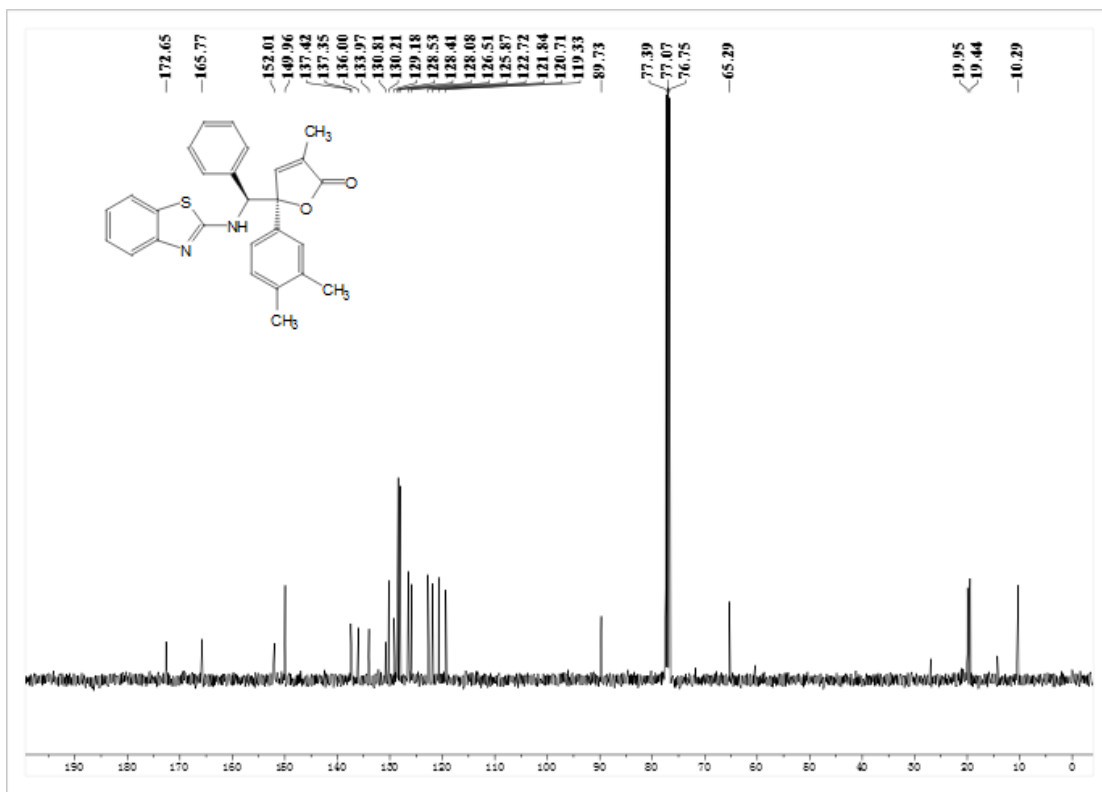

3ah

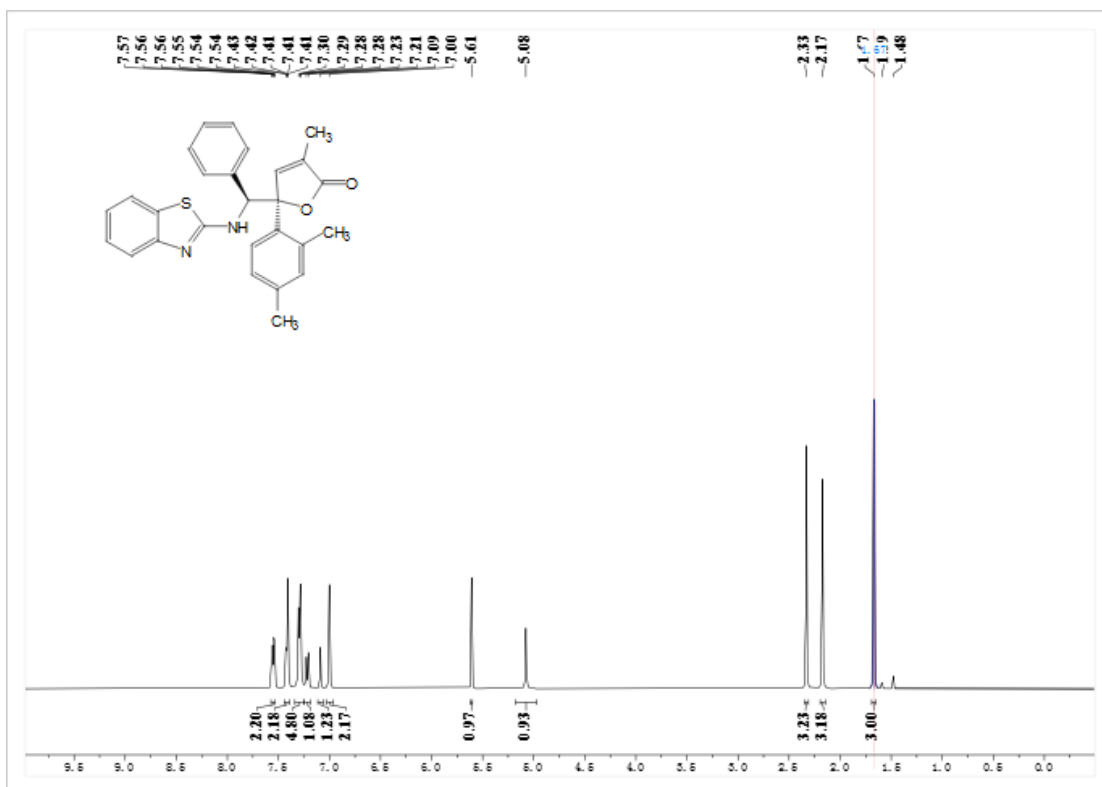

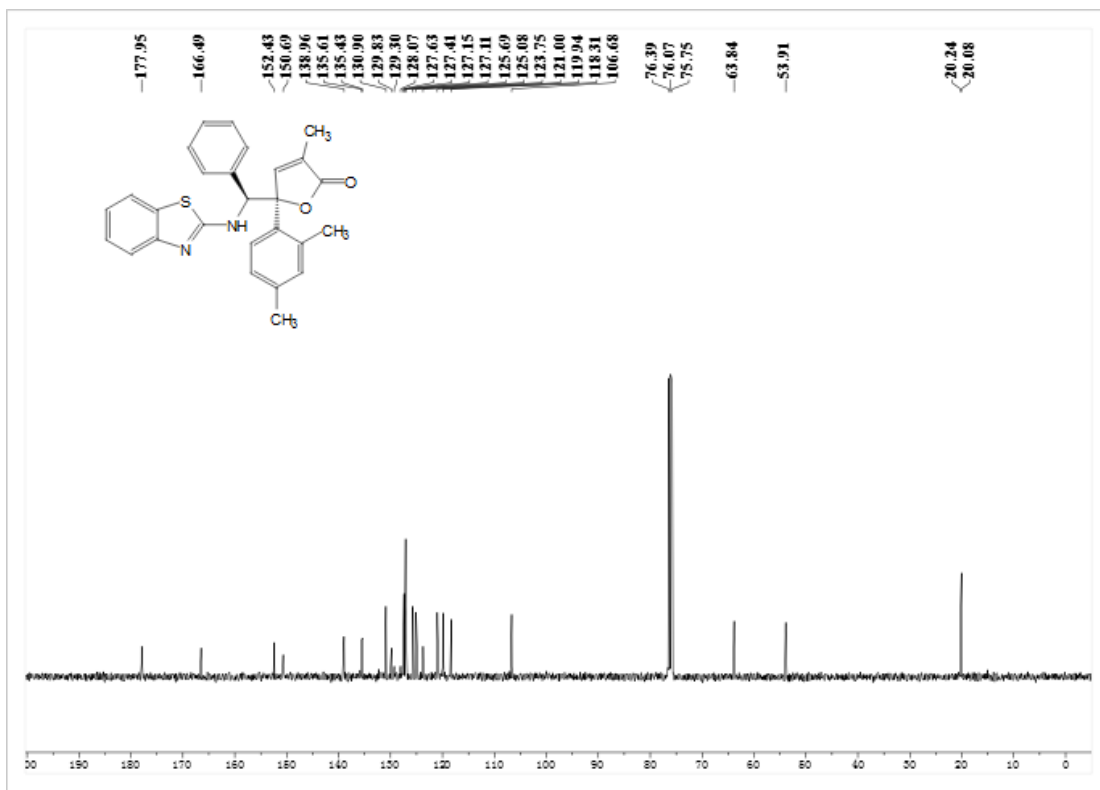

3ai

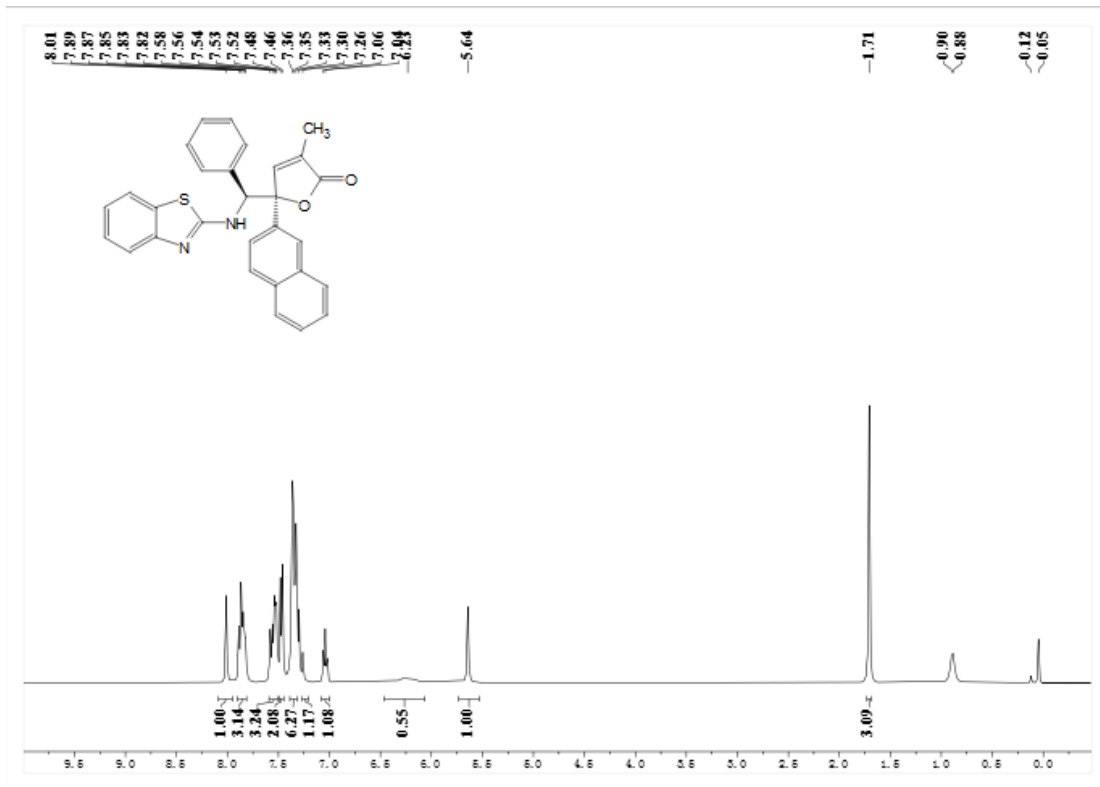

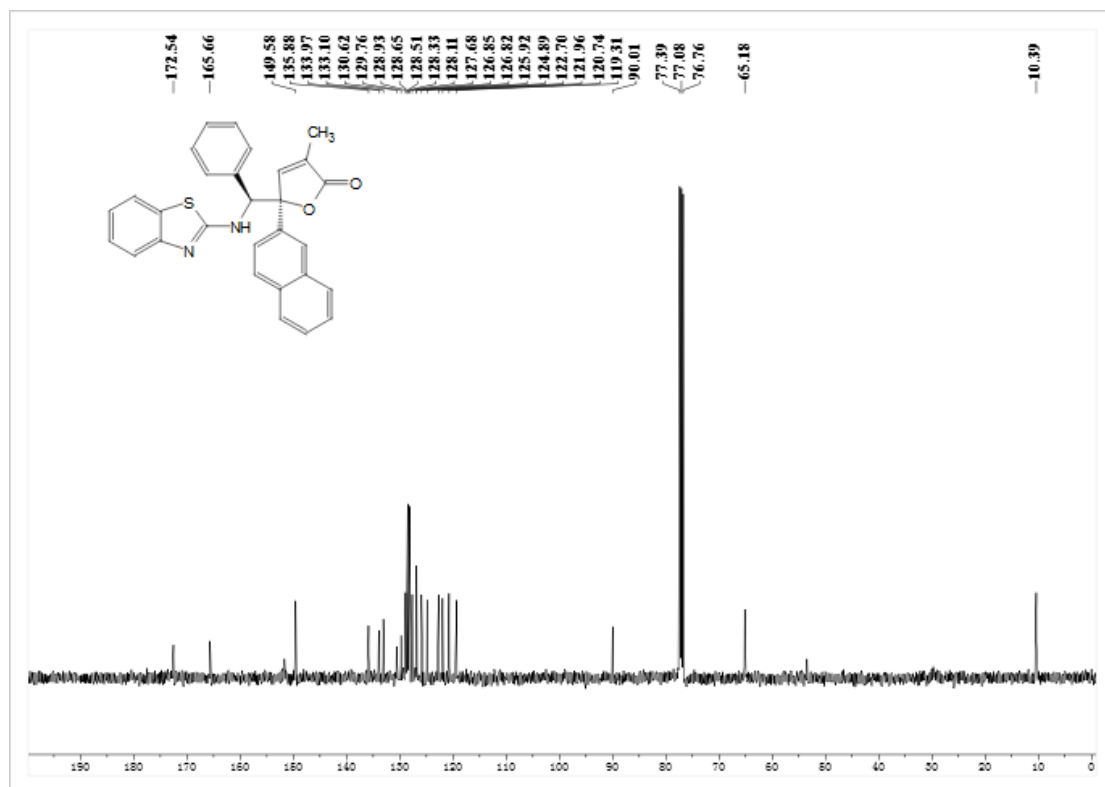

## 7.2 HPLC spectra

3aa

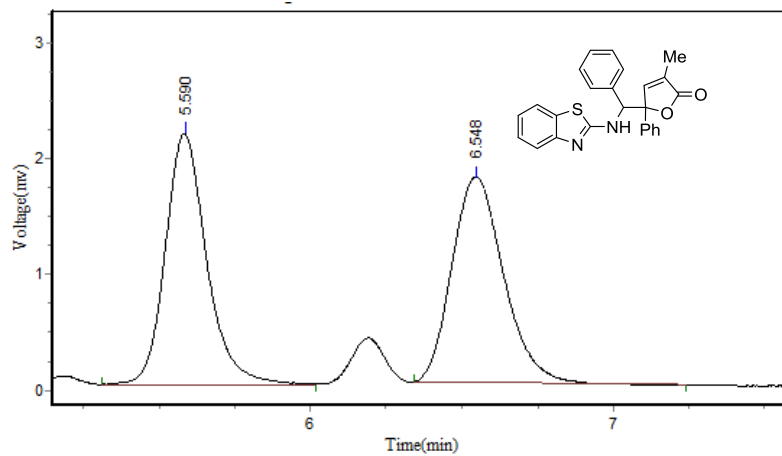

### Results

| Peak No.     | Peak ID | Ret Time | Height   | Area      | Conc.    |
|--------------|---------|----------|----------|-----------|----------|
| 1            |         | 5.590    | 2162.224 | 20382.400 | 48.9888  |
| 2            |         | 6.548    | 1775.713 | 21223.801 | 51.0111  |
| <b>Total</b> |         |          | 3937.937 | 41606.201 | 100.0000 |

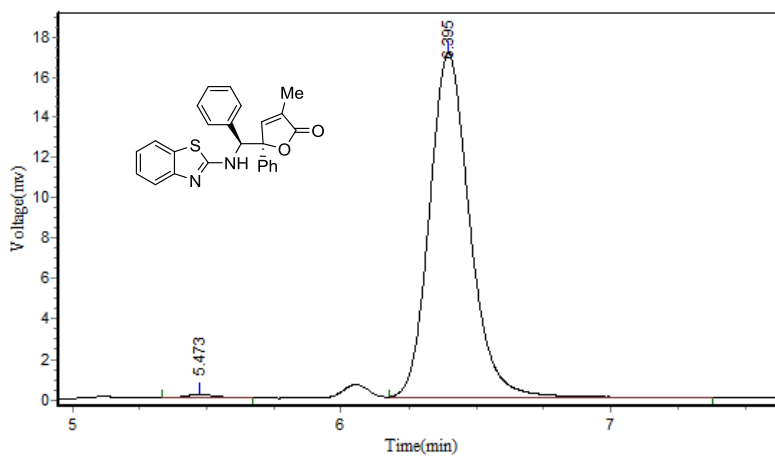

### Results

| Peak No.     | Peak ID | Ret Time | Height    | Area       | Conc.    |
|--------------|---------|----------|-----------|------------|----------|
| 1            |         | 5.473    | 176.476   | 1467.900   | 0.8245   |
| 2            |         | 6.395    | 17068.521 | 176569.094 | 99.1755  |
| <b>Total</b> |         |          | 17244.997 | 178036.994 | 100.0000 |



3ba

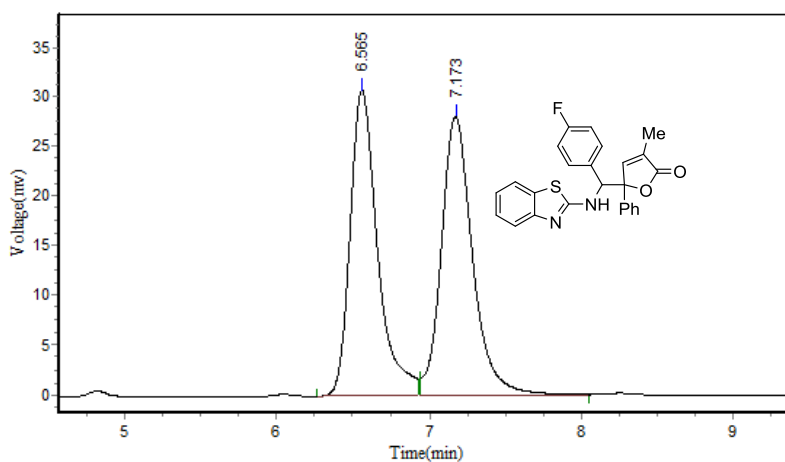

Results

| Peak No.     | Peak ID | Ret Time | Height    | Area       | Conc.    |
|--------------|---------|----------|-----------|------------|----------|
| 1            |         | 6.565    | 30718.047 | 384096.906 | 49.0605  |
| 2            |         | 7.173    | 27994.281 | 398807.406 | 50.9395  |
| <b>Total</b> |         |          | 58712.328 | 782904.313 | 100.0000 |

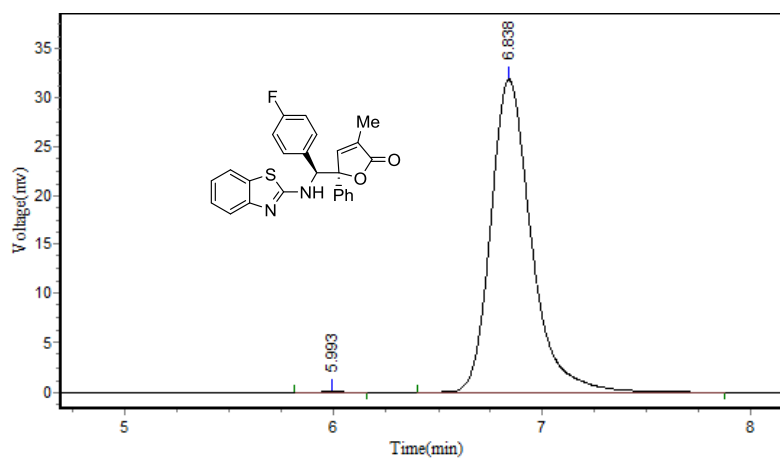

Results

| Peak No.     | Peak ID | Ret Time | Height    | Area       | Conc.    |
|--------------|---------|----------|-----------|------------|----------|
| 1            |         | 5.993    | 107.986   | 957.200    | 0.2218   |
| 2            |         | 6.838    | 31869.359 | 430657.906 | 99.7782  |
| <b>Total</b> |         |          | 31977.345 | 431615.106 | 100.0000 |

3ca

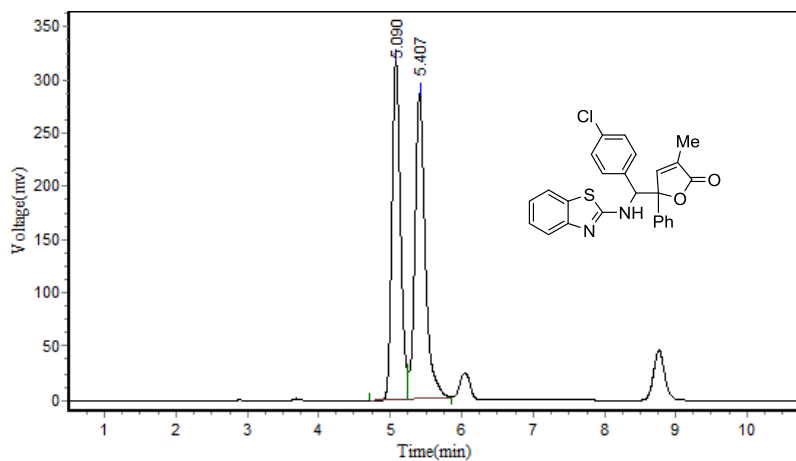

**Results**

| Peak No.     | Peak ID | Ret Time | Height     | Area        | Conc.    |
|--------------|---------|----------|------------|-------------|----------|
| 1            |         | 5.090    | 318101.719 | 2679002.250 | 47.7663  |
| 2            |         | 5.407    | 287463.000 | 2929560.000 | 52.2337  |
| <b>Total</b> |         |          | 605564.719 | 5608562.250 | 100.0000 |

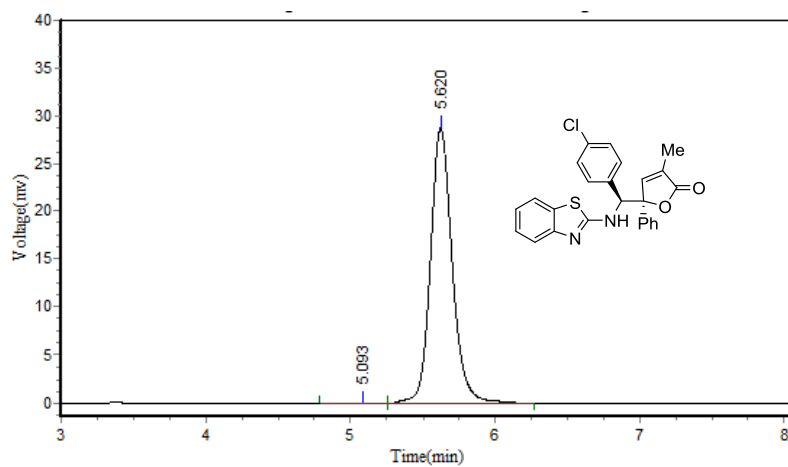

**Results**

| Peak No.     | Peak ID | Ret Time | Height    | Area       | Conc.    |
|--------------|---------|----------|-----------|------------|----------|
| 1            |         | 5.093    | 87.992    | 776.649    | 0.2568   |
| 2            |         | 5.620    | 28744.328 | 301633.625 | 99.7432  |
| <b>Total</b> |         |          | 28832.320 | 302410.274 | 100.0000 |

3da

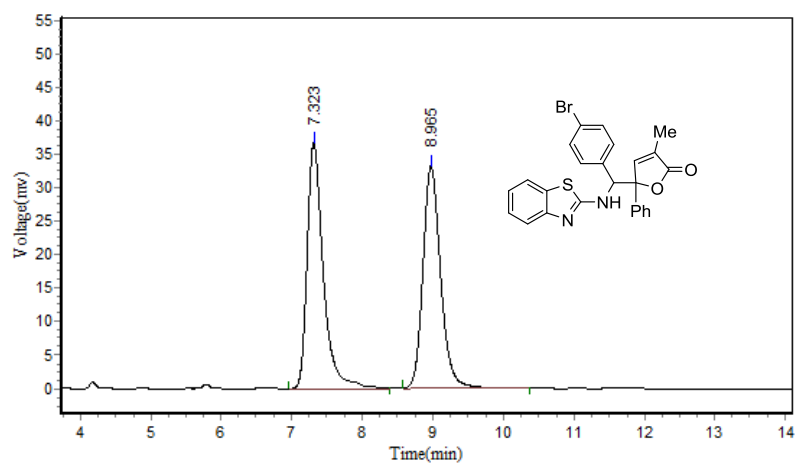

**Results**

| Peak No.     | Peak ID | Ret Time | Height    | Area        | Conc.    |
|--------------|---------|----------|-----------|-------------|----------|
| 1            |         | 7.323    | 36642.730 | 583914.813  | 50.1213  |
| 2            |         | 8.965    | 33078.129 | 581089.250  | 49.8787  |
| <b>Total</b> |         |          | 69720.859 | 1165004.063 | 100.0000 |

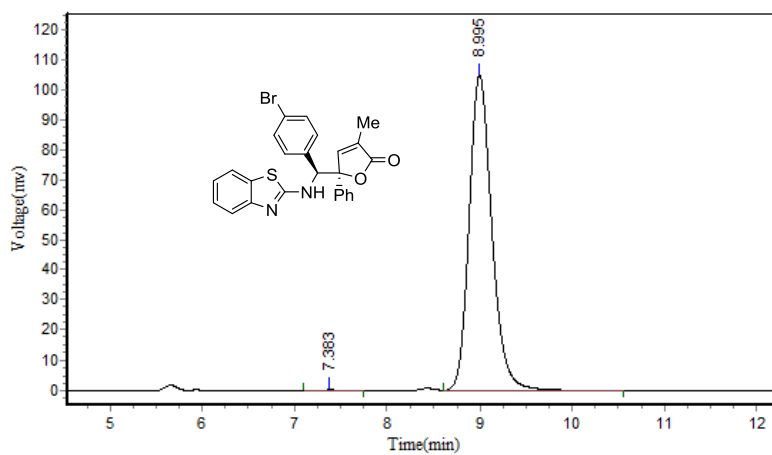

**Results**

| Peak No.     | Peak ID | Ret Time | Height     | Area        | Conc.    |
|--------------|---------|----------|------------|-------------|----------|
| 1            |         | 7.383    | 339.604    | 6430.181    | 0.3567   |
| 2            |         | 8.995    | 104851.289 | 1796489.125 | 99.6433  |
| <b>Total</b> |         |          | 105190.893 | 1802919.306 | 100.0000 |

3ea

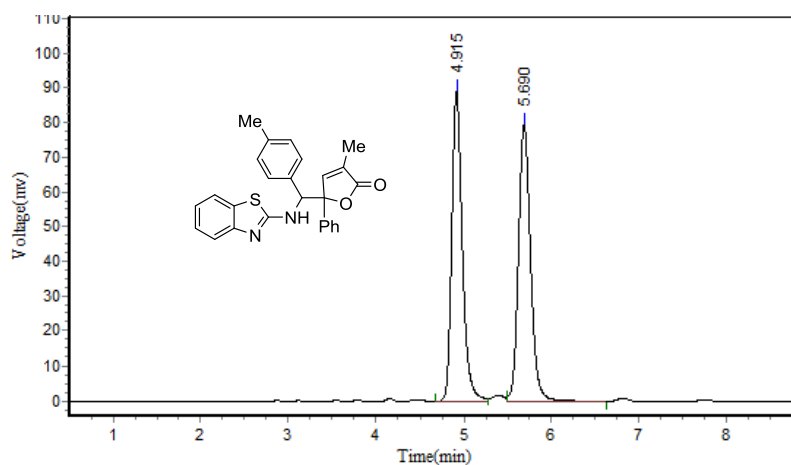

**Results**

| Peak No.     | Peak ID | Ret Time | Height     | Area        | Conc.    |
|--------------|---------|----------|------------|-------------|----------|
| 1            |         | 4.915    | 88748.484  | 752909.375  | 49.5915  |
| 2            |         | 5.690    | 79226.227  | 765314.375  | 50.4085  |
| <b>Total</b> |         |          | 167974.711 | 1518223.750 | 100.0000 |

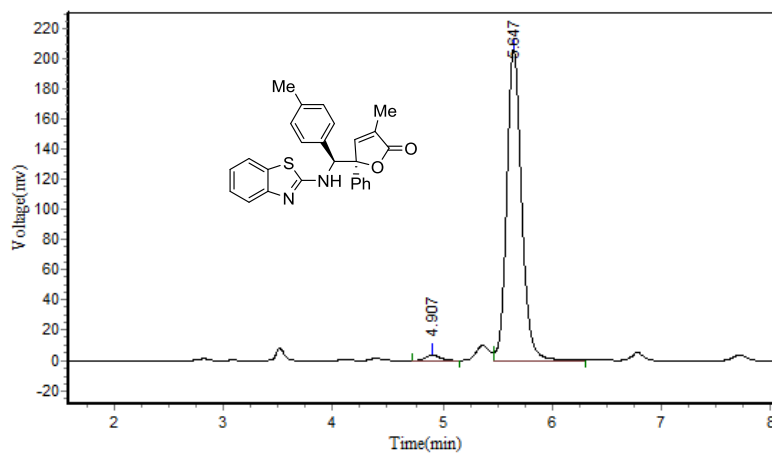

**Results**

| Peak No.     | Peak ID | Ret Time | Height     | Area        | Conc.    |
|--------------|---------|----------|------------|-------------|----------|
| 1            |         | 4.907    | 3562.965   | 31371.973   | 1.5846   |
| 2            |         | 5.647    | 206039.703 | 1948463.375 | 98.4154  |
| <b>Total</b> |         |          | 209602.668 | 1979835.348 | 100.0000 |

3fa

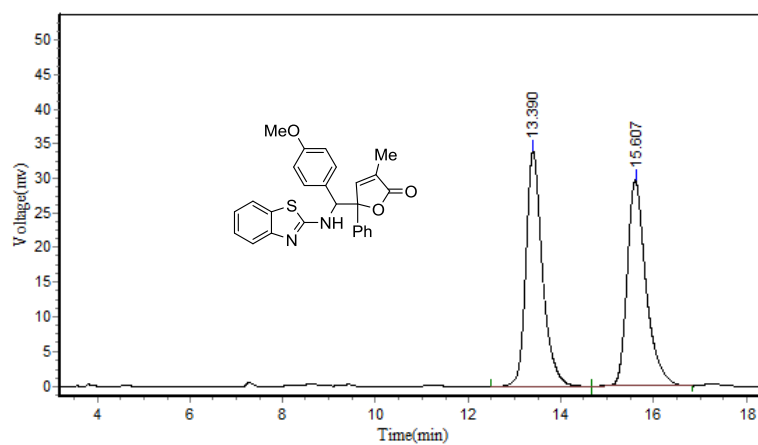

Results

| Peak No.     | Peak ID | Ret Time | Height    | Area        | Conc.    |
|--------------|---------|----------|-----------|-------------|----------|
| 1            |         | 13.390   | 33942.000 | 840903.125  | 50.0400  |
| 2            |         | 15.607   | 29665.115 | 839558.813  | 49.9600  |
| <b>Total</b> |         |          | 63607.115 | 1680461.938 | 100.0000 |

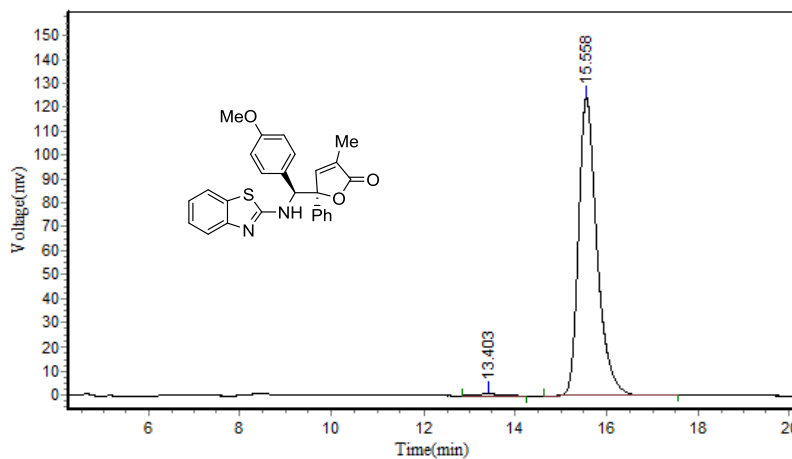

Results

| Peak No.     | Peak ID | Ret Time | Height     | Area        | Conc.    |
|--------------|---------|----------|------------|-------------|----------|
| 1            |         | 13.403   | 861.014    | 21613.199   | 0.6210   |
| 2            |         | 15.558   | 124159.422 | 3458809.250 | 99.3790  |
| <b>Total</b> |         |          | 125020.436 | 3480422.449 | 100.0000 |

3ga

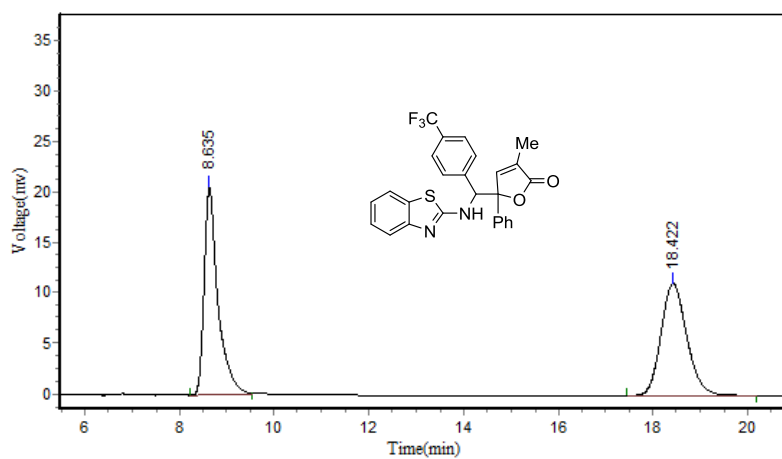

Results

| Peak No.     | Peak ID | Ret Time | Height    | Area       | Conc.    |
|--------------|---------|----------|-----------|------------|----------|
| 1            |         | 8.635    | 20449.176 | 414982.469 | 50.0638  |
| 2            |         | 18.422   | 11012.119 | 413924.875 | 49.9362  |
| <b>Total</b> |         |          | 31461.295 | 828907.344 | 100.0000 |

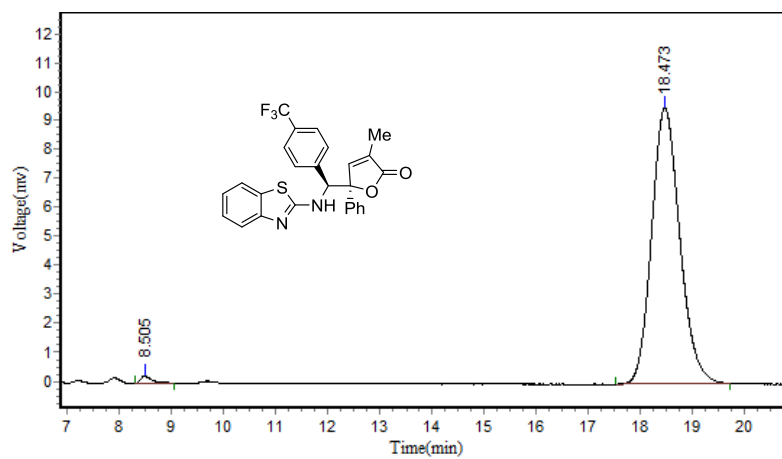

Results

| Peak No.     | Peak ID | Ret Time | Height   | Area       | Conc.    |
|--------------|---------|----------|----------|------------|----------|
| 1            |         | 8.505    | 256.803  | 3740.050   | 1.0393   |
| 2            |         | 18.473   | 9504.573 | 356122.906 | 98.9607  |
| <b>Total</b> |         |          | 9761.376 | 359862.956 | 100.0000 |

3ha

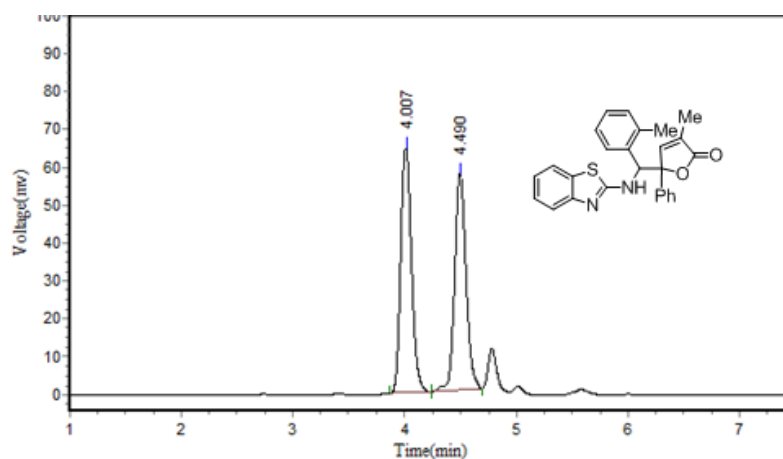

**Results**

| Peak No.     | Peak ID | Ret Time | Height     | Area       | Conc.    |
|--------------|---------|----------|------------|------------|----------|
| 1            |         | 4.007    | 64832.566  | 40670.375  | 48.1166  |
| 2            |         | 4.490    | 58376.563  | 437860.281 | 51.8834  |
| <b>Total</b> |         |          | 123209.129 | 843930.656 | 100.0000 |

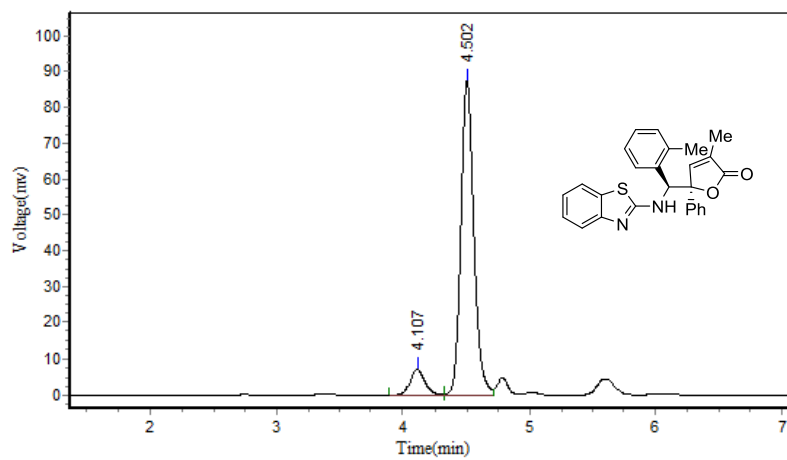

**Results**

| Peak No.     | Peak ID | Ret Time | Height    | Area       | Conc.    |
|--------------|---------|----------|-----------|------------|----------|
| 1            |         | 4.107    | 7167.818  | 55742.180  | 8.1843   |
| 2            |         | 4.502    | 87405.164 | 625346.500 | 91.8157  |
| <b>Total</b> |         |          | 94572.982 | 681088.680 | 100.0000 |

3ia

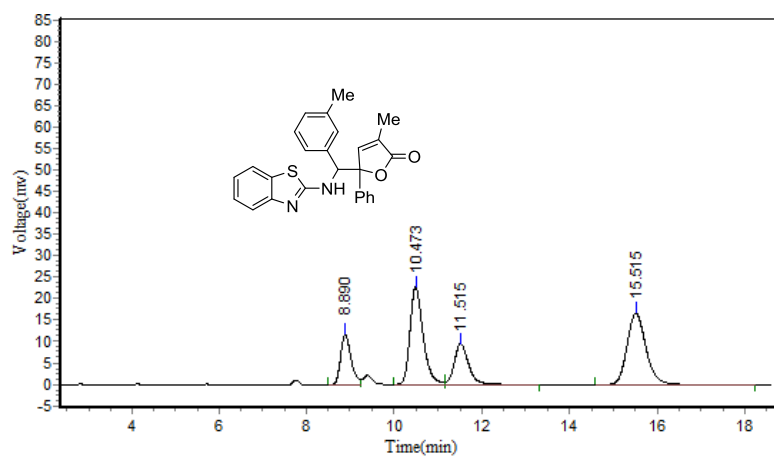

**Results**

| Peak No.     | Peak ID | Ret Time | Height    | Area        | Conc.    |
|--------------|---------|----------|-----------|-------------|----------|
| 1            |         | 8.890    | 11591.886 | 192064.828  | 13.8288  |
| 2            |         | 10.473   | 22645.340 | 477109.563  | 34.3521  |
| 3            |         | 11.515   | 9485.716  | 220552.953  | 15.8799  |
| 4            |         | 15.515   | 16576.199 | 499152.500  | 35.9392  |
| <b>Total</b> |         |          | 60299.141 | 1388879.844 | 100.0000 |

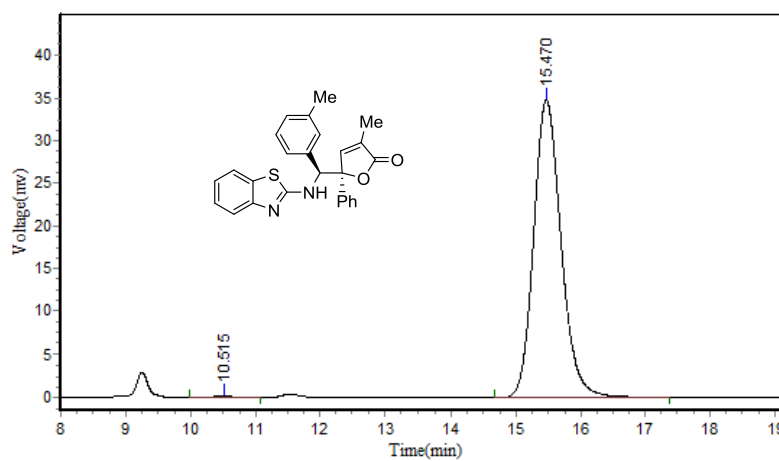

**Results**

| Peak No.     | Peak ID | Ret Time | Height    | Area        | Conc.    |
|--------------|---------|----------|-----------|-------------|----------|
| 1            |         | 10.515   | 209.389   | 5215.250    | 0.5100   |
| 2            |         | 15.470   | 34775.742 | 1017320.625 | 99.4900  |
| <b>Total</b> |         |          | 34985.131 | 1022535.875 | 100.0000 |



3ja

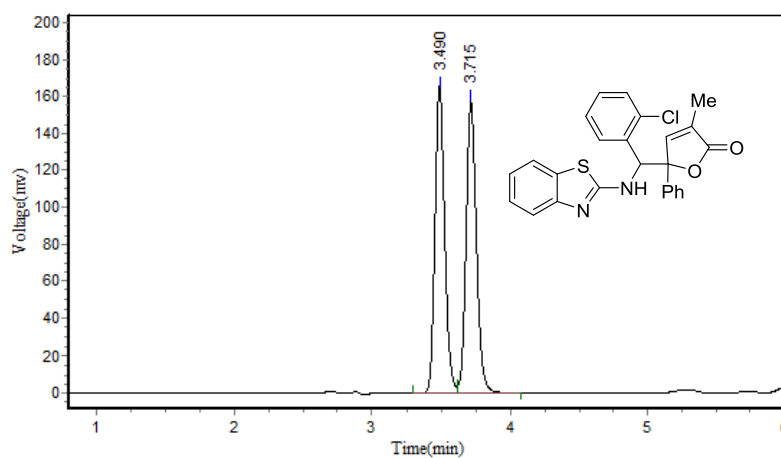

Results

| Peak No.     | Peak ID | Ret Time | Height     | Area        | Conc.    |
|--------------|---------|----------|------------|-------------|----------|
| 1            |         | 3.490    | 164819.406 | 812789.625  | 49.6504  |
| 2            |         | 3.715    | 155524.875 | 824234.438  | 50.3496  |
| <b>Total</b> |         |          | 320344.281 | 1637024.063 | 100.0000 |

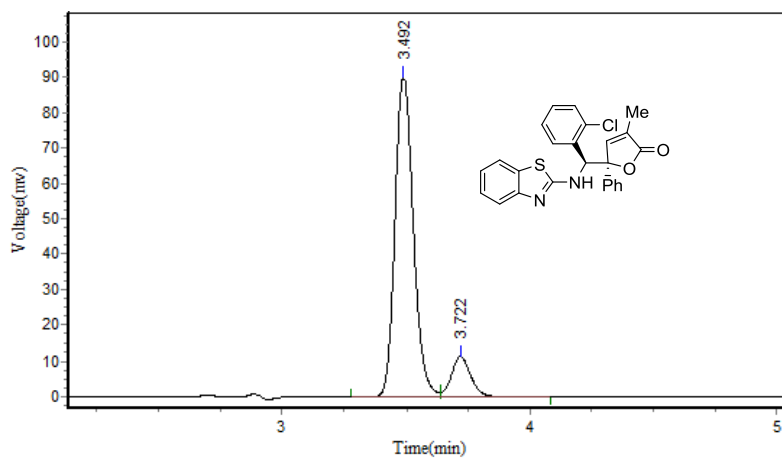

Results

| Peak No.     | Peak ID | Ret Time | Height     | Area       | Conc.    |
|--------------|---------|----------|------------|------------|----------|
| 1            |         | 3.492    | 89533.742  | 442322.469 | 87.7281  |
| 2            |         | 3.722    | 11335.073  | 61874.711  | 12.2719  |
| <b>Total</b> |         |          | 100868.815 | 504197.180 | 100.0000 |

3ka

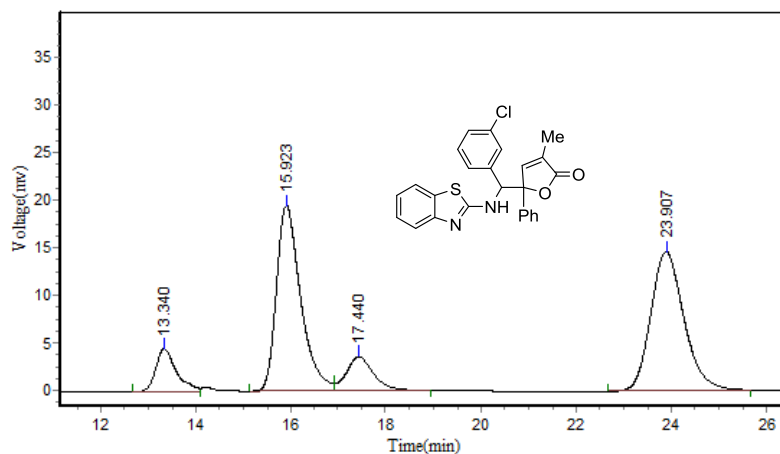

Results

| Peak No.     | Peak ID | Ret Time | Height    | Area        | Conc.    |
|--------------|---------|----------|-----------|-------------|----------|
| 1            |         | 13.340   | 4372.527  | 132262.484  | 7.8315   |
| 2            |         | 15.923   | 19471.693 | 691424.688  | 40.9403  |
| 3            |         | 17.440   | 3602.618  | 148966.406  | 8.8205   |
| 4            |         | 23.907   | 14598.172 | 716205.813  | 42.4077  |
| <b>Total</b> |         |          | 42045.010 | 1688859.391 | 100.0000 |

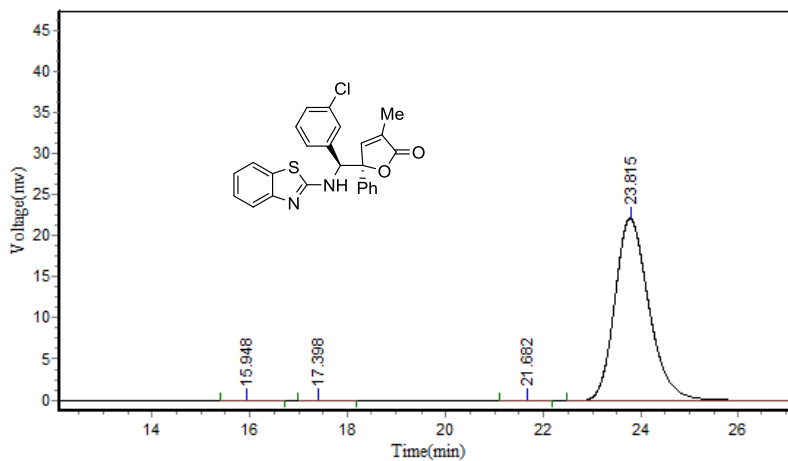

Results

| Peak No.     | Peak ID | Ret Time | Height    | Area        | Conc.    |
|--------------|---------|----------|-----------|-------------|----------|
| 1            |         | 15.948   | 97.478    | 3320.800    | 0.3039   |
| 2            |         | 17.398   | 25.667    | 906.800     | 0.0830   |
| 3            |         | 21.682   | 9.000     | 279.300     | 0.0256   |
| 4            |         | 23.815   | 22127.338 | 1088205.875 | 99.5876  |
| <b>Total</b> |         |          | 22259.482 | 1092712.775 | 100.0000 |

3la

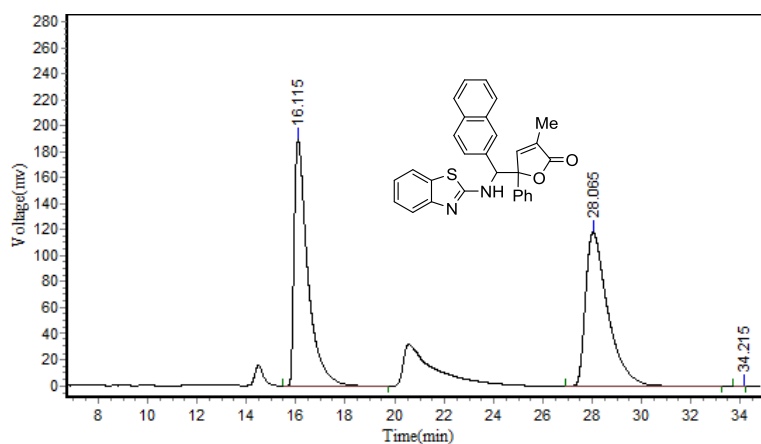

Results

| Peak No.     | Peak ID | Ret Time | Height     | Area         | Conc.    |
|--------------|---------|----------|------------|--------------|----------|
| 1            |         | 16.115   | 188732.109 | 7214528.500  | 49.4188  |
| 2            |         | 28.065   | 118072.328 | 7384203.000  | 50.5811  |
| 3            |         | 34.215   | 1.200      | 19.000       | 0.0001   |
| <b>Total</b> |         |          | 306805.638 | 14598750.500 | 100.0000 |

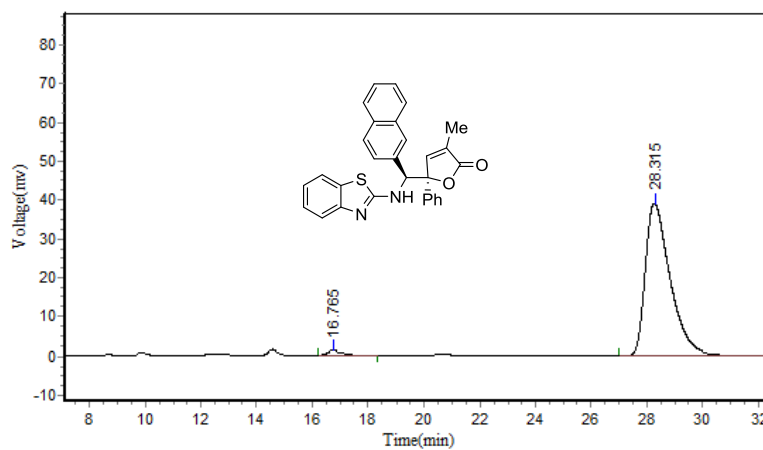

Results

| Peak No.     | Peak ID | Ret Time | Height    | Area        | Conc.    |
|--------------|---------|----------|-----------|-------------|----------|
| 1            |         | 16.765   | 1041.391  | 41091.699   | 1.6737   |
| 2            |         | 28.315   | 39098.180 | 2414083.500 | 98.3263  |
| <b>Total</b> |         |          | 40139.571 | 2455175.199 | 100.0000 |

3ma

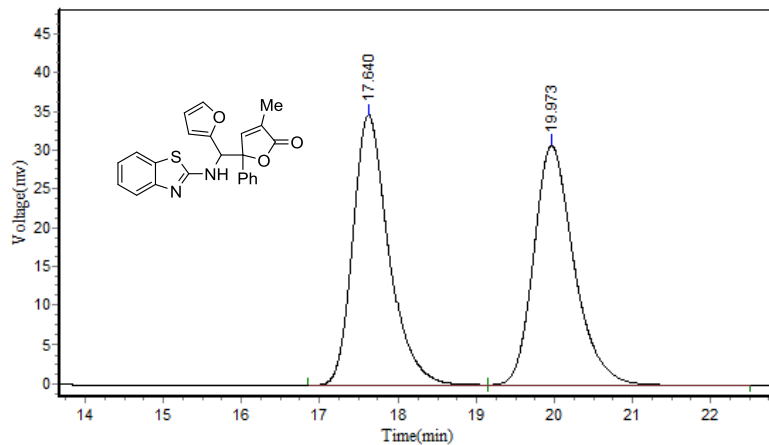

**Results**

| Peak No.     | Peak ID | Ret Time | Height    | Area        | Conc.    |
|--------------|---------|----------|-----------|-------------|----------|
| 1            |         | 17.640   | 34744.059 | 1096935.750 | 50.0770  |
| 2            |         | 19.973   | 30662.920 | 1093560.500 | 49.9230  |
| <b>Total</b> |         |          | 65406.979 | 2190496.250 | 100.0000 |

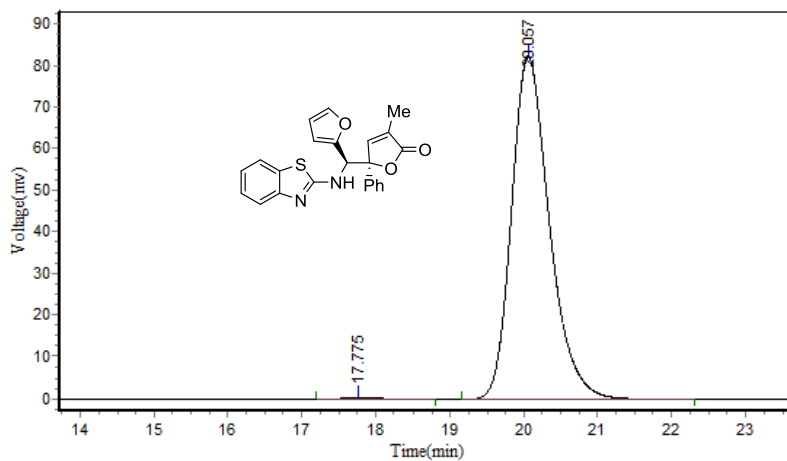

**Results**

| Peak No.     | Peak ID | Ret Time | Height    | Area        | Conc.    |
|--------------|---------|----------|-----------|-------------|----------|
| 1            |         | 17.775   | 387.207   | 13505.450   | 0.4590   |
| 2            |         | 20.057   | 82293.594 | 2928905.250 | 99.5410  |
| <b>Total</b> |         |          | 82680.801 | 2942410.700 | 100.0000 |

3na

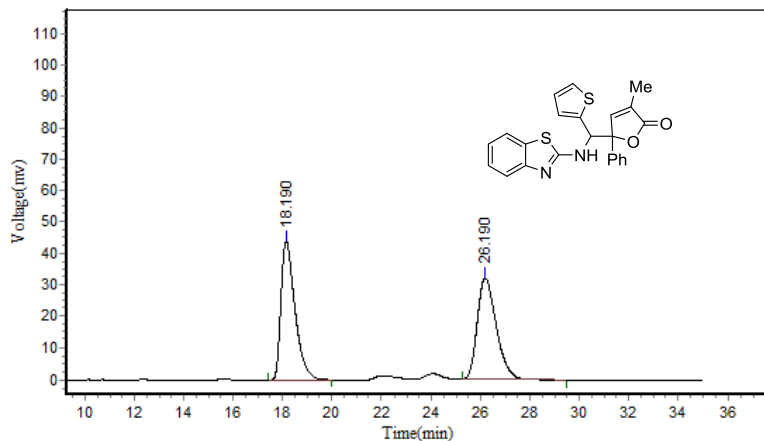

**Results**

| Peak No.     | Peak ID | Ret Time | Height    | Area        | Conc.    |
|--------------|---------|----------|-----------|-------------|----------|
| 1            |         | 18.190   | 44005.809 | 1718210.750 | 49.9124  |
| 2            |         | 26.190   | 32144.914 | 1724242.000 | 50.0876  |
| <b>Total</b> |         |          | 76150.723 | 3442452.750 | 100.0000 |

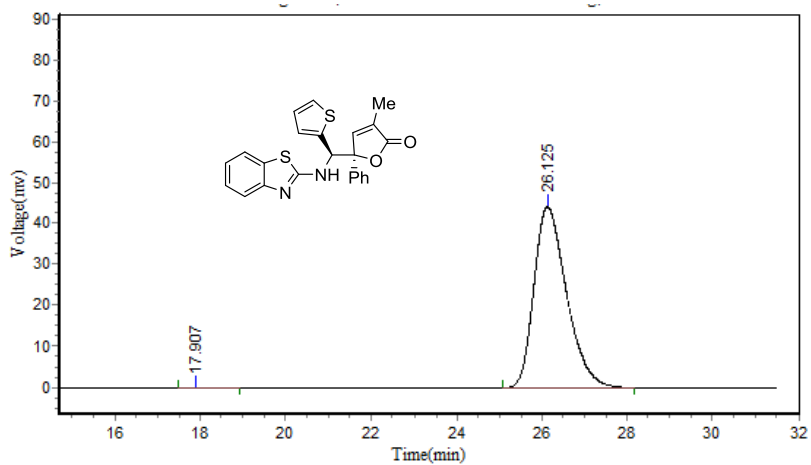

**Results**

| Peak No.     | Peak ID | Ret Time | Height    | Area        | Conc.    |
|--------------|---------|----------|-----------|-------------|----------|
| 1            |         | 17.907   | 15.321    | 740.580     | 0.0318   |
| 2            |         | 26.125   | 43928.492 | 2327279.000 | 99.9682  |
| <b>Total</b> |         |          | 43943.813 | 2328019.580 | 100.0000 |

30a

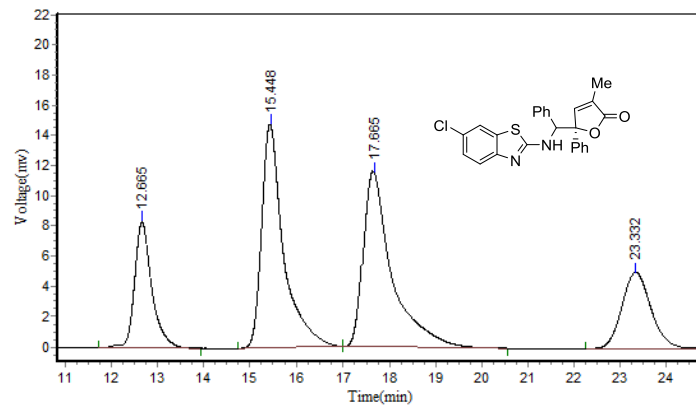

**Results**

| Peak No.     | Peak ID | Ret Time | Height    | Area        | Conc.    |
|--------------|---------|----------|-----------|-------------|----------|
| 1            |         | 12.665   | 8298.426  | 216491.953  | 15.3854  |
| 2            |         | 15.448   | 14742.941 | 482512.688  | 34.2907  |
| 3            |         | 17.665   | 11579.873 | 490469.813  | 34.8562  |
| 4            |         | 23.332   | 4990.010  | 217648.906  | 15.4676  |
| <b>Total</b> |         |          | 39611.250 | 1407123.359 | 100.0000 |

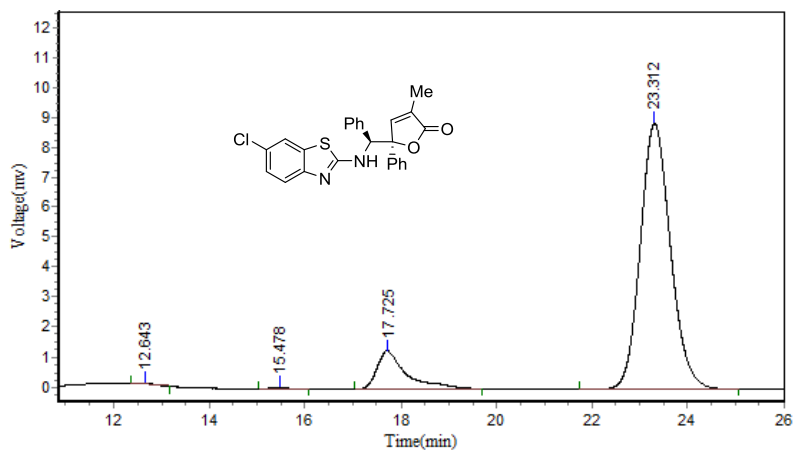

**Results**

| Peak No.     | Peak ID | Ret Time | Height    | Area       | Conc.    |
|--------------|---------|----------|-----------|------------|----------|
| 1            |         | 12.643   | 56.290    | 1231.400   | 0.2767   |
| 2            |         | 15.478   | 35.632    | 836.800    | 0.1880   |
| 3            |         | 17.725   | 1252.971  | 53366.398  | 11.9921  |
| 4            |         | 23.312   | 8873.702  | 389578.938 | 87.5432  |
| <b>Total</b> |         |          | 10218.596 | 445013.536 | 100.0000 |

3pa

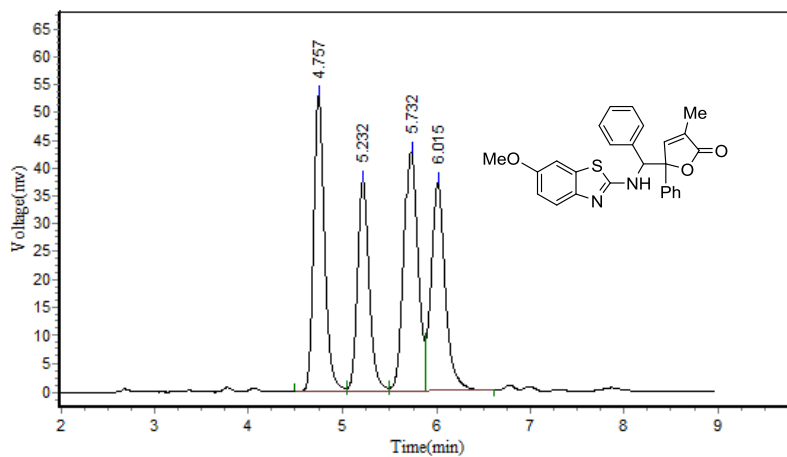

**Results**

| Peak No.     | Peak ID | Ret Time | Height     | Area        | Conc.    |
|--------------|---------|----------|------------|-------------|----------|
| 1            |         | 4.757    | 52852.281  | 426369.219  | 26.9697  |
| 2            |         | 5.232    | 37619.750  | 329139.688  | 20.8195  |
| 3            |         | 5.732    | 42879.402  | 431988.313  | 27.3252  |
| 4            |         | 6.015    | 37246.137  | 393421.063  | 24.8856  |
| <b>Total</b> |         |          | 170597.570 | 1580918.281 | 100.0000 |

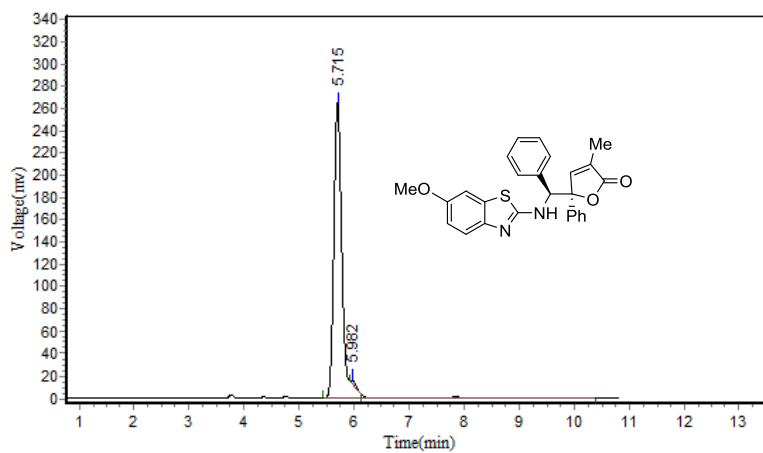

**Results**

| Peak No.     | Peak ID | Ret Time | Height     | Area        | Conc.    |
|--------------|---------|----------|------------|-------------|----------|
| 1            |         | 5.715    | 264031.438 | 2717820.500 | 99.1051  |
| 2            |         | 5.982    | 3831.750   | 24539.902   | 0.8948   |
| <b>Total</b> |         |          | 267863.188 | 2742360.402 | 100.0000 |

3qa

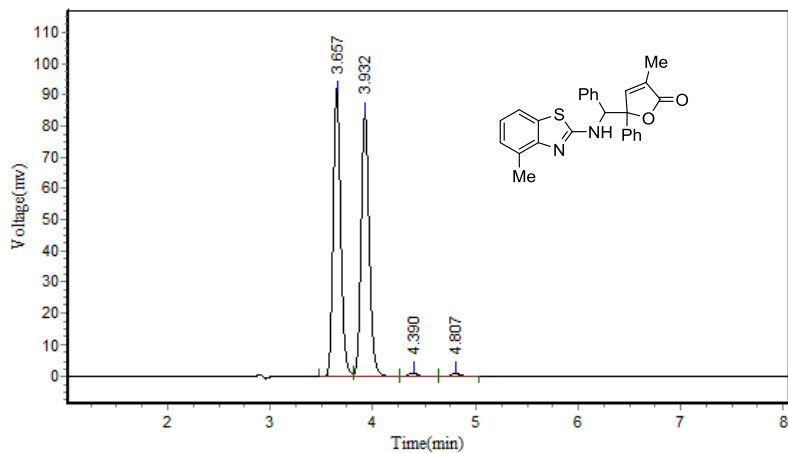

Results

| Peak No.     | Peak ID | Ret Time | Height     | Area       | Conc.    |
|--------------|---------|----------|------------|------------|----------|
| 1            |         | 3.657    | 91448.500  | 468568.281 | 49.1732  |
| 2            |         | 3.932    | 84129.984  | 468263.844 | 49.1412  |
| 3            |         | 4.390    | 1295.794   | 8787.645   | 0.9222   |
| 4            |         | 4.807    | 1036.982   | 7274.027   | 0.7634   |
| <b>Total</b> |         |          | 177911.260 | 952893.797 | 100.0000 |

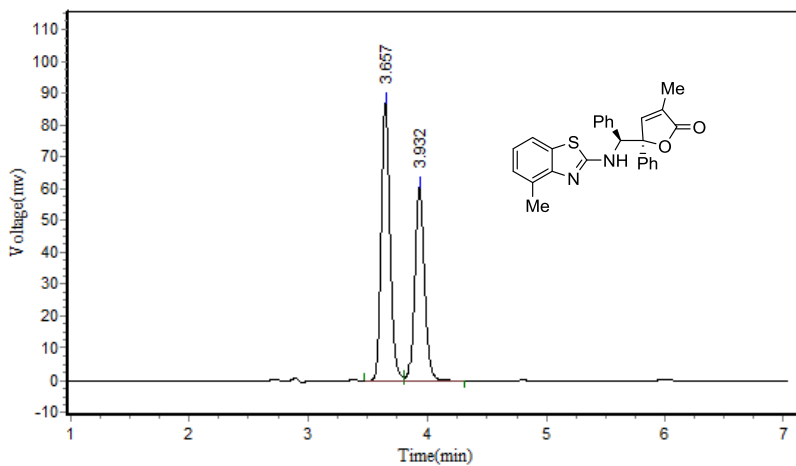

Results

| Peak No.     | Peak ID | Ret Time | Height     | Area       | Conc.    |
|--------------|---------|----------|------------|------------|----------|
| 1            |         | 3.657    | 87119.328  | 448382.531 | 56.9726  |
| 2            |         | 3.932    | 60104.520  | 338631.563 | 43.0274  |
| <b>Total</b> |         |          | 147223.848 | 787014.094 | 100.0000 |



3qa



Results

| Peak No.     | Peak ID | Ret Time | Height     | Area       | Conc.    |
|--------------|---------|----------|------------|------------|----------|
| 1            |         | 3.657    | 91448.500  | 468568.281 | 49.1732  |
| 2            |         | 3.932    | 84129.984  | 468263.844 | 49.1412  |
| 3            |         | 4.390    | 1295.794   | 8787.645   | 0.9222   |
| 4            |         | 4.807    | 1036.982   | 7274.027   | 0.7634   |
| <b>Total</b> |         |          | 177911.260 | 952893.797 | 100.0000 |

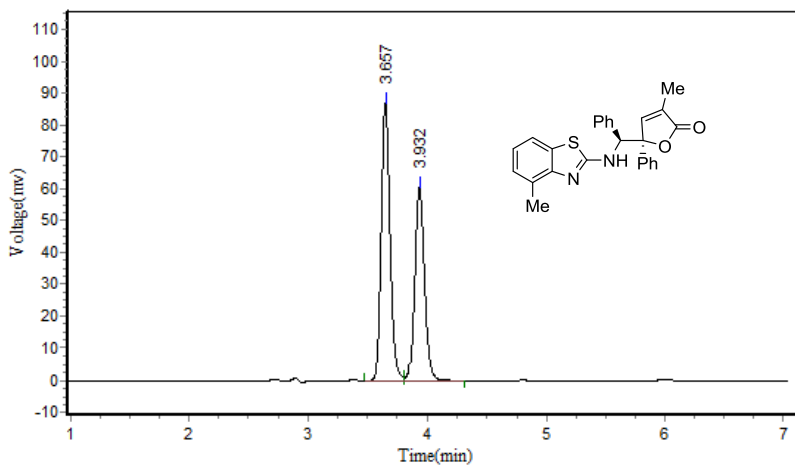

Results

| Peak No.     | Peak ID | Ret Time | Height     | Area       | Conc.    |
|--------------|---------|----------|------------|------------|----------|
| 1            |         | 3.657    | 87119.328  | 448382.531 | 56.9726  |
| 2            |         | 3.932    | 60104.520  | 338631.563 | 43.0274  |
| <b>Total</b> |         |          | 147223.848 | 787014.094 | 100.0000 |

3ab

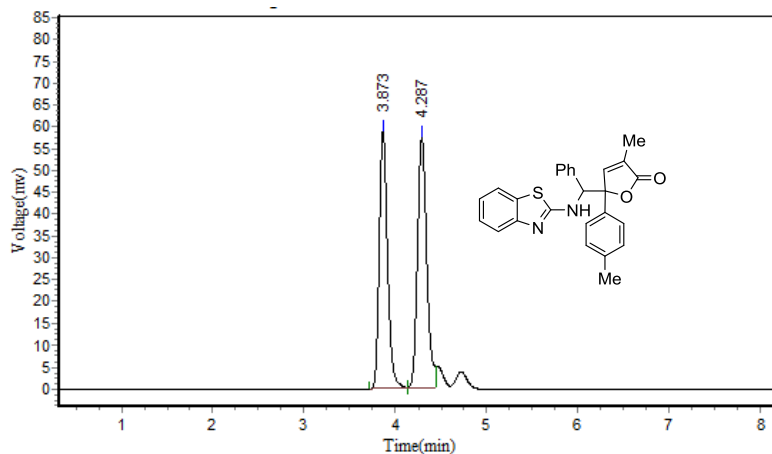

**Results**

| Peak No.     | Peak ID | Ret Time | Height     | Area       | Conc.    |
|--------------|---------|----------|------------|------------|----------|
| 1            |         | 3.873    | 59124.480  | 369484.094 | 47.9306  |
| 2            |         | 4.287    | 57354.000  | 401389.000 | 52.0694  |
| <b>Total</b> |         |          | 116478.480 | 770873.094 | 100.0000 |

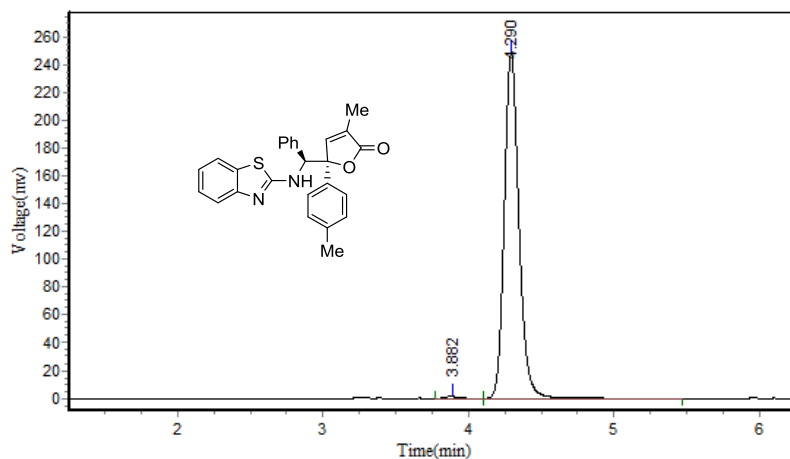

**Results**

| Peak No.     | Peak ID | Ret Time | Height     | Area        | Conc.    |
|--------------|---------|----------|------------|-------------|----------|
| 1            |         | 3.882    | 1426.520   | 9155.810    | 0.5201   |
| 2            |         | 4.290    | 248690.094 | 1751185.875 | 99.4799  |
| <b>Total</b> |         |          | 250116.614 | 1760341.685 | 100.0000 |

3ac

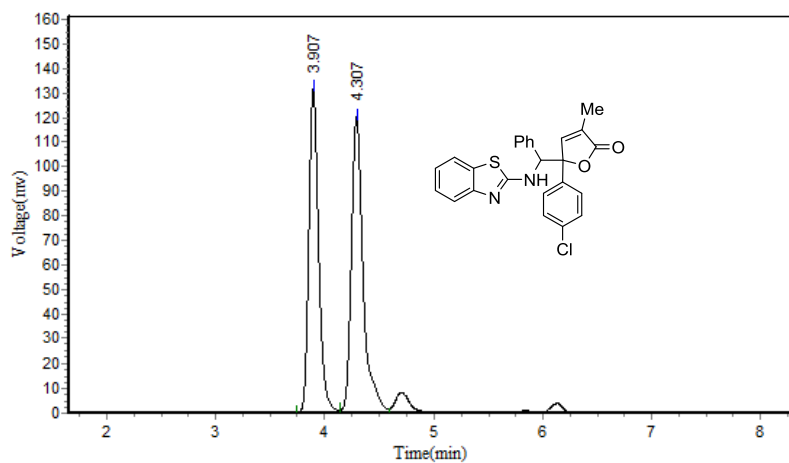

**Results**

| Peak No.     | Peak ID | Ret Time | Height     | Area        | Conc.    |
|--------------|---------|----------|------------|-------------|----------|
| 1            |         | 3.907    | 131240.828 | 824380.188  | 45.6768  |
| 2            |         | 4.307    | 119933.219 | 905572.313  | 50.1754  |
| <b>Total</b> |         |          | 259655.238 | 1804813.391 | 100.0000 |

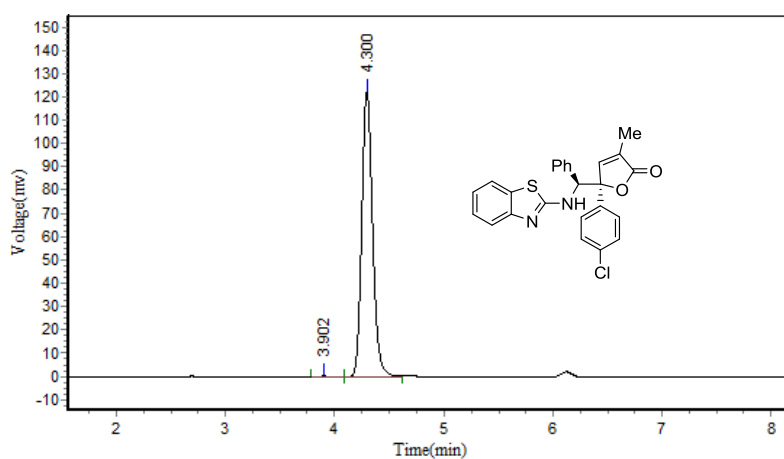

**Results**

| Peak No.     | Peak ID | Ret Time | Height     | Area       | Conc.    |
|--------------|---------|----------|------------|------------|----------|
| 1            |         | 3.902    | 530.675    | 3354.475   | 0.3944   |
| 2            |         | 4.300    | 122676.539 | 847077.938 | 99.6056  |
| <b>Total</b> |         |          | 123207.214 | 850432.413 | 100.0000 |

3ad

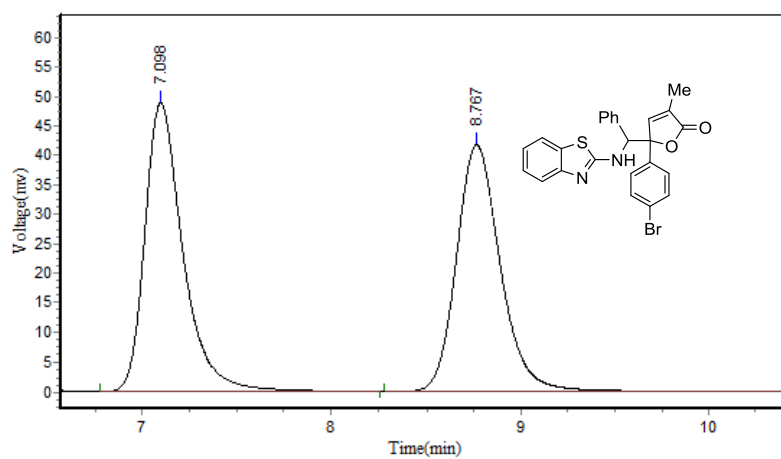

Results

| Peak No.     | Peak ID | Ret Time | Height    | Area        | Conc.    |
|--------------|---------|----------|-----------|-------------|----------|
| 1            |         | 7.098    | 48841.211 | 682449.313  | 50.3877  |
| 2            |         | 8.767    | 41631.941 | 671946.688  | 49.6123  |
| <b>Total</b> |         |          | 90473.152 | 1354396.000 | 100.0000 |

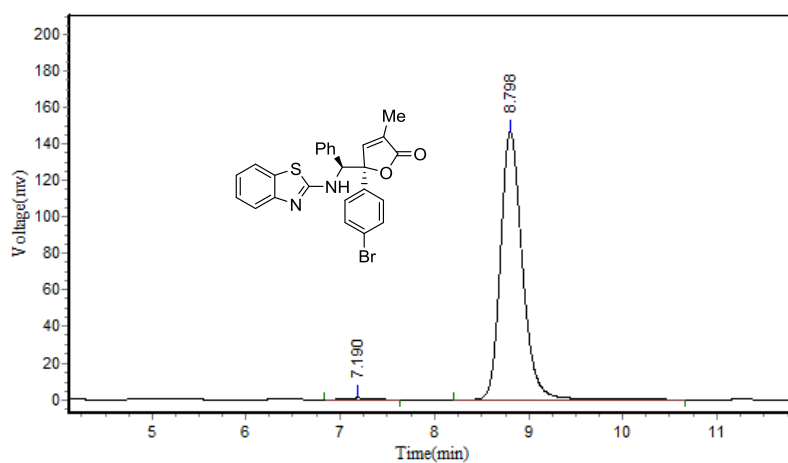

Results

| Peak No.     | Peak ID | Ret Time | Height     | Area        | Conc.    |
|--------------|---------|----------|------------|-------------|----------|
| 1            |         | 7.190    | 863.010    | 13530.850   | 0.5737   |
| 2            |         | 8.798    | 146268.453 | 2345035.750 | 99.4263  |
| <b>Total</b> |         |          | 147131.463 | 2358566.600 | 100.0000 |

3ae

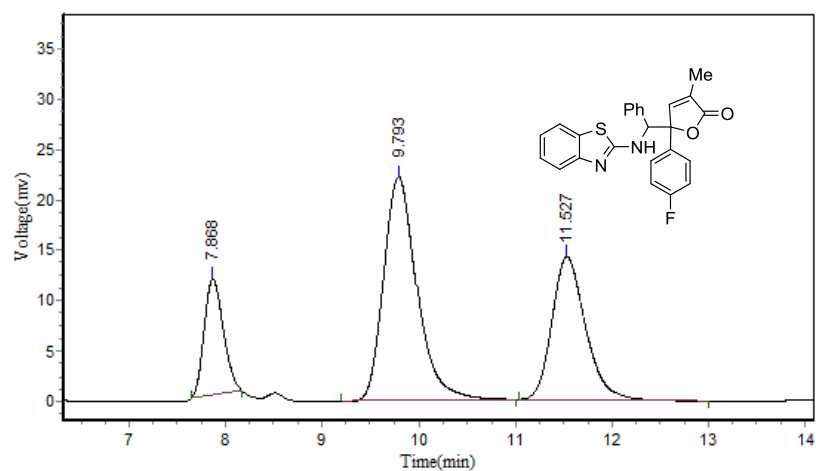

**Results**

| Peak No.     | Peak ID | Ret Time | Height    | Area        | Conc.    |
|--------------|---------|----------|-----------|-------------|----------|
| 1            |         | 7.868    | 11467.375 | 156836.141  | 15.3149  |
| 2            |         | 9.793    | 22267.996 | 526161.375  | 51.3790  |
| 3            |         | 11.527   | 14123.021 | 341080.938  | 33.3061  |
| <b>Total</b> |         |          | 47858.393 | 1024078.453 | 100.0000 |

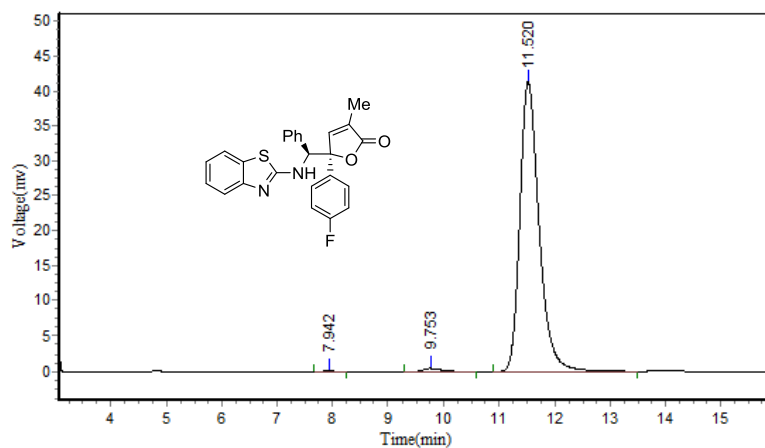

**Results**

| Peak No.     | Peak ID | Ret Time | Height    | Area        | Conc.    |
|--------------|---------|----------|-----------|-------------|----------|
| 1            |         | 7.942    | 170.293   | 1778.250    | 0.1768   |
| 2            |         | 9.753    | 477.539   | 11365.350   | 1.1301   |
| 3            |         | 11.520   | 41320.012 | 992572.750  | 98.6931  |
| <b>Total</b> |         |          | 41967.844 | 1005716.350 | 100.0000 |

3af

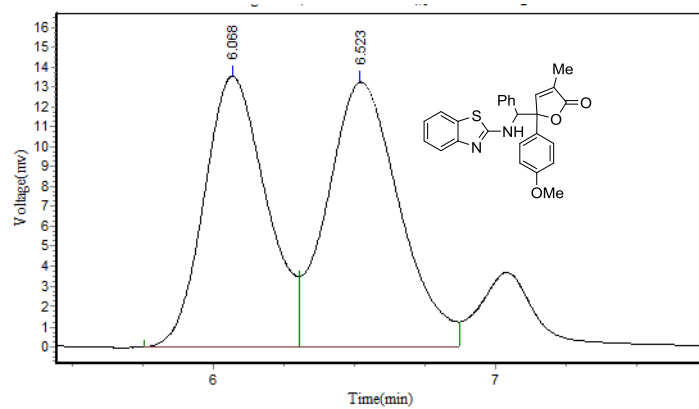

| Results      |         |          |           |            |          |
|--------------|---------|----------|-----------|------------|----------|
| Peak No.     | Peak ID | Ret Time | Height    | Area       | Conc.    |
| 1            |         | 6.068    | 13549.712 | 207473.734 | 46.8842  |
| 2            |         | 6.523    | 13257.220 | 235050.328 | 53.1158  |
| <b>Total</b> |         |          | 26806.932 | 442524.063 | 100.0000 |

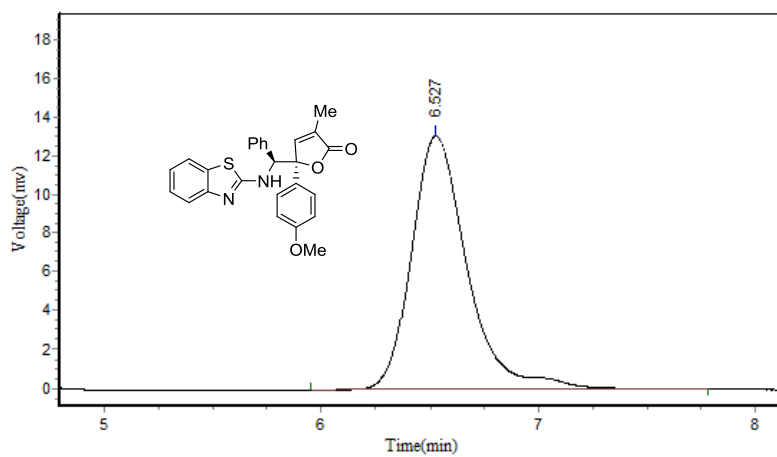

| Results      |         |          |           |            |          |
|--------------|---------|----------|-----------|------------|----------|
| Peak No.     | Peak ID | Ret Time | Height    | Area       | Conc.    |
| 1            |         | 6.527    | 13100.326 | 234027.797 | 100.0000 |
| <b>Total</b> |         |          | 13100.326 | 234027.797 | 100.0000 |

3ag

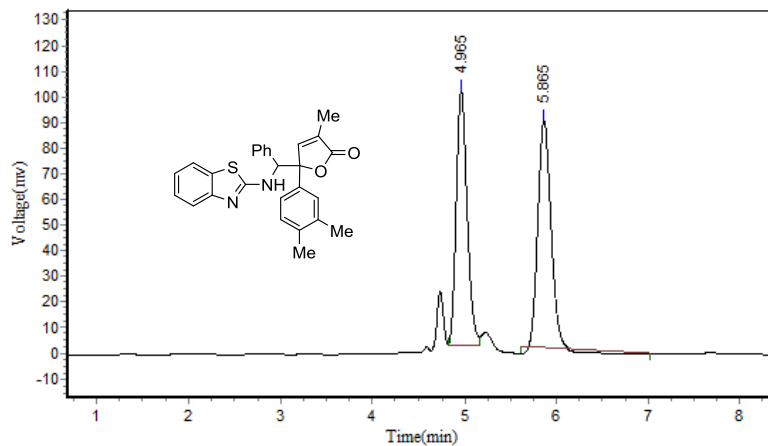

Results

| Peak No.     | Peak ID | Ret Time | Height     | Area        | Conc.    |
|--------------|---------|----------|------------|-------------|----------|
| 1            |         | 4.965    | 102447.297 | 885683.188  | 48.0509  |
| 2            |         | 5.865    | 90596.164  | 957533.688  | 51.9491  |
| <b>Total</b> |         |          | 193043.461 | 1843216.875 | 100.0000 |

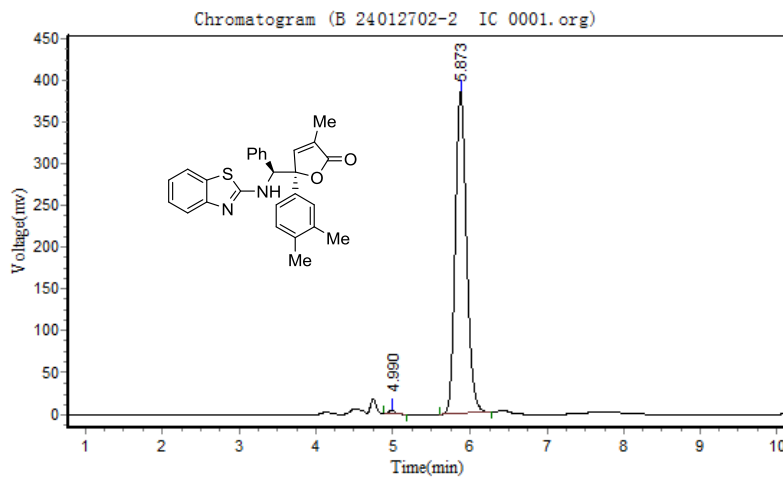

Results

| Peak No.     | Peak ID | Ret Time | Height     | Area        | Conc.    |
|--------------|---------|----------|------------|-------------|----------|
| 1            |         | 4.990    | 4181.372   | 25121.850   | 0.6338   |
| 2            |         | 5.873    | 385666.781 | 3938353.500 | 99.3662  |
| <b>Total</b> |         |          | 389848.153 | 3963475.350 | 100.0000 |

3ah

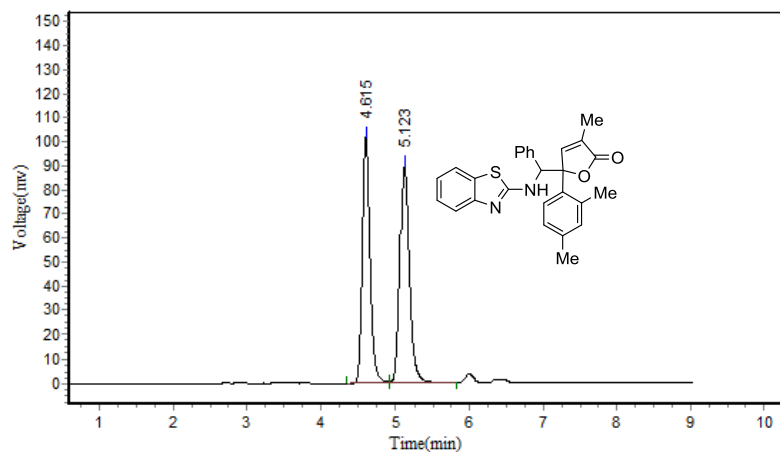

### Results

| Peak No.     | Peak ID | Ret Time | Height     | Area        | Conc.    |
|--------------|---------|----------|------------|-------------|----------|
| 1            |         | 4.615    | 102133.281 | 745479.500  | 49.5813  |
| 2            |         | 5.123    | 89738.961  | 758069.188  | 50.4187  |
| <b>Total</b> |         |          | 191872.242 | 1503548.688 | 100.0000 |

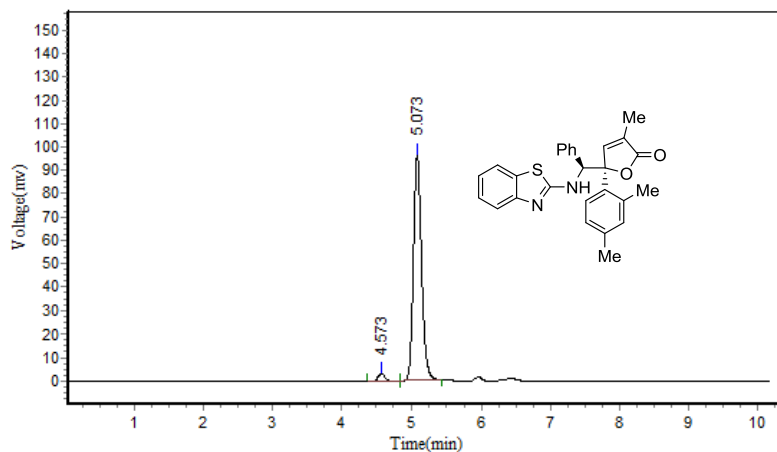

### Results

| Peak No.     | Peak ID | Ret Time | Height    | Area       | Conc.    |
|--------------|---------|----------|-----------|------------|----------|
| 1            |         | 4.573    | 3194.471  | 23705.730  | 2.8733   |
| 2            |         | 5.073    | 96785.398 | 801320.313 | 97.1267  |
| <b>Total</b> |         |          | 99979.869 | 825026.043 | 100.0000 |



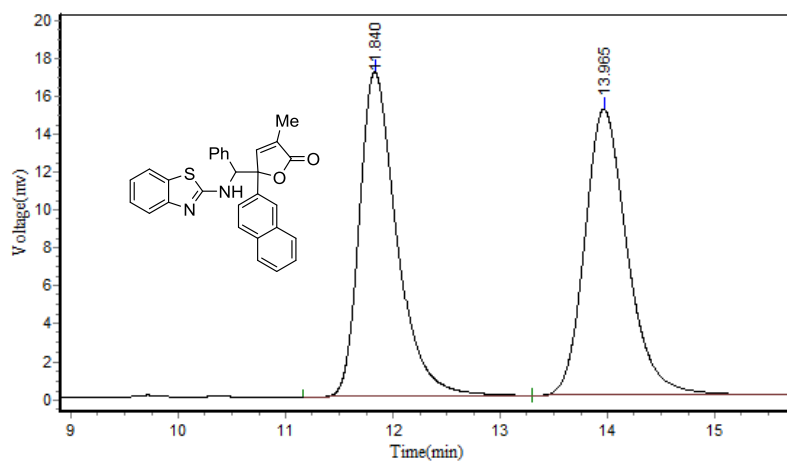

### Results

| Peak No.     | Peak ID | Ret Time | Height    | Area       | Conc.    |
|--------------|---------|----------|-----------|------------|----------|
| 1            |         | 11.840   | 17109.646 | 412744.344 | 49.8736  |
| 2            |         | 13.965   | 15054.808 | 414837.156 | 50.1264  |
| <b>Total</b> |         |          | 32164.454 | 827581.500 | 100.0000 |

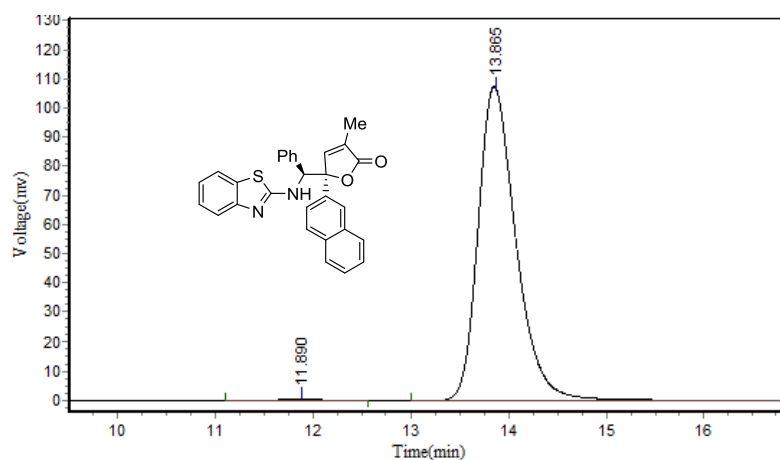

### Results

| Peak No.     | Peak ID | Ret Time | Height     | Area        | Conc.    |
|--------------|---------|----------|------------|-------------|----------|
| 1            |         | 11.890   | 497.109    | 15744.400   | 0.5420   |
| 2            |         | 13.865   | 107114.109 | 2888993.000 | 99.4580  |
| <b>Total</b> |         |          | 107611.218 | 2904737.400 | 100.0000 |

Scale up preparation of 3aa

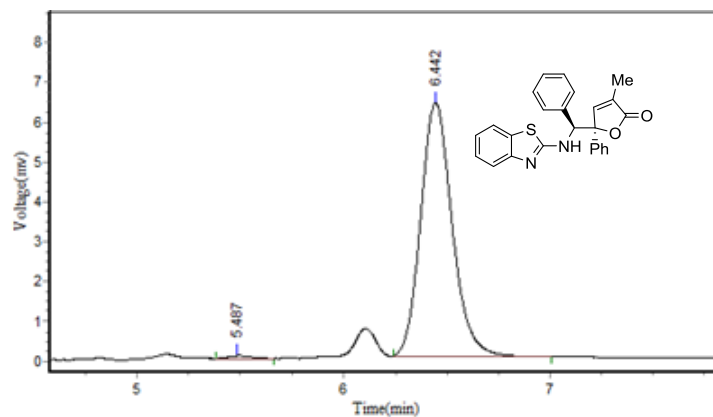

**Results**

| Peak No.     | Peak ID | Ret Time | Height   | Area      | Conc.    |
|--------------|---------|----------|----------|-----------|----------|
| 1            |         | 5.487    | 73.632   | 532.450   | 0.7893   |
| 2            |         | 6.442    | 6343.774 | 66926.805 | 99.2107  |
| <b>Total</b> |         |          | 6417.406 | 67459.255 | 100.0000 |
